# Supplementary material
Source: publisher figshare collection journal article supplement (https://gsajournals.figshare.com/articles/dataset/_/11469987)
Supplement: Supplementary file 1 [file 1]

## Sheet: Table_S4a
Table S4a. Sequence coverage analysis across the A. thaliana mitogenome in MA lines from Jiang et al. (2014) based on the average of raw counts per million mapped reads in 500-bp windows
Window Position	Control 1a	Control 1b	Control 1c	Control 2a	Control 2b	Control 2c	Control 3a	Control 3b	Control 3c	Saline 1a	Saline 1b	Saline 1c	Saline 2a	Saline 2b	Saline 2c	Saline 3a	Saline 3b	Saline 3c	Mean Salt-stressed/Control Ratio	Trt P-value	Trt FDR Correction	Line P-value	Line FDR Correction
751	189.582	197.263	188.882	202.657	179.608	193.891	191.526	200.029	181.497	204.89	205.343	215.302	203.141	197.93	208.563	232.899	190.961	195.756	1.07528	0.00921659	0.09524	1	1
1251	228.364	207.338	206.452	218.323	219.533	222.551	218.228	228.051	220.49	230.337	228.106	223.383	219.222	227.887	232.641	229.131	215.882	211.868	1.02495	0.206652	0.463633	0.915344	1
1751	233.298	229.076	224.525	239.529	227.648	228.235	224.414	243.797	228.865	233.675	239.013	232.415	231.401	248.05	229.643	229.874	225.256	230.651	1.0099	0.475497	0.704842	1	1
2251	233.92	218.837	232.491	227.494	221.283	250.69	218.641	238.435	219.648	226.251	234.013	236.221	220.957	236.799	238.709	234.163	218.672	223.849	1.00398	0.839679	0.908665	1	1
2751	242.952	208.661	234.071	206.019	230.238	230.946	219.354	228.934	216.838	215.948	227.739	228.655	223.139	214.313	219.833	229.576	209.339	225.893	0.988316	0.587635	0.770806	1	1
3251	233.031	228.184	225.936	210.954	223.105	209.375	244.941	218.148	203.188	217.803	215.01	222.777	220.093	224.558	204.59	223.813	213.641	220.182	0.982775	0.43901	0.671863	1	1
3751	214.004	231.445	214.857	210.461	216.69	219.782	231.764	200.106	209.3	222.854	197.077	224.409	207.467	217.489	204.285	218.163	215.762	217.76	0.988122	0.579739	0.767595	1	1
4251	202.662	200.944	182.256	210.505	211.891	207.806	206.627	195.115	199.61	196.337	185.932	190.184	181.994	198.204	198.601	191.748	200.408	203.937	0.961445	0.189387	0.452867	0.359783	1
4751	166.016	161.638	151.697	181.726	186.949	166.4	179.8	173.93	174.927	172.084	161.764	169.462	166.158	169.437	178.173	190.342	166.091	173.902	1.00281	0.943922	0.966978	0.176582	1
5251	148.471	155.658	153.791	167.697	162.621	154.698	151.149	171.38	160.364	163.337	151.716	157.913	168.646	156.585	177.543	191.532	166.07	167.989	1.05295	0.224758	0.482689	0.439189	1
5751	178.304	169.569	186.098	180.377	183.69	180.67	182.367	177.141	174.386	178.87	173.925	177.823	194.889	179.31	172.556	189.818	177.729	182.592	1.00925	0.581645	0.767595	1	1
6251	190.958	211.267	211.827	204.621	211.572	216.403	208.172	197.436	201.982	200.468	176.976	184.689	209.039	198.364	193.136	193.259	185.711	202.023	0.940367	0.0511631	0.222435	0.891693	1
6751	201.174	214.675	201.601	198.231	212.956	212.904	207.326	204.657	214.094	190.057	173.808	187.235	188.542	187.96	195.53	192.077	186.03	203.478	0.912776	6.67508e-05	0.00680406	1	1
7251	153.086	158.324	145.544	151.725	145.557	159.676	136.863	149.388	162.721	147.57	153.787	169.14	148.076	147.334	161.976	177.996	151.648	153.421	1.03527	0.252584	0.514873	1	1
7751	153.234	166.512	147.127	163.71	174.263	154.181	158.159	165.816	173.026	158.347	173.584	184.538	165.629	165.334	171.208	176.153	167.565	171.939	1.05376	0.0433388	0.19808	1	1
8251	140.616	137.385	130.309	140.515	152.041	131.765	142.17	132.263	155.576	137.443	156.986	170.351	149.645	149.961	165.289	169.316	147.845	158.567	1.11307	0.00381307	0.0697107	1	1
8751	136.677	130.236	142.885	146.74	150.625	163.503	149.412	137.615	155.152	161.499	148.319	169.154	140.607	144.595	147.792	163.816	157.965	158.378	1.06039	0.287009	0.541368	0.0558285	1
9251	177.637	181.047	187.316	193.822	188.554	191.853	192.993	188.073	189.647	196.714	179.432	181.632	194.058	179.379	154	188.296	191.972	189.863	0.978949	0.486238	0.711063	0.719561	1
9751	192.61	197.34	197.464	201.97	202.219	205.942	206.552	199.85	194.182	199.432	195.858	191.71	207.872	202.837	171.456	188.975	195.459	197.693	0.973952	0.19053	0.452867	1	1
10751	209.401	192.372	212.72	208.097	210.168	211.082	202.845	198.866	204.58	184.528	191.953	203.79	188.699	203.022	198.318	206.155	194.366	198.19	0.95616	0.0143602	0.120457	1	1
11251	215.861	202.17	216.217	219.494	210.174	208.645	213.203	209.222	214.413	206.674	202.429	206.28	211.354	209.478	208.395	204.599	208.073	219.677	0.98301	0.150127	0.408882	1	1
11751	234.686	230.626	231.818	226.666	228.011	227.201	236.399	232.57	234.319	225.578	221.673	214.127	228.033	225.191	204.11	208.456	222.147	237.12	0.953964	0.00935194	0.0952562	1	1
12251	219.893	212.283	222.09	192.858	205.426	208.434	227.053	217.038	221.179	223.422	210.321	214.378	222.49	204.76	192.097	216.051	202.717	223.288	0.991315	0.794065	0.883258	0.263015	1
12751	240.229	235.878	242.165	221.174	214.115	226.494	233.253	240.739	224.046	227.981	232.818	233.567	239.804	225.342	226.909	220.783	228.555	241.623	0.999658	0.989263	0.99531	0.189141	1
13251	229.513	241.32	245.565	249.771	235.936	228.755	241.581	250.806	225.557	218.803	232.924	222.612	228.583	226.637	235.088	213.816	239.285	226.408	0.951299	0.0119008	0.110198	1	1
13751	192.632	198.008	208.776	199.792	199.538	194.678	206.072	206.322	191.153	204.725	194.533	202.758	208.573	211.258	203.601	206.26	201.504	198.587	1.01938	0.169953	0.439045	1	1
14251	207.968	212.496	222.37	207.496	223.518	210.142	217.163	216.622	216.679	212.61	209.806	224.232	211.269	209.104	209.867	226.198	213.389	218.27	1.00015	0.991233	0.99531	1	1
14751	231.553	228.896	247.06	213.107	241.927	236.932	245.081	242.186	222.463	228.275	238.426	229.892	222.916	229.664	226.623	231.525	226.337	232.749	0.979709	0.259227	0.516281	1	1
15251	216.188	212.186	240.017	205.408	231.86	232.714	228.563	223.152	221.521	221.991	238.246	236.097	232.241	228.631	228.066	228.692	230.864	214.519	1.02373	0.242534	0.508609	1	1
15751	234.632	209.704	235.637	224.645	235.137	230.538	243.958	226.821	231.62	229.056	235.697	225.511	228.671	226.258	213.736	226.743	245.028	231.1	0.994745	0.778715	0.879911	1	1
16251	219.662	217.193	214.316	224.74	203.818	221.58	222.418	212.428	228.538	207.949	216.694	217.559	206.224	218.401	221.416	211.936	230.682	220.452	0.99319	0.676585	0.836018	1	1
16751	221.218	213.739	217.75	221.391	214.855	213.349	232.331	199.001	224.276	224.072	218.312	220.136	221.22	206.203	233.451	214.606	227.383	224.438	1.0163	0.390179	0.631146	1	1
17251	209.562	196.488	214.33	178.707	178.481	200.54	204.023	146.557	177.099	199.322	186.77	208.879	191.876	163.249	179.308	192.601	176.384	165.376	0.975365	0.701154	0.842212	0.313524	1
17751	209.998	224.092	243.079	147.137	166.638	235.988	215.641	116.939	144.44	191.224	207.757	206.149	175.761	145.519	140.388	204.369	159.173	152.942	0.929182	0.605661	0.780329	0.239121	1
18251	225.208	218.132	226.917	229.88	218.961	236.366	214.888	224.349	219.673	221.935	200.892	201.573	209.861	219.052	201.493	206.178	214.561	211.521	0.9368	0.000792665	0.0311505	1	1
18751	205.831	179.905	187.1	191.476	173.57	195.207	190.616	186.873	211.854	194.032	179.091	198.916	185.903	190.116	192.405	180.827	184.527	191.505	0.985422	0.545157	0.753484	1	1
19251	136.061	127.386	147.134	133.235	125.114	140.894	136.229	136.035	141.309	140.547	160.947	152.223	154.394	143.197	174.686	157.213	140.941	151.851	1.12474	0.00115118	0.0341561	1	1
19751	178.182	161.247	180.064	177.13	174.313	188.269	166.675	179.87	187.262	175.191	200.575	188.771	184.343	183.093	205	205.933	169.015	187.822	1.067	0.0362411	0.178206	1	1
20251	198.585	182.938	198.09	191.257	199.199	197.291	174.985	191.22	195.987	194.203	219.653	207.07	195.95	194.116	211.726	203.764	201.155	189.109	1.05041	0.0372874	0.179634	1	1
20751	190.602	178.716	181.285	181.042	170.936	181.316	176.187	172.787	184.389	187.554	193.24	195.025	163.782	175.847	181.196	187.24	193.42	176.022	1.0223	0.521158	0.74021	0.134093	1
21251	204.811	187.508	199.24	198.031	184.215	208.031	197.418	190.154	200.276	197.786	188.296	201.209	174.162	194.655	193.231	199.852	203.209	202.966	0.991909	0.72793	0.8453	0.86445	1
21751	167.023	161.638	183.352	185.078	176.505	175.815	173.423	174.891	179.533	179.433	181.757	198.688	169.749	188.801	181.206	200.789	186.827	188.724	1.06259	0.0634035	0.251148	0.838717	1
22251	165.962	171.122	173.633	171.95	174.484	154.974	171.598	161.027	185.841	167.285	186.675	196.676	184.207	177.373	181.104	190.086	181.875	175.433	1.07195	0.00859607	0.0914775	1	1
22751	220.345	232.407	242.132	224.869	227.303	223.954	220.995	207.496	211.031	220.312	197.511	215.121	206.43	223.126	203.019	223.179	201.343	220.908	0.950469	0.119304	0.355826	0.623771	1
23251	241.993	250.981	239.398	240.995	247.124	253.456	233.8	221.889	237.186	241.985	207.215	221.02	232.307	229.601	211.339	226.672	218.168	227.137	0.930138	0.0279882	0.154422	0.892966	1
23751	226.674	223.447	223.067	237.974	227.742	244.044	203.051	237.397	222.278	228.855	219.595	228.533	226.963	217.063	208.78	217.542	225.2	231.492	0.979639	0.439142	0.671863	0.615328	1
24251	247.52	228.822	234.697	231.676	237.396	242.168	230.55	241.141	208.25	221.758	233.162	245.144	225.908	240.833	208.789	222.041	232.179	235.129	0.982268	0.443533	0.67285	1	1
24751	246.59	246.237	244.432	237.414	230.538	229.552	244.72	245.915	216.462	218.495	226.501	238.561	240.804	226.098	207.155	224.153	241.014	236.248	0.961328	0.0948669	0.318192	1	1
25251	265.886	249.331	243.64	235.463	238.016	240.271	255.326	249.638	234.945	241.871	248.966	262.483	237.869	237.204	237.609	238.647	241.632	242.841	0.989427	0.685146	0.838027	0.205692	1
25751	260.318	240.428	244.016	234.668	245.587	241.176	245.456	238.098	231.401	248.289	264.82	261.154	229.073	231.359	234.052	262.379	239.086	225.735	1.00678	0.852387	0.915289	0.147628	1
26251	228.57	202.428	203.529	216.407	221.53	210.148	206.793	204.138	203.28	220.288	230.75	222.819	215.03	217.497	195.711	223.073	244.556	216.379	1.04707	0.206781	0.463633	0.441525	1
26751	215.21	214.838	195.945	219.44	210.705	214.058	203.142	210.738	196.553	219.746	220.044	226.494	215.274	225.068	202.514	220.496	229.328	224.275	1.05456	0.06494	0.254408	0.574676	1
27251	211.55	231.912	236.324	227.577	218.236	227.685	230.088	231.437	232.551	230.035	228.315	244.912	229.348	234.154	223.164	241.558	216.878	232.978	1.0166	0.34309	0.593746	1	1
27751	219.309	211.491	219.001	223.782	217.277	217.834	226.599	221.72	237.097	226.544	230.594	231.921	225.963	224.643	216.097	240.742	215.991	233.717	1.02613	0.257581	0.514988	0.46475	1
28251	245.573	228.495	246.566	250.385	225.3	250.173	252.899	243.462	252.48	227.853	237.178	233.931	244.295	234.417	220.961	239.534	241.116	238.606	0.964724	0.0546561	0.23059	1	1
28751	256.328	239.766	239.632	255.292	248.72	252.124	257.272	257.337	257.545	239.44	224.417	244.3	265.524	234.371	242.082	248.593	242.11	241.947	0.96412	0.137009	0.384597	0.736766	1
29251	241.688	257.255	226.741	258.522	262.825	248.811	252.079	257.488	243.158	254.929	244.524	252.972	259.27	237.004	234.281	253.438	243.399	251.823	0.992472	0.718707	0.8453	0.91223	1
29751	237.554	238.647	228.398	238.755	242.16	252.028	242.451	256.498	242.643	256.042	241.8	248.189	263.417	237.931	222.166	249.847	239.461	239.169	1.00867	0.66915	0.829746	1	1
30251	242.827	248.843	258.527	244.569	251.006	258.211	255.262	246.193	254.265	262.999	244.225	256.191	276.345	242.108	222.249	238.399	249.731	245.321	0.990204	0.660878	0.829727	1	1
30751	244.38	231.725	246.008	245.034	238.063	235.75	238.526	245.894	244.015	232.211	230.213	245.017	240.33	221.965	215.789	232.862	248.91	235.453	0.969279	0.14007	0.390116	0.911357	1
31251	222.818	216.742	209.729	218.266	210.375	219.021	226.916	244.232	218.805	229.807	236.107	236.431	210.26	205.533	207.978	224.308	234.453	225.74	1.01193	0.788164	0.883246	0.0050587	1
31751	199.435	200.958	189.2	197.346	200.329	198.815	213.456	208.449	199.747	195.625	211.81	219.241	199.852	194.832	204.793	210.204	207.394	207.823	1.02425	0.329454	0.580002	0.382576	1
32251	243.013	228.057	211.904	228.405	219.613	230.399	235.302	259.413	229.377	219.297	235.161	243.207	223.726	230.748	223.638	231.511	227.729	240.731	0.995332	0.850059	0.914166	0.948578	1
32751	225.843	231.909	206.181	216.843	220.719	218.88	242.989	224.31	249.691	232.05	244.973	252.508	224.27	243.537	218.997	244.676	239.092	245.678	1.05321	0.203256	0.461146	0.204963	1
33251	225.593	240.635	232.572	238.937	241.715	227.976	231.961	244.393	247.132	250.322	248.339	256.287	236.802	248.347	229.131	252.121	254.75	240.418	1.04017	0.118462	0.355826	0.448211	1
33751	242.968	247.029	224.65	241.977	244.809	233.231	240.999	248.016	255.489	252.429	255.933	262.24	258.097	248.658	247.079	258.406	261.516	240.102	1.04832	0.00781922	0.085328	1	1
34251	226.145	239.937	212.476	219.142	214.26	225.046	220.722	234.048	228.762	215.723	234.227	265.154	253.741	228.572	231.216	246.358	242.959	227.287	1.06172	0.0313077	0.164434	1	1
34751	267.618	239.853	236.307	256.026	261.079	223.419	249.087	255.263	255.97	245.67	250.936	291.302	269.106	256.172	261.82	270.012	263.918	256.321	1.05374	0.0526722	0.225724	1	1
35251	288.403	270.547	259.234	273.702	285.932	247.759	283.447	269.339	255.245	277.323	261.269	282.322	267.084	272.119	253.215	265.965	277.989	268.21	0.996667	0.874534	0.932052	1	1
35751	271.374	268.954	270.816	269.17	291.713	269.887	281.597	251.075	261.974	279.936	279.638	281.046	266.688	259.578	225.885	256.121	267.745	264.081	0.977082	0.53888	0.750432	0.227714	1
36251	250.474	269.956	244.824	251.592	267.409	271.357	268.329	236.607	250.169	278.742	273.868	267.587	268.075	257.51	236.233	251.168	251.659	256.127	1.01309	0.677725	0.836018	0.4441	1
36751	254.201	264.698	238.702	252.271	248.224	265.718	272.862	275.243	246.041	266.337	249.606	261.147	255.96	245.725	237.33	259.114	268.938	257.085	0.992788	0.772322	0.874077	0.704618	1
37251	257.591	286.943	260.07	287.149	287.861	263.676	274.654	286.768	268.185	278	274.294	287.291	263.278	271.637	259.76	277.789	273.977	268.343	0.992508	0.727479	0.8453	0.770411	1
37751	256.081	280.148	249.675	263.714	267.937	244.071	280.2	261.221	245.865	269.375	258.784	256.045	253.064	267.266	244.984	275.606	265.433	238.649	0.991611	0.72068	0.8453	1	1
38251	270.088	264.694	261.565	256.139	256.985	246.957	275.929	272.505	260.252	261.981	256.369	257.199	265.497	268.265	241.494	263.745	273.462	249.246	0.988222	0.570518	0.767595	0.685409	1
38751	263.5	266.892	264.464	269.316	246.304	276.615	270.753	262.387	275.444	275.03	278.464	287.523	286.232	274.624	234.567	263.985	262.418	278.705	1.01915	0.421194	0.654272	1	1
39251	253.29	275.906	275.139	272.214	282.64	272.379	274.913	280.033	285.316	283.175	280.04	281.177	259.5	280.931	248.551	261.186	273.579	286.94	0.993223	0.785727	0.882241	0.519569	1
40251	216.862	204.392	199.5	211.974	220.908	213.758	216.369	238.806	229.642	212.385	229.838	231.312	229.448	223.685	230.002	240.942	218.411	216.145	1.04096	0.229984	0.489489	0.383433	1
40751	227.639	223.587	200.478	226.674	235.969	233.15	222.025	231.554	217.683	228.245	222.445	254.973	241.889	225.063	230.771	246.492	223.87	223.564	1.03891	0.118806	0.355826	1	1
41251	255.276	249.568	250.798	239.994	258.982	253.759	253.228	253.961	235.082	248.918	248.781	260.489	256.302	252.666	246.539	256.452	260.065	261.884	1.01842	0.167648	0.436252	1	1
41751	242.657	230.623	235.498	230.91	247.44	255.247	238.031	252.184	239.147	237.95	234.732	239.906	241.753	248.94	238.372	255.744	253.182	245.576	1.01124	0.602134	0.779168	0.385237	1
42251	208.744	206.406	206.81	210.727	213.221	212.949	202.333	207.866	195.187	201.483	199.287	213.997	223.735	211.284	209.864	226.743	212.888	212.085	1.02528	0.341029	0.591615	0.188715	1
44251	235.758	250.079	250.602	260.224	238.225	244.218	244.851	234.331	238.19	232.394	246.308	253.694	246.605	225.279	231.414	262.126	247.102	245.352	0.997175	0.907337	0.947191	0.599101	1
44751	257.072	261.551	252.378	263.297	275.729	268.195	248.875	256.342	247.9	251.648	267.686	260.745	265.702	255.413	247.4	270.944	264.838	264.165	1.00738	0.77055	0.874077	0.0580637	1
45251	261.543	262.526	250.338	241.066	265.019	243.599	244.627	238.072	244.493	241.557	238.677	238.747	251.356	256.588	227.723	242.117	258.6	255.865	0.982209	0.486674	0.711063	0.51955	1
45751	282.148	279.644	253.271	282.199	283.366	291.897	259.9	283.129	301.172	254.058	259.717	256.273	281.178	263.957	235.441	255.31	274.15	275.071	0.935801	0.0170971	0.123134	1	1
46251	273.478	287.705	272.741	290.847	294.108	287.599	277.934	276.532	298.2	263.538	270.762	270.049	271.391	269.72	233.687	264.493	280.406	279.248	0.939101	0.0459361	0.20599	0.762459	1
46751	247.456	240.581	230.817	247.155	247.133	238.113	236.076	223.722	249.62	249.705	247.229	255.894	232.141	243.82	220.577	246.05	233.618	240.028	1.00388	0.881751	0.935682	0.358812	1
47251	239.741	229.614	222.462	226.863	242.461	234.136	245.503	239.678	241.475	225.179	240.79	244.787	234.242	218.387	233.14	241.669	240.354	237.617	0.997282	0.900303	0.945276	0.426646	1
47751	255.311	234.044	244.483	245.824	258.631	247.621	258.392	275.473	256.11	247.729	247.366	243.872	255.667	235.187	229.249	256.239	246.47	263.684	0.977843	0.474293	0.704523	0.231327	1
48251	236.784	227.276	243.83	247.891	248.186	228.566	237.001	252.977	229.164	234.073	244.949	245.528	256.525	237.792	219.626	263.427	226.744	247.449	1.01136	0.635115	0.80576	1	1
48751	229.022	216.121	238.221	227.507	222.743	234.509	231.202	225.525	223.072	231.038	228.101	232.222	240.257	248.101	217.785	240.513	220.4	239.457	1.02439	0.184504	0.446519	1	1
49251	265.646	256.039	240.623	260.654	251.605	248.697	268.71	255.363	260.038	243.832	246.086	245.622	270.031	276.558	251.066	255.547	270.57	260.888	1.00556	0.84569	0.910841	0.200788	1
49751	332.385	333.148	308.746	324.765	310.712	328.67	305.639	311.972	312.248	308.057	292.676	301.758	328.091	328.603	325.03	311.347	332.123	319.888	0.992779	0.813868	0.891379	0.0349362	1
50251	313.108	288.6	307.629	297.226	297.211	314.918	308.72	255.762	273.901	286.639	255.648	272.109	304.196	305.955	264.986	259.746	295.124	274.719	0.948081	0.198597	0.456256	0.755247	1
50751	256.11	240.307	264.521	247.033	260.869	272.415	261.363	213.461	244.926	257.779	243.561	254.319	279.743	247.639	228.788	256.963	276.172	244.184	1.01245	0.697855	0.841117	1	1
51251	260.44	241.644	257.012	275.536	268.152	276.879	264.162	264.87	252.708	253.073	266.719	260.569	258.433	272.912	242.721	254.041	275.232	261.41	0.9931	0.784712	0.882241	0.428631	1
51751	279.021	292.151	283.775	287.371	285.245	281.4	293.753	278.307	258.427	268.163	257.951	262.943	265.633	283.835	266.827	254.899	279.395	269.472	0.948677	0.00656919	0.0767841	1	1
52251	255.122	273.544	277.561	256.553	256.846	261.416	264.145	263.131	253.11	259.239	251.866	259.297	256.22	254.492	266.004	265.765	265.085	251.203	0.98634	0.357995	0.604297	0.991466	1
52751	228.002	246.367	226.467	220.752	234.137	205.461	240.385	223.124	218.526	251.971	214.719	234.688	227.365	246.684	241.647	253.796	221.23	225.809	1.03655	0.198939	0.456256	1	1
53251	250.413	237.154	237.135	242.034	245.915	232.801	249.768	237.612	236.716	242.871	245.872	237.971	237.582	243.56	250.544	249.257	254.741	237.301	1.0139	0.273784	0.528563	1	1
53751	268.077	271.767	273.269	288.085	282.13	273.738	284.815	285.364	270.491	275.192	271.261	265.422	260.899	264.707	265.266	258.214	268.621	262.95	0.95788	0.0445928	0.201232	0.263652	1
54251	241.833	238.159	235.228	249.281	255.407	242.956	243.865	281.963	262.896	236.657	254.907	245.791	250.652	252.88	247.21	260.257	271.754	262.308	1.01369	0.726204	0.8453	0.0580462	1
54751	224.772	207.422	221.004	229.349	227.058	213.716	228.845	241.317	233.847	241.817	218.114	230.207	236.974	239.381	239.622	247.361	249.537	245.775	1.05991	0.129957	0.366242	0.0650191	1
55251	237.451	242.709	235.603	252.317	245.865	242.986	243.111	249.714	259.95	258.605	259.4	245.173	252.42	268.105	246.415	245.653	248.444	263.587	1.03534	0.0360444	0.178206	1	1
55751	238.984	224.69	233.648	235.366	232.63	234.824	239.305	220.245	240.28	243.88	259.043	242.313	236.192	267.623	226.553	241.703	250.592	236.488	1.04972	0.0263399	0.151454	1	1
56251	248.809	229.554	236.496	237.157	223.645	232.167	254.153	225.53	242.418	244.99	240.362	244.742	242.27	242.328	229.277	252.501	256.968	250.138	1.03458	0.199652	0.456256	0.447505	1
56751	211.897	216.141	213.173	219.727	207.658	214.786	215.432	219.81	232.215	230.4	216.083	228.542	240.955	222.487	233.435	236.732	217.951	229.66	1.05403	0.0050428	0.071048	1	1
57251	197.803	197.811	198.252	195.658	196.376	190.238	188.337	200.165	210.146	204.354	201.754	196.553	210.858	213.632	214.381	212.887	206.901	193.911	1.04533	0.0848862	0.295239	0.497049	1
57751	212.612	200.146	198.837	206.707	220.489	208.786	209.106	207.352	227.655	212.915	205.808	214.623	215.815	198.854	220.904	216.425	221.631	223.729	1.02062	0.385888	0.631051	0.73382	1
58251	165.75	169.736	166.638	179.351	183.218	158.152	171.38	169.197	195.326	196.499	198.227	199.704	174.988	165.203	212.308	214.948	210.221	191.275	1.13128	0.0321122	0.165913	0.868874	1
58751	160.752	170.18	170.339	172.715	175.685	153.303	168.342	166.97	175.659	205.626	194.705	198.9	181.296	172.774	211.278	217.502	203.836	190.827	1.17359	5.0322e-05	0.00597732	1	1
59251	184.103	185.861	192.461	189.32	198.668	191.525	199.356	203.619	197.054	206.629	212.244	212.309	201.947	190.499	222.341	212.392	208.894	200.473	1.07219	0.02415	0.142676	0.850628	1
59751	196.885	202.555	205.241	211.974	220.064	204.319	208.649	211.398	223.67	223.105	224.539	229.889	223.823	225.896	234.23	238.025	230.445	209.131	1.08188	0.0133292	0.11733	0.926316	1
60251	173.4	194.838	200.13	190.326	185.834	183.337	195.05	192.913	211.734	208.215	234.055	225.657	200.72	206.351	235.133	230.421	221.988	210.578	1.14214	0.000180589	0.0117054	1	1
60751	211.935	216.161	218.829	220.051	210.811	215.715	237.446	219.6	214.683	231.238	251.734	249.506	230.288	227.801	240.502	233.789	227.005	237.426	1.08348	0.0177949	0.125278	0.561875	1
61251	237.669	253.199	234.561	244.158	241.838	248.902	250.001	247.15	242.275	271.1	269.268	256.318	254.66	260.092	255.751	252.753	247.372	265.873	1.06066	0.0129575	0.115484	0.891811	1
61751	240.056	256.373	234.193	251.529	256.383	251.4	243.827	275.535	240.175	249.609	259.577	269.17	250.138	249.477	250.773	251.777	257.308	263.2	1.02292	0.245095	0.512471	1	1
62251	221.58	217.938	208.779	232.003	219.852	216.848	211.606	232.792	211.105	229.496	243.212	236.842	235.224	229.955	240.674	250.218	223.533	235.229	1.077	0.000543747	0.0270372	1	1
62751	237.817	233.68	221.937	251.594	236.868	237.376	234.624	240.923	224.467	265.059	246.742	255.271	258.547	251.91	254.362	247.303	246.335	246.33	1.07199	0.0180781	0.125278	0.489425	1
63251	239.911	244.63	234.585	247.407	244.788	227.33	230.294	231.961	231.572	252.229	251.687	252.513	246.647	246.621	253.351	232.059	238.93	232.708	1.03483	0.247116	0.514638	0.0188247	1
63751	246.124	269.104	245.311	255.119	259.837	256.934	252.242	265.248	248.487	261.685	270.159	277.46	260.246	277.793	269.494	273.916	255.371	263.212	1.04826	0.0054595	0.071048	1	1
64251	260.825	295.649	278.546	260.495	294.858	259.702	276.339	285.898	268.046	278.937	272.269	283.921	259.575	292.202	301.426	290.658	270.247	284.628	1.02157	0.367172	0.608822	1	1
64751	253.537	278.478	245.974	242.253	259.695	240.322	257.866	256.229	254.556	272.665	274.564	276.038	262.398	277.191	279.024	288.236	258.632	259.163	1.06947	0.00299367	0.0561706	1	1
65251	250.073	260.188	240.295	254.952	245.142	248.673	242.515	255.345	252.984	269.51	268.006	274.084	254.249	259.193	266.801	274.824	252.907	256.471	1.05594	0.00119831	0.0341561	1	1
65751	250.237	257.499	261.528	257.07	257.566	254.676	239.855	245.531	247.154	266.636	261.637	262.767	265.974	257.339	283.723	267.784	278.194	270.95	1.06336	0.028992	0.156601	0.270745	1
66251	294.844	308.203	307.278	298.124	307.178	292.757	300.265	315.48	305.891	312.218	308.118	289.277	307.796	296.801	312.467	291.906	312.593	312.686	1.00507	0.706213	0.843433	1	1
66751	289.76	282.517	275.099	280.497	272.612	265.318	267.898	288.374	279.318	273.393	281.574	277.279	268.622	292.579	271.643	282.913	279.299	285.059	1.00438	0.749555	0.863381	1	1
67251	295.091	289.913	294.227	290.341	297.037	273.93	282.464	296.761	266.426	279.954	285.323	284.747	296.413	290.973	272.298	277.681	278.806	291.002	0.988789	0.478843	0.705403	1	1
67751	264.802	277.486	266.804	272.841	279.133	247.435	258.157	286.837	260.397	267.822	293.366	282.927	280.749	257.256	292.722	274.169	261.448	292.868	1.03705	0.124772	0.35872	1	1
68251	260.85	270.968	269.125	279.767	251.802	260.95	243.143	264.701	256.93	267.064	294.091	276.308	275.278	262.833	303.248	266.21	290.969	270.022	1.06267	0.0142345	0.120457	1	1
68751	272.414	270.865	260.103	266.243	267.695	275.698	279.106	273.016	259.358	270.124	269.707	254.904	290.47	267.449	290.936	268.545	290.187	266.276	1.01819	0.4062	0.641504	0.780616	1
69251	243.696	243.04	233.634	230.583	235.187	219.115	248.316	232.621	252.993	261.101	264.056	256.823	277.869	261.909	272.018	278.252	267.769	250.128	1.11721	0.00789852	0.085328	0.476084	1
69751	314.458	278.708	304.829	295.046	279.142	289.345	304.941	291.143	290.212	308.072	299.842	306.27	312.935	304.155	265.93	304.32	316.728	284.97	1.02092	0.36426	0.606816	1	1
70251	301.474	296.885	318.866	292.357	306.175	312.666	304.458	288.082	276.019	294.922	305.561	309.849	318.672	294.228	280.929	298.27	285.352	295.687	0.99499	0.812158	0.891379	0.971952	1
70751	306.057	290.695	313.349	295.676	318.717	311.99	311.493	303.358	289.555	310.976	315.85	316.171	314.413	298.239	301.296	300.803	301.477	307.326	1.00936	0.510346	0.729212	1	1
71251	270.136	290.13	274.51	263.27	294.501	271.168	264.433	284.566	275.288	285.426	305.723	299.005	275.363	291.033	274.844	299.368	278.528	277.711	1.03979	0.0572669	0.23533	1	1
71751	256.697	269.475	255.774	240.073	255.952	242.327	234.618	262.481	266.79	289.408	292.914	278.1	254.57	266.245	274.666	290.714	267.074	254.488	1.08055	0.0574297	0.23533	0.48709	1
72251	271.836	299.594	291.328	280.535	283.856	277.071	281.661	298.942	292.447	302.364	290.929	267.907	288.149	295.537	286.835	277.144	305.702	277.642	1.0058	0.755096	0.867921	1	1
72751	297.4	314.373	291.105	300.862	316.682	299.89	311.124	302.803	299.763	313.544	279.762	279.207	305.82	309.981	293.876	297.943	326.825	285.444	0.984784	0.46136	0.689622	1	1
73251	286.28	284.12	287.493	274.732	284.649	272.788	284.279	280.204	260.22	274.88	286.047	292.637	289.666	306.4	281.685	297.435	296.085	285.349	1.03794	0.0711842	0.26997	0.970836	1
73751	314.731	331.508	312.152	313.885	318.885	316.757	319.937	321.97	292.487	296.625	295.318	304.73	311.696	316.459	296.811	320.115	303.619	314.212	0.970894	0.120555	0.355826	0.993663	1
74251	282.581	294.176	289.549	303.724	301.229	296.821	302.008	311.514	284.397	285.765	270.637	296.279	293.934	315.438	311.192	287.294	296.66	290.289	0.993057	0.801439	0.888505	0.16833	1
74751	264.481	279.898	271.875	272.492	278.431	279.113	289.523	277.629	280.178	288.716	280.762	279.348	283.092	291.055	293.463	278.605	302.145	274.704	1.03139	0.0327416	0.166748	1	1
75251	293.012	305.738	299.606	296.872	288.168	307.333	293.381	281.14	270.742	296.35	294.905	275.586	314.135	298.447	281.161	293.236	299.721	275.063	0.997197	0.902852	0.945276	0.745746	1
75751	289.619	312.299	294.515	307.36	285.655	308.464	295.144	305.846	283.657	297.838	286.835	289.101	298.36	299.117	287.814	285.732	284.631	301.808	0.980868	0.194725	0.454923	1	1
76251	285.69	301.432	298.757	301.408	292.719	287.95	299.7	290.47	274.194	300.032	276.079	295.2	283.672	271.274	287.277	291.156	307.577	293.729	0.99	0.612596	0.78442	0.74668	1
76751	289.356	295.99	310.917	303.575	290.522	292.733	301.021	300.195	285.43	296.047	272.412	288.741	304.19	271.003	285.064	308.522	317.592	276.503	0.981397	0.383016	0.629241	1	1
77251	277.671	290.461	299.815	286.976	306.222	308.569	281.166	300.338	295.544	295.784	285.572	314.939	318.325	308.717	298.683	304.289	308.737	294.203	1.03117	0.0876108	0.298883	1	1
77751	222.222	248.826	239.547	241.009	263.35	239.006	224.254	249.351	233.451	264.376	228.315	237.855	262.716	260.608	258.393	269.598	243.246	232.237	1.04458	0.129484	0.366242	1	1
78251	238.85	222.402	242.483	219.892	226.037	224.886	223.71	231.442	228.236	228.79	216.223	217.195	230.337	235.452	244.024	228.147	226	232.178	1.0002	0.993914	0.99531	0.103996	1
78751	286.873	259.356	270.319	262.867	248.251	274.706	262.518	240.105	263.764	277.575	245.171	259.306	268.643	258.814	255.732	273.342	272.744	272.451	1.00634	0.80404	0.888505	0.779017	1
79251	240.854	228.789	237.626	232.931	233.839	238.591	249.364	208.444	235.179	228.035	239.923	244.872	244.827	233.261	226.674	239.141	244.436	235.896	1.01494	0.438436	0.671863	1	1
79751	281.254	266.889	290.875	280.094	287.318	282.055	297	287.947	293.574	273.399	289.218	296.392	275.762	291.369	310.337	259.227	290.752	275.751	0.998131	0.937619	0.964678	0.761114	1
80251	268.298	270.226	285.832	273.069	270.981	258.933	278.804	278.238	286.7	274.237	272.877	277.234	275.181	277.077	312.257	276.528	286.472	281.965	1.02539	0.274289	0.528563	0.756087	1
80751	239.052	243.842	255.249	241.325	240.641	241.224	251.357	252.98	254.299	249.163	250.774	238.575	253.784	258.654	269.685	266.315	260.962	254.44	1.03711	0.196672	0.455284	0.0496414	1
81251	228.659	242.907	252.523	240.676	232.621	236.841	246.675	249.891	229.841	233.052	241.2	234.166	250.51	253.003	281.097	260.934	256.684	235.06	1.03937	0.279103	0.533513	0.377557	1
81751	270.325	260.215	267.999	266.257	237.526	273.654	257.744	268.687	264.755	260.628	250.119	258.648	270.061	286.776	281.968	267.937	270.669	242.579	1.00939	0.756611	0.867921	0.392076	1
82251	231.136	233.97	228.036	239.38	220.578	235.468	224.562	233.298	245.418	245.754	241.345	242.172	244.679	254.34	237.107	255.081	230.629	225.067	1.04031	0.0381099	0.181149	1	1
82751	245.772	252.023	240.362	249.498	248.882	243.683	222.688	250.591	262.441	266.855	229.05	247.296	263.072	256.346	266.855	280.322	245.318	241.333	1.03633	0.179998	0.446519	1	1
83251	264.1	274.142	264.531	261.588	258.639	262.423	278.955	268.137	269.791	273.054	253.104	256.531	275.738	276.067	277.67	281.604	266.936	270.652	1.01209	0.606034	0.780329	0.0820313	1
83751	263.516	285.226	273.898	281.246	258.25	258.753	277.768	252.985	262.202	261.616	254.363	251.269	271.506	254.004	284.883	278.471	274.927	269.382	0.994439	0.826754	0.898591	0.611578	1
84251	281.892	314.363	284.343	290.596	295.61	276.846	275.545	267.352	266.523	287.387	243.958	267.785	289.757	281.325	284.584	271.628	269.237	256.818	0.9606	0.307348	0.559028	0.238849	1
84751	284.859	305.577	289.363	296.193	314.066	276.32	284.201	289.409	275.424	290.782	250.24	282.407	308.129	296.27	293.317	268.19	275.293	268.659	0.9686	0.401906	0.638216	0.250589	1
85251	315.27	304.428	317.845	299.141	307.862	281.024	302.377	310.136	284.408	293.117	282.594	281.862	298.003	295.976	298.667	296.035	305.292	302.132	0.974724	0.327751	0.580002	0.197965	1
85751	298.27	276.831	299.92	293.62	292.103	276.545	276.266	299.691	265.384	281.598	271.618	270.002	294.351	306.241	300.476	282.186	282.34	297.027	1.0028	0.92666	0.960265	0.223114	1
86251	293.381	279.6	300.678	288.11	279.036	274.655	281.518	288.829	265.894	274.512	272.594	272.504	294.221	301.325	267.564	268.706	292.519	272.912	0.986345	0.538817	0.750432	0.859506	1
86751	310.096	301.809	312.088	309.64	299.772	286.087	298.685	310.259	298.727	296.916	294.236	293.251	301.694	309.099	282.706	292.572	314.797	301.892	0.985333	0.310572	0.562024	1	1
87251	303.809	306.469	309.95	319.022	314.944	294.997	306.422	308.906	309.603	305.516	273.583	285.41	303.604	311.088	286.883	282.057	307.53	304.966	0.959092	0.0242129	0.142676	1	1
87751	283.621	297.79	290.588	296.918	292.091	290.545	285.173	294.155	289.885	304.211	277.75	276.268	289.246	272.943	269.933	264.833	287.438	292.58	0.967352	0.049551	0.217564	1	1
88251	258.974	272.425	282.51	264.16	285.13	271.85	285.455	274.832	273.93	296.155	264.278	266.275	267.235	268.653	271.236	273.182	275.999	292.672	1.0026	0.886023	0.938684	1	1
88751	317.114	312.93	342.081	306.827	304.689	308.888	323.632	336.34	322.516	313.035	299.313	309.813	297.35	318.573	317.966	313.019	307.416	311.786	0.969828	0.213182	0.469881	0.303023	1
89251	301.583	305.838	307.24	288.055	304.583	323.798	317.016	316.657	304.332	301.645	301.783	298.875	299.1	302.156	306.567	301.261	329.641	300.978	0.990215	0.533975	0.749317	1	1
89751	283.226	293.12	271.283	255.636	277.189	288.984	281.914	280.012	284.294	300.047	285.624	273.691	270.351	282.497	290.821	287.931	295.511	282.673	1.02126	0.238051	0.50365	1	1
90251	292.82	272.962	283.295	286.059	262.695	301.21	278.123	288.051	291.485	298.251	278.416	273.971	269.475	289.989	290.167	281.104	277.971	286.282	0.995669	0.804391	0.888505	1	1
90751	321.171	275.979	308.455	306.337	284.053	305.358	296.299	293.26	298.274	295.913	278.834	285.097	290.398	309.673	295.806	287.462	290.568	297.805	0.97857	0.251937	0.514873	1	1
91251	312.973	297.339	309.26	298.895	290.711	307.757	285.33	297.909	297.628	306.552	282.57	276.503	287.384	300.093	303.264	290.637	313.112	284.514	0.98029	0.262225	0.516598	1	1
91751	282.601	299.337	273.641	288.986	265.22	283.519	296.989	290.166	268.595	300.714	277.8	273.258	280.217	281.658	300.733	288.773	293.023	269.688	1.00659	0.739389	0.854679	1	1
92251	235.126	235.383	234.872	267.298	231.294	255.53	241.927	261.223	241.914	267.418	253.104	242.433	251.1	262.545	288.517	279.895	258.509	253.739	1.06926	0.0196597	0.131003	1	1
92751	267.551	261.631	264.048	278.149	260.828	280.739	252.87	284.72	265.356	269.049	271.848	270.223	275.735	284.805	270.181	276.531	283.6	275.53	1.0255	0.106161	0.331986	1	1
93251	269.421	275.064	282.077	277.819	266.376	264.726	277.736	272.95	267.237	268.127	272.232	254.15	289.204	283.787	274.892	270.012	280.752	282.138	1.00892	0.684572	0.838027	0.185996	1
93751	257.412	230.797	237.078	237.062	251.254	236.469	244.269	239.545	248.635	239.901	245.245	248.46	236.494	252.11	255.758	264.614	255.808	239.691	1.02546	0.160298	0.421659	1	1
94251	219.367	220.494	208.099	218.439	230.323	212.15	220.308	231.687	220.473	232.981	236.663	226.581	223.275	228.597	245.197	252.477	232.449	226.128	1.06208	0.00394109	0.0702499	1	1
94751	228.072	257.682	223.92	263.576	251.507	250.922	253.056	255.554	260.881	258.446	269.746	258.281	254.542	257.941	276.812	251.792	262.254	254.664	1.04423	0.180431	0.446519	0.367684	1
95251	225.436	252.037	227.745	247.266	233.721	242.811	252.928	233.684	255.048	248.472	261.346	249.111	234.901	258.682	255.192	249.378	239.569	236.742	1.02889	0.176045	0.446519	1	1
95751	193.505	193.976	191.886	205.197	190.754	202.488	189.411	179.762	214.652	227.449	216.178	202.533	206.923	212.088	239.796	233.67	207.511	192.351	1.1004	0.00583607	0.0718279	1	1
96251	230.302	247.72	248.349	245.481	248.322	229.909	240.539	219.173	231.128	251.355	228.754	227.066	245.834	246.19	278.579	244.12	239.004	232.463	1.0245	0.48847	0.712152	0.463299	1
96751	205.96	232.841	226.724	209.447	225.68	219.457	234.446	222.743	215.85	217.366	202.162	211.157	245.964	244.478	250.681	227.789	217.289	213.616	1.01874	0.729562	0.845817	0.0082914	1
97251	188.196	207.759	191.169	206.918	198.007	189.069	199.682	194.291	193.843	207.171	195.21	196.389	218.246	210.357	238.538	220.311	198.468	182.024	1.05528	0.222125	0.478475	0.429614	1
97751	208.34	227.964	211.857	225.773	213.215	209.958	225.496	210.257	214.185	233.007	229.37	225.196	228.169	224.444	236.796	232.104	211.572	216.876	1.04648	0.015677	0.122245	1	1
98251	186.798	200.286	211.918	202.089	195.606	191.567	217.224	190.065	197.794	223.27	203.96	207.743	207.672	217.457	237.549	232.97	204.285	212.401	1.08585	0.00546618	0.071048	1	1
98751	229.513	256.747	238.028	263.019	247.962	248.55	246.591	258.733	248.811	269.86	242.99	238.001	248.001	258.026	282.044	260.065	247.135	258.459	1.02977	0.217141	0.472017	1	1
100251	312.068	292.328	303.729	302.983	300.155	289.823	297.37	308.124	289.04	295.61	294.057	275.478	300.297	292.128	301.633	279.058	298.544	295.261	0.976423	0.101972	0.326035	1	1
100751	284.519	290.077	299.687	276.915	293.707	273.822	295.991	297.257	293.207	289.267	278.025	266.698	276.805	275.873	298.804	295.366	294.406	271.592	0.977604	0.261454	0.516598	0.9928	1
101251	311.905	301.562	309.727	305.45	321.319	308.737	305.688	305.7	314.036	306.833	286.008	277.961	301.754	310.491	289.06	303.135	315.653	293.755	0.964271	0.027863	0.154422	1	1
101751	334.095	314.464	325.131	330.473	315.372	314.425	318.974	321.914	325.058	315.634	308.295	294.438	303.867	319.823	301.204	286.477	310.15	324.218	0.953171	0.00526132	0.071048	1	1
102251	325.293	288.847	309.358	321.776	311.263	295.901	301.819	288.967	298.561	291.318	300.411	295.261	302.147	330.469	283.663	298.581	305.804	309.434	0.990992	0.665394	0.829746	1	1
103251	302.237	316.555	317.814	305.621	302.252	298.538	303.116	288.028	310.406	311.12	287.882	294.344	305.321	301.653	291.359	289.753	299.619	317.612	0.983275	0.280174	0.534128	1	1
103751	275.765	294.486	290.006	271.413	297.955	274.402	293.36	292.25	286.273	294.045	280.508	285.894	291.834	271.026	304.262	295.621	285.197	291.803	1.00943	0.56444	0.766563	1	1
104251	289.468	296.234	305.19	274.44	287.554	283.604	292.848	307.97	288.539	306.198	274.527	267.368	279.957	282.309	302.437	286.019	306.818	288.092	0.987767	0.576493	0.767595	0.991045	1
104751	293.728	297.075	315.67	292.754	302.586	295.715	301.778	310.543	300.03	303.63	300.093	277.307	285.658	301.42	316.024	296.43	308.714	286.463	0.987402	0.442905	0.67285	1	1
105251	292.457	301.251	311.178	292.633	292.946	297.906	301.58	299.261	305.413	295.964	313.288	289.049	302.026	291.977	301.604	280.28	311.6	296.675	0.995487	0.745455	0.860048	1	1
105751	266.217	272.866	263.188	267.417	258.268	265.219	266.795	276.555	261.342	275.225	286.124	267.194	288.264	283.624	278.494	276.902	268.771	290.253	1.04879	0.00124553	0.0341561	1	1
106251	271.326	267.995	271.51	293.604	272.11	280.456	300.864	288.596	275.336	277.787	298.078	283.098	289.829	298.598	294.077	310.163	292.258	282.314	1.0414	0.122911	0.357305	0.57464	1
106751	283.085	279.828	274.209	289.922	293.66	265.877	297.501	284.305	295.282	279.945	280.561	285.005	291.159	297.052	303.445	303.286	286.149	284.338	1.01844	0.428175	0.662232	0.330107	1
107251	281	276.744	283.332	285.867	281.626	258.954	271.861	287.008	277.161	295.79	281.69	270.799	275.275	294.507	270.079	289.202	288.98	274.895	1.01504	0.357626	0.604297	1	1
107751	295.062	290.882	298.517	275.603	296.45	288.47	285.993	296.042	291.522	312.485	290.627	250.792	294.608	283.145	287.36	285.177	323.218	288.229	0.998893	0.964423	0.984063	1	1
108251	288.499	317.841	327.597	283.008	323.357	298.417	303.151	315.866	302.424	306.974	315.128	287.533	326.063	297.771	300.886	292.143	320.458	314.432	1.00044	0.984175	0.99531	1	1
108751	262.307	278.394	276.343	278.465	288.36	277.429	276.973	276.967	268.9	269.082	278.58	264.61	274.48	261.338	246.065	251.777	269.796	271.335	0.960922	0.0222177	0.140187	1	1
109251	243.69	244.333	259.786	243.966	258.769	258.984	262.972	247.587	241.848	247.87	258.622	238.681	245.665	245.463	250.827	247.443	244.776	252.987	0.986913	0.350352	0.602213	1	1
109751	224.454	223.678	225.739	227.074	228.244	223.945	227.786	213.763	220.462	235.588	237.392	221.507	220.262	224.227	229.401	233.162	217.772	228.118	1.01602	0.214838	0.469881	1	1
110251	204.616	205	197.264	205.863	211.847	205.605	204.483	211.144	218.159	210.823	229.923	226.946	203.356	214.114	202.272	221.372	202.869	221.94	1.03736	0.218693	0.47251	0.304364	1
110751	238.584	245.151	232.637	250.074	245.9	247.973	240.522	235.405	240.801	249.942	252.517	268.812	233.435	235.427	239.278	240.334	249.45	248.917	1.01886	0.538741	0.750432	0.0118722	1
111251	257.075	256.75	266.152	257.8	254.171	266.4	256.789	250.522	247.892	245.38	242.961	257.197	241.907	248.29	242.947	244.844	250.537	253.703	0.962921	0.0377124	0.180463	0.628545	1
111751	237.41	239.95	245.108	253.358	233.447	255.81	233.588	251.903	241.262	235.666	243.569	237.329	241.082	241.848	233.321	227.357	216.304	250.755	0.970525	0.120771	0.355826	1	1
112251	221.709	221.877	219.509	236.058	213.437	229.299	233.922	226.359	221.922	229.002	231.525	214.583	222.027	221.959	238.337	224.479	206.89	234.237	0.99948	0.977418	0.99415	1	1
112751	269.389	249.184	254.772	269.327	249.395	271.083	254.406	254.355	249.062	243.85	255.587	241.225	252.955	249.006	264.85	244.489	267.159	257.297	0.980803	0.273824	0.528563	1	1
113251	274.614	254.499	273.326	274.5	264.63	277.709	275.3	262.967	263.434	235.109	280.209	242.062	242.291	241.643	259.156	245.334	267.59	253.53	0.936367	0.00708306	0.0814552	1	1
113751	228.884	233.797	243.887	249.749	249.174	238.401	256.577	242.759	239.551	229.897	244.801	218.472	226.235	229.524	231.76	225.172	226.636	223.533	0.941932	0.022932	0.142179	0.875151	1
114251	250.172	267.337	252.648	272.606	253.749	217.792	251.558	251.701	243.687	240.186	252.297	215.815	248.654	244.279	230.568	241.872	234.562	246.312	0.952811	0.0796519	0.288283	1	1
114751	273.039	282.052	266.216	295.373	275.137	243.791	279.124	256.631	255.492	270.848	279.879	267.176	253.874	251.653	247.998	266.413	252.825	251.708	0.965189	0.255957	0.514988	0.734933	1
115251	269.283	265.399	264.815	262.975	265.252	254.096	264.229	241.317	264.766	280.191	292.142	265.967	263.97	255.69	259.639	261.581	270.168	240.955	1.01623	0.602065	0.779168	0.255056	1
115751	249.396	242.639	251.485	261.209	248.655	229.951	241.162	254.826	245.663	239.584	266.182	241.22	231.349	227.365	247.044	236.78	248.764	227.185	0.973252	0.211236	0.46963	1	1
116251	260.696	254.609	253.934	248.592	262.223	255.01	249.122	250.481	248.35	249.334	268.228	261.206	229.215	246.504	251.419	236.345	240.832	250.291	0.978256	0.418887	0.65211	0.149786	1
116751	275.964	248.392	284.32	256.337	261.088	267.539	272.967	222.262	250.252	266.424	263.718	265.873	250.099	233.609	233.003	259.564	267.944	257.751	0.982414	0.680441	0.837917	0.235463	1
117251	244.662	216.185	251.485	252.915	243.239	237.31	239.774	230.585	221.765	253.136	248.424	245.022	244.02	229.159	218.281	251.413	273.236	252.223	1.03601	0.406675	0.641504	0.180864	1
117751	187.619	182.3	192.076	212.201	205.399	193.449	195.53	222.239	205.457	219.54	245.917	227.225	223.602	206.645	226.435	233.965	205.228	222.113	1.11936	0.0308328	0.164434	0.458514	1
118251	192.026	175.255	185.249	183.479	189.675	197.438	193.444	196.787	190.957	202.737	225.065	232.14	200.602	199.542	234.507	227.328	198.442	207.27	1.13103	0.000412139	0.0244879	1	1
118751	209	188.056	206.685	202.862	205.892	212.859	208.833	206.91	207.7	198.765	224.769	218.371	211.572	212.933	230.187	226.006	205.597	215.263	1.0512	0.0209879	0.134159	1	1
119251	218.485	225.819	218.545	223.99	244.431	233.105	217.844	250.351	232.158	227.098	255.722	235.81	226.966	230.771	233.528	237.649	237.5	231.268	1.02498	0.314676	0.565149	0.932871	1
119751	211.098	233.168	213.433	229.117	231.886	231.923	228.697	231.365	220.758	221.222	256.798	250.009	217.188	224.332	231.786	245.708	227.175	226.023	1.03387	0.291439	0.546832	0.606699	1
120251	206.181	226.734	212.845	230.845	219.433	212.922	215.019	228.903	214.114	219.396	248.138	231.528	234.638	208.776	247.035	242.103	221.783	220.615	1.05441	0.0419099	0.194037	1	1
120751	211.143	234.197	230.164	250.642	233.004	225.151	224.46	229.414	212.133	217.064	244.153	223.903	237.534	220.065	264.176	256.302	224.497	228.635	1.0322	0.298324	0.553547	1	1
121251	214.238	253.092	205.555	259.791	241.502	234.797	248.506	249.249	218.202	235.717	241.628	228.617	242.234	247.154	254.175	266.989	223.503	233.633	1.02293	0.49699	0.714424	1	1
121751	210.354	218.643	182.709	215.523	218.711	215.396	217.946	222.912	233.152	236.809	219.351	230.085	211.496	216.327	224.019	242.577	214.215	205.655	1.03368	0.354834	0.604297	0.654593	1
122251	234.888	224.964	209.077	236.946	227.477	248.493	236.989	249.006	254.186	248.08	239.383	247.277	226.201	226.315	241.914	233.383	227.131	229.984	0.998889	0.976532	0.99415	0.0647231	1
122751	245.207	224.125	237.754	251.229	251.28	248.562	241.348	241.987	250.929	242.254	252.208	259.057	236.315	249.733	245.019	253.333	250.748	261.818	1.02648	0.30268	0.556214	0.191119	1
123251	229.622	234.845	225.821	233.956	233.836	241.212	222.677	226.402	223.624	236.785	254.357	245.083	248.464	234.796	252.573	251.898	252.854	254.149	1.07672	0.0149964	0.122245	0.246979	1
123751	224.948	244.457	221.21	252.72	230.241	261.801	248.316	241.961	238.128	234.013	251.93	251.088	253.965	231.247	245.91	245.9	260.144	222.48	1.0152	0.552514	0.759042	1	1
124251	220.698	213.99	202.707	211.944	213.696	224.787	223.643	213.609	232.156	213.807	240.433	231.897	212.666	207.413	220.236	220.525	217.555	220.352	1.01413	0.600756	0.779168	0.463984	1
125251	255.385	253.757	240.281	255.487	248.339	257.18	238.194	238.581	244.436	271.612	249.376	256.499	251.837	261.795	251.676	246.374	257.153	242.92	1.02581	0.266249	0.520096	0.347662	1
125751	274.97	267.621	233.875	242.64	239.78	255.07	240.137	249.154	256.466	256.764	239.751	240.385	250.438	263.258	231.471	248.841	251.336	248.782	0.987305	0.57519	0.767595	1	1
126251	181.509	180.546	177.774	179.716	195.984	184.268	175.8	183.792	207.308	181.774	207.447	209.539	191.685	190.436	202.425	204.248	204.463	191.734	1.07023	0.0124945	0.114093	1	1
126751	166.542	185.494	180.548	190.995	185.457	184.713	178.773	196.252	191.125	192.224	220.242	214.15	188.493	184.154	214.743	211.544	200.64	197.958	1.09895	0.00287358	0.0553746	1	1
127251	166.892	176.641	159.663	180.474	176.773	174.619	165.116	185.454	176.806	173.73	209.565	202.65	181.32	172.734	200.511	207.218	191.401	178.125	1.09909	0.0072654	0.0822259	1	1
127751	161.125	154.576	151.91	182.779	171.959	149.167	166.844	180.673	178.084	188.264	196.146	185.742	175.193	185.024	199.421	197.224	189.312	179.432	1.13268	0.0182734	0.125278	0.664899	1
128251	208.041	197.998	212.476	221.964	217.776	195.469	215.01	206.547	219.334	224.512	218.201	213.515	207.403	215.902	237.616	232.085	225.853	212.258	1.04894	0.0369868	0.179398	1	1
128751	256.706	262.616	267.085	265.9	263.913	279.016	282.58	262.476	256.096	275.054	244.949	244.655	246.547	244.653	242.162	240.4	263.218	267.971	0.947096	0.0164135	0.123134	1	1
129251	251.154	250.286	256.257	267.72	272.671	266.634	267.872	257.695	250.24	263.912	248.064	245.619	241.587	237.036	232.583	233.923	265.908	251.973	0.948762	0.12305	0.357305	0.201131	1
130751	249.547	252.371	253.325	249.601	255.253	268.603	250.592	246.999	258.026	251.19	247.237	251.991	257.051	250.543	252.331	261.294	253.317	254.728	0.997971	0.858383	0.917582	0.830881	1
131251	232.04	238.113	244.716	244.277	251.569	254.295	260.775	245.536	248.888	259.41	269.516	259.746	248.068	226.503	254.178	256.824	240.231	248.379	1.01921	0.551701	0.759042	0.120458	1
131751	244.723	232.961	251.545	243.525	242.116	258.124	265.745	262.016	240.496	241.165	272.353	264.991	253.418	238.057	246.835	236.93	244.128	248.619	1.00234	0.930635	0.960265	0.608879	1
132251	256.363	228.498	257.042	251.597	259.114	251.751	242.643	244.02	240.414	238.536	249.087	255.727	246.139	269.811	249.533	259.383	251.383	239.146	1.01224	0.523367	0.74187	1	1
132751	266.159	248.699	256.021	253.366	263.129	260.974	254.703	256.168	258.84	241.177	248.27	259.729	257.819	265.378	254.712	255.115	249.663	261.925	0.98953	0.392366	0.631506	1	1
133251	258.926	238.864	247.845	255.071	257.1	269.71	244.691	250.642	251.772	239.186	255.423	251.06	261.513	246.906	253.304	241.477	256.842	256.841	0.994694	0.767757	0.874077	0.761788	1
133751	278.95	252.635	253.72	254.419	250.425	278.842	271.416	244.812	251.78	264.774	254.439	247.705	272.993	247.625	249.829	255.183	250.994	252.962	0.982672	0.397921	0.634715	1	1
134251	265.261	269.331	261.237	265.718	251.661	284	270.552	245.528	263.944	250.771	272.232	256.12	260.313	263.646	248.456	255.405	251.946	246.641	0.969838	0.100674	0.324797	1	1
134751	218.171	245.759	250.598	262.827	247.189	244.194	251.401	260.029	254.749	241.521	250.412	239.506	237.642	247.517	253.663	243.404	250.208	240.795	0.986465	0.557024	0.7623	0.699665	1
135251	220.557	218.473	229.981	227.074	236.181	232.323	244.822	245.012	247.075	237.719	246.414	240.181	224.968	245.845	246.911	244.118	218.25	228.503	1.01495	0.662387	0.829727	0.0832915	1
135751	256.02	236.118	249.834	260.508	260.571	254.754	249.134	253.908	268.473	253.567	265.161	253.95	249.667	251.513	248.904	257.116	236.906	246.664	0.988699	0.577965	0.767595	0.510015	1
136251	226.956	224.984	239.919	246.097	233.019	244.684	228.013	235.531	248.652	227.592	254.796	256.969	228.221	240.81	235.082	255.033	227.614	240.15	1.01805	0.409298	0.644216	1	1
136751	238.558	234.602	256.075	242.857	245.514	247.2	242.861	265.276	243.195	236.752	244.899	259.503	234.348	245.565	221.661	256.316	242.836	242.584	0.985708	0.515732	0.735434	0.967661	1
137251	282.947	259.854	263.774	285.45	264.164	298.162	285.76	292.247	275.487	274.168	277.753	280.637	274.979	259.912	247.165	267.408	281.104	278.359	0.973539	0.366853	0.608822	0.438613	1
137751	254.791	243.839	256.146	272.995	252.781	264.909	261.372	264.767	247.456	263.487	260.029	264.545	254.216	251.242	256.162	263.677	260.563	262.754	1.0076	0.685949	0.838027	0.304322	1
138251	215.755	221.349	224.721	228.981	242.434	231.863	241.453	219.314	222.306	231.415	213.947	250.341	234.308	225.653	230.479	247.833	230.928	215.739	1.01585	0.496737	0.714424	1	1
138751	202.271	186.329	194.626	188.216	204.971	196.873	207.579	156.368	193.567	202.435	221.908	219.845	202.975	179.544	205.671	227.286	208.334	192.761	1.07509	0.0598581	0.241123	1	1
139251	221.433	219.368	215.656	227.999	212.192	227.246	214.306	217.995	223.644	211.541	220.425	242.443	219.567	214.636	231.182	243.528	220.14	230.899	1.02754	0.176581	0.446519	1	1
139751	241.233	234.227	229.643	240.638	242.508	223.335	234.208	241.88	227.45	221.896	233.043	246.367	228.16	228.235	230.167	241.369	217.831	247.577	0.990319	0.594814	0.77817	1	1
140251	271.041	238.844	248.633	258.955	256.504	260.866	259.542	260.717	256.927	246.308	243.535	231.507	245.885	243.506	234.02	247.24	241.916	262.703	0.950083	0.00750355	0.0835942	1	1
140751	236.165	206.239	212.463	231.568	238.535	242.55	228.999	244.345	236.457	248.508	223.992	213.574	214.389	235.886	229.538	238.76	245.365	228.457	1.00055	0.986539	0.99531	0.553928	1
141251	188.385	161.297	188.815	192.937	193.798	194.946	189.475	200.351	197.154	214.062	209.589	211.876	194.097	196.598	196.83	204.812	211.466	195.47	1.07477	0.108804	0.336673	0.0864226	1
141751	169.406	170.387	179.255	182.27	185.291	178.746	190.633	180.985	190.228	191.985	198.068	184.581	169.314	181.852	196.038	202.434	203.933	185.233	1.053	0.185371	0.446519	0.250912	1
142251	184.815	182.397	172.314	187.118	195.291	173.931	200.258	182.997	208.119	191.437	193.565	178.479	183.333	188.487	197.383	220.648	200.695	188.964	1.03304	0.430825	0.664887	0.396233	1
142751	183.289	172.128	163.181	199.053	199.556	186.95	197.858	189.06	202.548	199.762	199.689	194.919	205.133	195.711	214.845	214.137	208.387	191.166	1.07683	0.144781	0.400113	0.0696543	1
143251	190.952	184.064	178.839	201.283	192.884	192.237	203.162	206.399	202.969	193.173	191.598	202.92	203.664	200.991	214.702	201.971	206.509	198.437	1.0349	0.350517	0.602213	0.0119359	1
143751	208.532	209.807	220.192	218.507	223.846	235.735	226.189	213.717	234.063	229.101	197.069	198.277	208.643	219.851	231.932	218.231	215.111	215.189	0.971273	0.310278	0.562024	0.846953	1
144251	240.383	242.208	232.153	233.464	226.928	246.686	227.053	254.879	240.479	232.57	236.311	208.904	205.641	220.809	252.55	239.065	238.072	237.543	0.966063	0.19463	0.454923	1	1
144751	238.494	215.824	215.991	216.938	215.811	216.484	224.324	230.55	228.156	213.068	229.798	214.698	201.376	210.99	242.038	227.47	223.96	224.28	0.992563	0.739603	0.854679	1	1
145251	238.827	234.658	242.568	232.947	239.311	220.987	248.631	240.039	245.908	224.135	238.849	210.369	223.783	227.659	234.71	229.21	237.556	218.602	0.953821	0.0594795	0.241123	0.92606	1
145751	248.328	244.801	277.653	278.238	272.609	268.618	248.36	266.437	265.105	255.797	253.249	235.739	248.881	245.331	232.151	249.412	263.561	245.719	0.940802	0.056836	0.23533	0.767145	1
146251	258.339	276.039	292.523	272.89	286.882	289.183	265.789	267.769	272.159	253.83	253.514	234.453	252.227	254.366	242.505	254.407	270.499	263.057	0.918312	0.0236724	0.142676	0.460857	1
146751	250.929	245.024	246.634	238.025	232.966	247.528	234.327	240.588	243.044	219.911	233.981	221.493	230.723	240.599	244.167	239.847	231.491	250.709	0.969646	0.257027	0.514988	0.156885	1
147251	232.008	222.104	228.736	217.817	241.499	232.657	222.133	231.074	230.513	229.768	220.38	220.687	214.298	230.745	228.988	240.045	232.103	247.031	1.00267	0.913578	0.94955	0.336513	1
147751	259.372	259.911	264.339	241.991	264.303	259.735	248.764	256.899	264.055	249.532	253.403	236.395	235.656	243.266	230.886	264.404	255.981	266.864	0.964222	0.2989	0.553547	0.0433154	1
148251	229.012	245.706	251.353	243.241	259.395	246.611	250.667	253.171	244.894	236.8	237.871	228.432	241.049	252.697	231.855	237.306	244.249	236.2	0.965113	0.0315954	0.164434	1	1
148751	220.602	233.726	250.084	238.912	241.626	240.782	233.082	237.801	234.527	224.97	236.832	235.728	229.968	251.705	254.804	233.77	228.244	229.907	0.997553	0.913592	0.94955	0.623237	1
149251	244.161	229.577	251.356	241.117	240.856	236.697	237.018	243.744	236.46	227.841	239.793	232.685	228.239	243.537	246.084	241.111	226.228	241.383	0.984227	0.261868	0.516598	1	1
149751	219.136	210.034	233.702	225.9	217.858	220.419	214.646	220.613	233.186	210.218	211.366	212.716	210.308	225.836	226.187	231.525	207.862	215.372	0.977898	0.228718	0.488251	1	1
150251	222.921	222.234	256	242.451	241.853	254.926	242.183	245.996	263.224	225.009	245.335	230.028	237.552	248.375	235.677	247.914	230.735	248.14	0.980371	0.450241	0.678937	0.916888	1
150751	269.713	248.028	266.172	256.331	266.556	264.617	252.358	280.283	273.688	249.493	253.82	215.911	249.098	253.684	240.27	249.805	246.575	258.299	0.932377	0.00442579	0.071048	1	1
151251	254.56	237.174	251.194	235.717	242.535	243.599	237.466	241.496	251.043	233.016	230.105	220.108	240.067	239.834	236.465	236.919	224.083	227.152	0.951232	0.0411067	0.192823	0.473102	1
151751	226.023	226.891	238.316	234.002	245.13	232.296	225.633	222.15	231.239	229.029	235.338	229.25	215.831	244.556	244.854	231.82	225.341	221.272	0.997892	0.910538	0.949142	0.971499	1
152251	241.939	234.655	250.145	246.243	254.808	249.316	257.508	235.83	238.472	240.958	230.391	233.075	236.817	247.357	253.854	242.022	247.976	233.312	0.980464	0.299901	0.553962	0.852066	1
152751	254.483	246.073	253.859	257.632	259.822	264.762	259.481	261.175	239.201	255.444	225.967	244.9	228.831	240.593	237.546	243.486	230.509	240.339	0.935174	0.00089374	0.0311505	1	1
153251	257.704	259.112	269.196	259.074	260.657	245.045	264.206	261.978	226.531	248.376	225.346	237.63	234.106	238.394	235.963	245.063	216.125	254.868	0.927227	0.00532118	0.071048	1	1
153751	264.321	248.977	255.381	259.223	263.403	260.271	267.293	254.854	256.062	248.172	248.847	247.188	255.443	251.08	240.051	251.463	248.623	256.841	0.964771	0.00216771	0.0468356	1	1
154251	242.529	239.252	245.291	228.354	242.812	248.664	241.991	257.774	243.818	238.045	237.265	231.585	225.911	236.522	231.986	231.901	237.899	240.66	0.964067	0.0103878	0.100842	1	1
154751	225.978	215.563	210.808	210.561	233.783	235.2	232.57	235.234	247.274	230.996	222.567	232.793	200.699	215.397	220.418	216.557	221.757	237.637	0.976477	0.534926	0.749317	0.153625	1
155251	219.874	215.466	217.878	225.378	236.373	243.091	224.888	236.17	250.943	224.398	224.925	226.254	209.713	229.844	221.444	240.919	228.505	226.76	0.981982	0.588105	0.770806	0.123897	1
155751	240.312	229.267	255.483	253.383	243.756	265.014	251.846	258.418	258.999	229.388	222.924	229.941	245.393	240.262	259.725	252.124	226.899	239.735	0.951213	0.183713	0.446519	0.191296	1
156251	228.74	224.69	237.944	248.048	228.984	241.242	227.478	244.401	250.835	227.676	232.255	234.841	227.531	235.521	249.677	227.228	220.506	233.707	0.979638	0.339051	0.59106	0.869096	1
156751	269.857	230.91	273.103	248.648	259.539	279.578	254.79	264.182	272.341	235.357	237.448	230.945	239.879	236.288	240.213	229.05	235.18	239.232	0.902524	0.000151633	0.0108114	1	1
157251	242.689	234.668	261.869	251.727	244.77	268.835	256.85	254.371	256.497	233.289	233.606	231.902	236.805	233.564	237.6	232.707	232.971	237.326	0.928483	0.000109095	0.00864275	1	1
157751	232.727	253.406	252.164	234.914	242.617	259.775	256.417	236.372	256.027	248.879	230.264	239.664	227.238	236.348	228.664	221.343	223.834	233.289	0.939357	0.00429523	0.071048	1	1
158251	237.374	221.239	231.047	230.856	248.006	245.132	239.25	228.315	237.393	228.727	211.638	225.192	238.685	219.754	224.693	226.838	223.169	240.318	0.962429	0.098315	0.320149	0.969218	1
158751	251.975	244.867	263.831	259.578	264.179	267.635	258.948	261.602	257.445	244.473	238.032	240.005	246.203	250.943	250.97	244.905	259.626	261.632	0.959971	0.114908	0.353144	0.109636	1
159251	284.596	265.008	297.167	280.216	267.261	284.379	274.413	275.333	278.536	250.364	243.812	246.165	250.271	279.807	276.545	243.412	262.21	260.796	0.922803	0.0325708	0.166748	0.519119	1
159751	288.432	252.888	292.438	259.667	269.155	283.45	272.719	247.738	266.554	244.871	248.876	243.879	254.512	258.246	257.23	247.911	261.425	254.585	0.93362	0.0310796	0.164434	0.999511	1
160251	270.434	276.337	317.348	283.105	295.215	284.163	302.907	269.298	291.67	272.141	259.016	275.635	285.997	273.591	263.445	267.618	271.376	281.065	0.945727	0.0181285	0.125278	1	1
160751	246.378	278.992	293.213	276.488	280.927	269.096	278.932	248.183	269.332	265.777	247.935	261.688	263.683	259.883	251.511	233.402	239.974	271.118	0.939968	0.0256572	0.149948	1	1
161251	215.755	225.278	246.817	219.516	232.373	228.999	237.673	217.967	241.282	236.19	250.124	229.431	243.939	211.948	236.846	228.528	226.873	239.398	1.01821	0.432657	0.666274	1	1
161751	185.9	184.004	184.427	180.918	195.471	200.766	184.136	181.667	209.095	206.323	212.744	204.456	206.904	185.96	207.085	212.995	203.379	209.284	1.08365	0.00178375	0.0410658	1	1
162251	148.442	137.609	128.026	136.316	143.938	145.974	133.092	145.148	156.117	161.676	158.025	175.267	151.946	144.94	177.588	198.159	154.332	155.269	1.1589	0.00233251	0.0480158	1	1
162751	185.797	174.069	191.22	176.8	192.456	187.584	190.435	179.512	188.824	197.705	196.448	208.281	174.77	182.802	214.028	209.809	189.329	176.886	1.05002	0.101427	0.325753	1	1
163251	219.014	213.205	216.068	227.158	230.013	232.69	227.612	198.641	231.02	232.663	229.745	241.808	210.855	208.942	228.162	242.725	212.832	214.177	1.01327	0.691415	0.841117	0.514846	1
163751	165.628	179.938	174.581	184.41	190.203	178.142	186.1	179.435	198.036	207.198	220.586	214.79	182.529	177.65	200.429	213.139	193.628	199.179	1.1055	0.100577	0.324797	0.038379	1
164251	179.209	191.32	205.829	205.646	197.978	204.123	213.954	206.79	208.936	217.851	230.06	222.415	190.168	219.331	232.167	239.636	204.622	212.51	1.08544	0.0126414	0.114093	1	1
166251	266.63	261.908	296.568	267.076	290.023	269.899	284.213	268.242	257.382	252.717	273.16	260.945	273.398	252.68	225.87	245.358	261.064	268.936	0.939961	0.0272449	0.154172	1	1
166751	261.636	257.826	265.093	265.973	263.379	265.047	266.158	246.799	255.583	239.431	264.564	246.212	257.021	244.327	232.18	255.541	240.269	258.734	0.953476	0.0102984	0.100842	1	1
167251	246.628	251.576	244.435	239.732	247.988	261.368	252.111	229.78	252.6	235.95	244.164	250.501	253.548	238.034	252.023	254.833	255.653	255.477	1.00627	0.697528	0.841117	1	1
167751	242.747	239.512	251.255	254.224	251.531	278.25	244.656	242.115	266.409	241.246	241.155	255.14	247.36	253.721	229.172	246.161	242.948	250.548	0.972146	0.178342	0.446519	1	1
168251	229.141	239.516	260.553	263.167	238.912	250.248	243.19	250.658	244.92	248.843	235.906	247.79	246.429	243.916	233.737	250.642	246.505	244.309	0.989989	0.552365	0.759042	1	1
168751	206.723	225.535	228.006	238.298	220.227	211.897	220.893	220.501	221.928	226.209	222.654	233.155	212.182	223.371	229.91	230.506	218.39	218.594	1.01051	0.545298	0.753484	1	1
169251	233.811	245.833	225.472	253.166	245.142	241.365	234.225	238.42	238.763	242.982	254.003	257.423	236.167	246.387	254.636	252.398	232.765	242.074	1.02905	0.190547	0.452867	0.695729	1
169751	231.27	245.158	227.86	235.815	240.532	242.941	232.59	253.69	246.007	237.983	249.473	247.103	242.467	234.919	245.445	261.895	236.639	232.494	1.0151	0.391836	0.631506	1	1
170251	245.441	245.843	245.146	230.361	247.487	274.649	264.89	254.782	267.778	249.777	246.853	246.496	241.75	236.434	245.642	266.613	239.909	252.72	0.977955	0.410304	0.644376	0.721355	1
170751	236.005	240.328	242.22	243.36	234.665	243.93	236.099	251.169	263.762	237.579	251.655	249.948	244.377	236.904	244.644	261.726	237.459	252.766	1.01164	0.541282	0.75137	0.937411	1
171251	205.469	216.509	217.533	220.63	219.601	218.372	205.53	211.065	238.21	222.393	240.465	239.546	226.071	226.575	227.38	233.994	208.352	236.742	1.05561	0.0205323	0.133086	1	1
171751	248.517	233.559	237.447	234.9	238.983	248.52	240.973	221.746	263.269	248.029	256.451	251.114	253.475	250.566	235.699	248.185	242.461	271.388	1.04126	0.0684834	0.266823	1	1
172251	247.218	234.582	235.725	227.618	234.833	241.51	233.154	223.173	246.568	236.139	236.953	250.921	232.555	237.21	237.568	240.737	247.809	254.486	1.02353	0.215499	0.469881	0.930049	1
172751	195.615	193.174	180.524	188.698	206.906	193.545	197.212	202.226	211.691	198.008	201.281	219.847	193.163	206.3	177.445	203.585	214.221	215.011	1.03349	0.394152	0.632453	0.319876	1
173251	207.102	217.958	193.875	212.32	226.618	227.111	199.016	229.095	227.456	214.933	227.122	236.748	230.995	218.795	206.443	237.322	230.38	230.791	1.04791	0.174384	0.445911	0.710216	1
173751	239.36	230.713	226.183	239.716	241.083	255.891	235.747	241.683	259.002	233.337	249.677	254.488	243.443	235.566	260.561	239.763	250.273	260.725	1.02695	0.203732	0.461146	1	1
174251	251.382	253.834	236.168	246.103	233.792	254.292	243.952	257.401	252.765	245.778	252.871	241.07	242.128	254.169	252.668	239.873	253.144	260.159	1.00546	0.71569	0.8453	1	1
174751	255.285	246.444	243.529	247.317	247.101	264.323	230.832	254.979	249.15	238.701	237.234	234.192	244.688	247.425	262.933	243.546	251.36	264.423	0.993543	0.792941	0.883258	0.477092	1
175251	281.327	268.289	266.385	259.383	267.984	267.873	242.602	263.156	259.919	267.906	260.579	242.06	246.871	264.479	260.701	243.107	244.377	259.769	0.963369	0.156497	0.41848	0.619374	1
175751	227.906	213.565	236.949	217.619	226.769	215.201	216.668	216.726	239.352	241.434	233.082	238.406	222.166	232.209	226.658	221.875	213.775	218.242	1.01845	0.528763	0.746551	0.26043	1
176251	220.166	214.06	218.781	220.179	221.92	217.425	218.961	205.274	231.077	217.106	228.095	228.878	227.816	220.524	214.171	218.937	233.955	233.659	1.0281	0.0830256	0.293056	1	1
176751	254.236	244.092	249.973	245.518	252.389	247.275	249.515	241.435	253.323	245.906	256.705	240.736	256.453	223.545	234.132	241.756	254.372	257.498	0.988089	0.490883	0.71283	1	1
177251	198.553	189.125	204.436	196.015	203.85	203.047	212.708	203.75	208.979	192.88	199.877	198.622	208.969	184.773	193.829	210.778	205.278	198.569	0.98523	0.527118	0.745705	0.507252	1
177751	204.369	215.83	214.793	216.784	227.111	220.065	227.748	234.375	224.239	201.743	216.937	219.299	230.427	217.56	230.371	226.635	232.73	224.647	1.00757	0.82115	0.8966	0.0307015	1
178251	235.206	260.341	239.534	228.697	254.69	254.295	243.091	242.864	259.438	225.793	225.499	248.008	242.192	239.164	240.531	240.532	254.437	246.547	0.975	0.227758	0.487661	1	1
178751	179.693	188.621	179.966	188.046	180.666	181.743	177.237	183.7	195.047	183.175	195.17	213.757	190.228	186.354	133.493	201.442	202.439	188.097	1.02383	0.656655	0.828663	0.562857	1
179251	185.707	170.858	186	193.895	177.204	179.573	183.798	186.659	199.015	187.617	188.52	190.09	181.916	184.131	141.027	198.711	191.433	197.894	0.999176	0.986551	0.99531	0.266859	1
179751	220.387	224.262	234.544	234.587	217.425	245.469	227.175	224.743	250.072	225.554	208.378	222.114	226.585	222.877	222.875	225.174	229.167	236.663	0.971483	0.160352	0.421659	1	1
180251	225.474	222.538	232.498	226.966	219.218	258.957	228.493	229.302	233.468	225.943	220.129	239.546	223.269	223.884	227.259	253.983	213.131	232.043	0.991465	0.726372	0.8453	1	1
180751	230.305	214.938	227.147	211.703	205.815	241.176	204.599	197.953	216.804	218.612	231.652	205.674	215.583	209.683	213.243	230.119	216.55	218.426	1.00467	0.872254	0.931013	0.775058	1
181251	228.573	223.29	248.156	229.836	215.372	242.117	210.788	179.072	228.011	236.312	229.65	215.982	231.452	205.293	202.689	219.751	219.425	207.227	0.981332	0.686406	0.838027	0.453797	1
181751	235.793	221.536	236.689	224.399	217.215	237.124	220.823	213.395	234.934	212.789	219.52	202.721	218.095	219.183	209.689	223.776	217.948	223.62	0.953687	0.0148307	0.122245	1	1
182251	223.521	216.883	222.293	214.744	213.938	231.809	227.309	208.805	225.591	211.056	226.953	220.08	214.525	215.474	232.844	217.763	220.21	218.064	0.996008	0.7938	0.883258	1	1
182751	205.302	224.312	227.346	214.6	228.783	233.012	207.497	174.84	212.05	211.7	215.694	224.787	217.1	199.262	245.957	209.748	218.809	215.897	1.01619	0.701725	0.842212	0.602265	1
183251	210.434	223.604	214.032	199.738	208.175	224.216	198.015	179.476	201.13	202.133	199.195	208.69	205.055	188.322	207.104	197.864	183.484	199.589	0.963749	0.378064	0.625428	0.172426	1
183751	209.372	206.637	209.205	196.102	195.503	185.263	194.91	187.114	194.717	189.512	190.345	198.105	208.745	188.527	179.645	192.14	195.38	198.047	0.978426	0.478083	0.705403	0.217693	1
184251	195.628	203.991	204.554	193.221	207.812	197.567	205.757	186.945	203.465	196.403	199.769	206.189	201.397	198.826	206.182	210.049	215.545	198.182	1.01868	0.250286	0.514873	1	1
184751	224.714	236.072	227.931	221.929	229.583	231.773	217.966	233.349	226.22	227.251	227.524	230.835	222.934	219.157	234.596	230.156	224.699	225.71	0.996743	0.765178	0.872915	1	1
185251	218.007	215.623	244.55	219.778	221.194	248.589	218.705	239.016	239.016	233.349	244.45	222.466	230.321	223.599	223.419	230.653	224.142	235.876	1.00184	0.933925	0.962267	1	1
185751	199.907	221.209	224.843	232.742	226.262	236.072	217.608	228.374	236.522	211.748	225.213	218.206	233.275	232.568	235.425	235.448	209.697	240.542	1.00918	0.772326	0.874077	0.392012	1
186251	248.796	254.288	251.048	242.691	242.266	267.885	251.814	266.376	248.057	235.821	232.146	251.954	250.135	254.007	226.718	249.267	239.253	264.711	0.969555	0.148617	0.408882	1	1
186751	238.542	231.445	235.15	219.224	233.945	252.65	211.565	246.748	212.773	222.611	235.293	243.423	227.61	230.041	218.033	224.334	231.406	230.17	0.990816	0.698375	0.841117	1	1
187251	227.383	217.711	236.151	228.081	222.274	222.863	212.906	239.118	213.493	208.431	241.171	233.376	230.324	214.174	232.965	215.106	230.046	230.33	1.00789	0.714843	0.8453	1	1
187751	215.14	201.172	216.075	209.885	216.003	205.807	202.589	222.418	217.456	213.511	227.596	226.739	210.051	195.545	200.015	204.683	206.934	209.304	0.993618	0.841762	0.909358	0.110272	1
188251	213.764	212.744	210.528	218.645	216.678	210.388	206.671	216.253	205.793	214.639	235.06	234.909	199.018	212.53	212.105	214.588	210.661	210.94	1.01726	0.597911	0.779168	0.050909	1
188751	200.148	216.255	199.463	210.756	194.913	196.963	209.592	208.099	201.583	210.407	227.976	228.286	204.604	211.501	222.646	222.855	212.773	224.295	1.06942	0.00164053	0.0403345	1	1
189251	224.56	213.228	219.431	210.291	215.118	206.621	211.067	223.477	218.754	220.48	241.591	234.446	215.51	218.866	222.63	224.147	232.496	222.33	1.0463	0.0963948	0.318192	0.271273	1
189751	208.506	206.774	209.002	213.307	206.378	205.723	218.932	204.91	219.565	227.083	233.217	226.701	214.951	213.341	217.627	220.83	218.891	217.404	1.05121	0.0783087	0.287805	0.0268193	1
190251	165.593	177.102	161.693	167.757	158.146	162.351	165.735	168.34	174.759	186.477	190.006	191.526	176.726	185.198	178.147	199.967	175.025	182.929	1.10958	0.00596594	0.0720968	0.940483	1
190751	154.838	153.32	158.662	156.838	165.871	157.37	158.295	163.968	159.877	170.857	185.625	189.735	186.513	180.468	145.226	196.255	175.233	184.95	1.13003	0.000991412	0.0311505	1	1
191251	194.858	184.315	178.738	186.236	193.751	193.608	190.199	192.609	201.327	180.274	207.127	202.791	196.951	198.466	213.316	202.811	195.462	207.202	1.05174	0.021074	0.134159	1	1
191751	199.336	209.039	206.952	204.066	229.164	227.225	219.945	222.273	209.61	197.089	212.088	208.352	212.385	206.774	231.29	210.32	213.479	221.102	0.992358	0.789099	0.883246	0.503324	1
192251	172.89	217.591	197.995	184.754	207.75	203.399	201.754	196.454	190.447	196.616	202.68	204.931	185.186	206.748	187.462	198.654	194.246	199.877	1.0019	0.941572	0.966978	1	1
192751	245.669	261.17	267.007	245.397	257.468	261.202	239.649	241.276	223.624	245.933	234.473	245.229	238.431	258.383	220.783	234.171	239.443	262.631	0.971913	0.400096	0.636759	0.527611	1
193251	271.734	250.112	278.058	259.732	254.188	270.266	269.964	258.989	242.819	250.828	263.837	249.936	250.214	254.169	248.081	239.036	263.394	259.473	0.967361	0.0867001	0.298318	1	1
193751	268.888	255.18	285.037	259.951	267.553	277.661	281.678	257.917	255.879	254.797	255.642	249.936	243.827	250.806	255.017	248.646	251.632	252.944	0.939206	0.000923095	0.0311505	1	1
194251	256.138	262.165	264.169	246.533	269.252	257.271	253.821	253.056	253.468	275.91	251.19	267.333	259.666	257.319	259.528	268.969	252.52	259.665	1.01564	0.268592	0.52324	1	1
194751	189.162	191.25	192.12	193.356	196.948	191.282	205.58	217.688	201.128	221.18	202.476	211.559	212.723	204.523	239.796	232.243	189.283	196.181	1.07391	0.0893759	0.303453	0.900452	1
195251	211.89	212.717	209.628	206.839	206.706	210.433	216.695	227.018	213.912	217.298	213.087	219.701	216.626	214.893	230.031	225.469	199.898	225.45	1.02433	0.168923	0.437972	1	1
195751	227.485	241.544	244.54	239.873	236.691	235.943	233.044	271.339	250.01	228.2	239.962	236.351	218.605	220.809	240.744	238.949	222.891	239.375	0.956623	0.116033	0.355071	0.978588	1
196251	231.764	228.806	230.57	221.558	227.978	234.476	228.886	249.886	228.555	221.674	233.453	217.371	207.515	200.811	217.296	227.541	222.78	224.382	0.947344	0.103976	0.32803	0.192682	1
196751	244.402	214.892	213.071	220.779	233.411	232.591	237.839	227.049	229.799	219.48	229.317	220.132	221.383	204.443	224.14	221.875	228.546	239.819	0.978237	0.306275	0.558501	1	1
197251	240.678	206.163	220.544	228.351	224.704	221.769	244.752	223.96	230.781	221.402	220.599	221.455	229.644	212.043	222.815	224.182	220.646	229.963	0.980921	0.317022	0.567931	1	1
197751	218.459	226.076	219.174	220.381	221.283	210.52	222.072	221.344	225.734	207.898	212.823	210.67	228.115	221.642	218.011	215.064	218.118	219.343	0.983195	0.394729	0.632453	0.0532476	1
198251	256.177	254.575	250.997	262.515	263.403	254.604	263.857	266.286	245.102	247.571	249.5	239.104	260.651	242.299	221.909	251.676	241.148	255.918	0.953511	0.0157736	0.122245	1	1
198751	227.864	244.31	249.82	254.559	244.77	233.865	251.834	248.19	228.233	231.804	257.099	244.745	258.13	240.553	217.051	263.466	222.308	255.719	1.0034	0.900835	0.945276	1	1
199251	253.839	258.357	246.285	279.434	252.074	255.795	245.334	259.983	244.24	236.531	258.657	234.622	259.475	249.942	224.147	261.787	247.612	260.603	0.973004	0.251027	0.514873	1	1
199751	261.951	238.41	254.901	276.461	273.535	258.169	260.703	260.676	261.04	255.98	254.749	238.062	263.88	250.74	241.85	258.106	274.918	258.936	0.979272	0.468315	0.697095	0.302515	1
200251	232.916	228.278	220.946	255.363	229.651	221.156	240.076	222.781	250.297	253.246	239.238	233.089	232.555	243.503	215.147	251.021	249.467	230.17	1.02188	0.396052	0.63315	1	1
200751	224.621	240.297	221.325	250.423	245.284	232.224	229.971	232.966	241.9	246.736	244.783	242.678	238.416	250.053	240.645	257.948	245.957	243.506	1.04328	0.0820234	0.293056	0.558474	1
201251	200.558	212.336	202.078	215.639	213.599	200.092	202.193	209.886	209.286	216.864	231.766	226.767	203.954	205.903	198.2	237.822	230.254	211.741	1.05232	0.239886	0.504784	0.0499088	1
201751	241.06	245.051	231.114	238.799	240.759	233.21	224.481	237.709	229.574	248.152	255.949	250.432	251.486	240.55	227.214	239.979	255.547	242.905	1.04263	0.0791291	0.287852	0.642068	1
202251	261.841	251.669	244.31	249.479	251.265	265.279	264.011	256.125	250.704	277.32	276.981	243.019	261.616	249.237	266.649	255.757	252.813	252.21	1.01783	0.347798	0.600436	1	1
202751	240.043	247.136	259.978	272.598	267.096	265.787	264.453	267.345	246.915	254.737	246.393	249.08	262.35	261.147	237.625	254.207	252.06	246.583	0.971189	0.262284	0.516598	0.40918	1
203251	222.385	225.829	225.99	252.76	229.17	239.526	232.747	255.332	238.982	235.983	240.666	234.627	237.567	242.844	235.724	243.478	231.098	241.965	1.01	0.696035	0.841117	0.245444	1
203751	226.007	214.01	213.011	224.58	216.504	219.86	223.713	223.983	224.883	225.667	231.387	232.003	220.319	225.799	218.612	229.982	222.39	225.116	1.02251	0.174209	0.445911	0.30098	1
204251	223.027	234.655	226.298	237.443	236.576	235.723	224.801	235.638	236.665	234.352	238.997	230.99	222.916	234.859	224.998	247.788	242.429	246.091	1.01559	0.562731	0.76608	0.0142634	1
204751	186.737	192.897	212.06	229.549	214.619	218.973	206.825	222.477	217.518	233.885	222.966	217.708	223.835	226.189	231.499	230.456	225.836	230.289	1.07415	0.0983348	0.320149	0.0816568	1
205251	192.129	201.723	208.911	215.712	218.304	209.591	223.925	225.049	207.612	221.375	232.741	230.197	214.071	221.129	240.117	228.407	223.53	221.005	1.06811	0.0597005	0.241123	0.380311	1
205751	226.158	218.232	228.063	229.081	229.946	220.822	240.903	231.669	232.375	224.476	241.946	237.082	218.258	217.791	224	239.694	222.536	238.99	1.00366	0.891161	0.942727	0.111274	1
206251	226.475	221.677	234.801	239.732	250.133	236.439	234.833	251.675	244.749	238.653	228.994	223.214	227.758	224.247	227.427	225.064	226.551	236.465	0.961626	0.156595	0.41848	0.184868	1
206751	204.337	225.438	216.995	228.916	218.026	226.383	225.709	230.158	221.697	227.356	227.67	219.967	231.005	226.803	216.148	230.988	232.516	222.863	1.01885	0.294903	0.550435	0.806595	1
207251	208.619	212.433	219.745	233.559	220.923	225.034	233.701	233.239	226.434	232.13	227.498	219.041	228.871	229.964	213.729	238.388	228.505	235.157	1.01966	0.506683	0.725431	0.061327	1
207751	202.117	183.175	206.946	211.048	198.261	204.475	206.636	211.664	227.968	207.988	204.264	217.672	212.224	199.927	212.613	215.743	206.728	212.169	1.02	0.482371	0.709135	0.487749	1
208251	167.594	150.734	151.87	158.107	155.023	149.945	155.843	173.119	178.178	174.82	178.584	188.364	167.567	166.992	190.628	201.371	176.832	173.606	1.12382	0.0193462	0.130131	0.950993	1
208751	184.158	168.136	174.073	175.348	190.604	175.247	186.705	191.259	190.84	201.89	203.51	195.867	171.768	175.613	200.365	210.528	189.08	200.486	1.06889	0.15671	0.41848	0.197162	1
209251	200.074	178.866	210.254	196.811	194.839	202.69	193.525	184.24	203.171	204.497	213.714	211.973	199.457	202.971	199.414	205.802	191.756	206.422	1.04054	0.0605651	0.242601	1	1
209751	206.361	200.059	205.085	210.892	218.368	212.667	204.038	205.632	212.932	203.324	228.378	231.714	212.584	193.822	200.603	228.397	203.201	214.07	1.02135	0.51835	0.737692	0.378738	1
210251	139.817	149.027	141.512	154.017	156.135	158.041	140.116	148.319	171.016	145.175	178.988	183.49	167.262	146.429	184.343	200.976	160.937	162.242	1.12654	0.0155216	0.122245	1	1
210751	118.599	132.571	130.089	136.038	134.747	127.367	142.06	122.429	155.035	142.356	172.848	175.03	155.92	133.307	184.912	184.062	149.779	146.236	1.20478	0.00184306	0.0410658	1	1
211251	178.987	181.472	185.841	179.668	181.761	176.176	192.917	187.743	194.404	192.179	214.597	203.854	198.637	183.615	216.686	204.809	187.038	203.402	1.08791	0.0018212	0.0410658	1	1
211751	183.658	182.965	181.529	190.886	191.48	176.57	177.484	189.896	197.717	190.844	209.75	202.041	190.416	183.364	208.757	207.882	175.605	199.321	1.05729	0.0369252	0.179398	1	1
212251	166.125	168.259	160.533	185.392	179.87	179.723	182.329	177.653	185.981	188.707	200.356	183.271	188.998	179.43	182.646	197.063	165.478	183.839	1.05292	0.208017	0.464941	0.203906	1
212751	205.478	200.263	218.653	203.955	204.974	217.714	200.689	220.741	225.796	216.391	228.426	214.754	235.143	213.566	204.685	223.476	213.626	225.332	1.04064	0.0743411	0.278975	1	1
213251	181.958	199.628	205.839	194.987	196.099	205.001	193.839	191.305	208.475	197.963	215.282	215.055	215.734	205.963	189.347	201.91	214.045	212.921	1.05126	0.0280415	0.154422	1	1
213751	163.556	190.314	185.682	186.306	188.22	191.97	192.664	187.497	182.864	199.714	213.653	214.103	182.043	199.448	182.744	207.629	190.833	203.6	1.07471	0.109076	0.336673	0.217484	1
214251	168.095	181.599	171.868	171.122	186.881	173.75	168.956	179.167	183.18	188.41	211.763	202.17	176.62	188.242	207.705	215.272	171.968	189.448	1.10538	0.00441752	0.071048	1	1
214751	172.521	172.539	165.833	171.236	179.752	168.141	180.266	167.11	174.375	165.504	200.974	195.74	182.493	180.614	198.197	203.424	174.981	184.504	1.08678	0.00529301	0.071048	1	1
215251	223.345	231.896	220.253	233.41	234.515	204.424	240.213	228.455	218.552	223.5	230.118	235.276	218.838	225.916	229.182	219.595	209.181	220.9	0.988916	0.577722	0.767595	1	1
215751	232.768	227.676	233.601	237.159	222.999	226.915	227.804	226.98	234.567	228.598	230.578	238.954	216.423	229.892	218.583	215.799	216.615	215.487	0.971243	0.253484	0.514912	0.0620124	1
216251	204.75	210.706	199.923	212.195	194.748	204.43	205.03	196.498	207.308	195.753	219.232	213.449	196.954	215.069	213.983	207.837	204.607	198.437	1.0162	0.362679	0.605598	1	1
216751	217.773	221.693	214.441	226.035	213.08	213.307	231.091	215.241	215.628	226.437	233.854	224.898	217.804	223.913	219.086	203.969	241.403	220.778	1.02228	0.249414	0.514873	1	1
217251	229.968	222.709	224.447	220.422	217.038	225.65	243.198	223.61	210.439	225.218	240.166	223.96	218.025	232.274	207.174	213.555	218.384	224.025	0.992714	0.71834	0.8453	1	1
217751	225.619	230.048	232.095	224.802	217.439	220.609	251.252	220.431	232.583	224.123	232.099	214.95	219.255	222.883	211.618	225.311	211.203	229.522	0.968896	0.179197	0.446519	0.898715	1
218251	217.154	223.688	216.18	221.55	216.599	224.634	224.175	215.737	242.677	225.646	228.151	216.774	216.181	209.752	197.981	217.81	214.681	225.776	0.975209	0.35851	0.604297	0.36113	1
218751	171.857	188.026	178.724	188.765	181.197	186.051	170.434	181.01	200.143	187.488	209.404	197.115	174.716	189.4	173.29	198.546	188.084	192.282	1.03895	0.293981	0.550153	0.470959	1
219251	197.055	213.495	211.702	213.107	204.957	216.439	210.136	210.285	213.522	200.869	230.325	231.672	207.854	200.378	207.956	220.59	224.344	215.204	1.02565	0.359836	0.604852	0.558422	1
219751	206.713	213.766	210.196	221.547	208.567	206.369	210.154	217.176	220.909	202.591	205.567	210.021	211.835	208.017	202.981	192.695	212.653	216.899	0.97278	0.0773633	0.285803	1	1
220251	184.492	197.28	176.438	181.575	184.026	187.016	190.886	192.335	202.061	187.132	177.264	173.151	189.439	183.929	176.79	187.754	183.871	197.369	0.976764	0.389077	0.631146	0.416214	1
220751	205.478	206.436	193.635	199.454	197.612	187.067	206.479	206.861	214.171	197.741	197.151	195.625	201.597	199.907	201.071	210.841	194.431	212.656	0.996603	0.896305	0.943967	0.143252	1
221251	188.61	185.678	186.159	188.587	188.495	175.773	186.734	188.873	185.406	189.096	197.653	191.82	187.196	182.848	194.84	189.425	169.774	192.906	1.01269	0.451489	0.679138	1	1
221751	175.802	182.41	183.054	180.13	182.846	172.966	186.935	178.525	175.001	180.759	198.232	187.623	189.711	174.363	197.946	197.066	181.617	199.028	1.05482	0.010466	0.100842	1	1
222251	180.703	172.753	181.512	174.054	177.015	186.123	184.249	180.678	165.511	174.191	201.056	193.871	186.574	158.046	184.397	202.358	162.821	168.825	1.01843	0.581402	0.767595	1	1
222751	194.64	184.455	200.573	116.522	140.982	199.473	209.269	88.119	119.176	174.568	176.883	190.355	161.972	118.424	116.581	214.148	127.504	117.929	0.962259	0.790988	0.883258	0.720219	1
223251	187.879	188.617	184.231	153.186	158.093	180.757	205.69	162.769	157.657	186.42	195.562	187.88	185.697	159.369	158.616	203.759	179.59	166.503	1.0282	0.622713	0.792847	0.598049	1
223751	150.665	152.465	146.038	156.695	150.215	148.451	155.915	153.701	166.775	160.331	178.853	171.435	156.682	159.078	174.631	179.629	173.354	163.238	1.09871	0.0162094	0.123134	0.83734	1
224251	211.82	195.907	210.051	207.981	206.051	215.08	209.802	204.471	231.464	202.378	220.824	214.336	204.728	206.109	213.917	228.684	218.487	195.165	1.00634	0.781417	0.880174	1	1
224751	246.849	217.274	249.34	246.855	225.465	238.916	231.953	242.069	244.146	235.112	238.437	230.804	229.487	234.417	228.483	230.748	216.919	229.637	0.967883	0.0855409	0.296071	1	1
225251	248.822	215.607	229.254	218.672	221.291	225.971	231.871	234.937	230.291	218.98	226.781	211.136	216.864	223.591	223.419	221.415	207.531	236.748	0.965843	0.0940202	0.317708	1	1
225751	228.31	208.21	228.256	228.941	224.563	215.54	230.768	242.578	223.505	214.451	221.437	226.266	200.92	217.215	231.159	213.921	213.641	230.496	0.969879	0.155085	0.41848	1	1
226251	176.659	184.849	199.061	204.975	199.397	202.269	197.994	201.893	200.695	213.062	212.638	242.085	200.173	193.833	207.645	197.103	208.445	204.528	1.0632	0.215238	0.469881	0.0760343	1
226751	220.817	210.876	203.292	213.269	201.907	223.666	198.614	204.898	214.154	208.467	244.108	240.844	219.645	211.332	218.863	214.982	209.058	206.557	1.04354	0.235696	0.500153	0.499334	1
227251	236.807	230.65	226.274	232.274	226.751	227.637	214.149	219.273	221.637	210.676	248.313	243.665	225.621	221.959	230.727	231.098	217.702	239.337	1.01653	0.440056	0.671863	1	1
227751	222.812	232.236	246.072	242.088	241.319	235.849	230.437	233.48	233.687	225.658	231.279	249.534	226.434	223.622	222.71	241.737	249.148	240.038	0.996308	0.892717	0.942974	0.154592	0.475466
228251	247.125	247.717	245.487	238.331	232.521	232.822	240.391	234.582	235.324	233.612	235.005	239.459	227.045	228.012	228.33	243.193	237.076	250.176	0.984964	0.573975	0.767595	0.000666853	1
228751	251.414	239.579	230.553	232.777	233.521	242.82	252.986	220.669	229.172	230.424	234.484	229.854	236.802	231.998	232.596	249.291	221.777	227.473	0.981818	0.335909	0.58846	1	1
229251	250.342	238.126	231.723	225.941	236.506	235.05	237.941	216.514	225.623	245.706	228.236	231.246	226.655	236.545	244.667	246.284	227.5	221.028	1.00482	0.806259	0.888505	1	1
229751	217.407	220.447	217.936	214.714	211.401	223.029	217.861	217.01	217.382	218.8	221.675	224.872	225.83	229.824	228.737	231.48	204.065	219.048	1.02409	0.0981495	0.320149	1	1
230251	183.828	175.164	185.513	188.974	185.787	178.921	192.99	193.404	196.718	200.453	207.63	220.346	207.905	207.621	212.652	223.866	181.849	196.908	1.10583	0.0165144	0.123134	0.995942	1
230751	151.374	163.175	162.285	167.665	160.438	141.137	152.657	173.321	175.038	183.01	202.643	209.499	191.168	179.772	184.194	208.658	179.935	174.918	1.18431	9.19678e-05	0.0081995	1	1
231251	191.057	193.525	200.18	211.341	190.046	178.1	193.805	207.935	218.295	222.102	220.919	234.528	203.794	207.98	215.354	232.351	203.479	204.842	1.09027	0.0528694	0.225724	0.649253	1
231751	155.245	159.911	154.914	178.661	159.535	159.207	167.045	148.045	167.173	190.314	194.348	196.478	172.724	175.716	199.955	199.206	185.128	184.364	1.17141	1.22467e-05	0.00404984	1	1
232251	148.843	145.777	148.903	165.317	169.175	156.967	172.913	144.926	167.478	165.004	190.535	185.089	178.056	171.302	179.746	185.811	170.946	176.483	1.12862	0.0168788	0.123134	0.689129	1
232751	154.616	145.67	149.431	148.512	154.937	155.473	162.791	136.879	169.678	175.371	180.892	172.622	172.518	171.391	156.28	193.809	162.364	172.918	1.13075	0.000666591	0.029705	1	1
233251	209.145	188.34	198.144	173.319	186.878	208.452	212.278	132.082	178.719	201.255	199.562	198.545	202.455	147.898	166.827	216.538	200.974	177.485	1.01433	0.824607	0.898534	0.916869	1
233751	205.456	188.657	189.62	184.107	185.84	206.985	194.154	139.561	178.813	183.456	193.338	206.868	191.83	169.671	173.471	204.417	207.312	175.061	1.01926	0.72273	0.8453	0.635936	1
234251	200.642	202.134	197.704	218.604	200.267	200.615	194.698	199.285	212.338	200.181	198.103	219.4	194.134	191.363	210.636	203.129	215.446	193.414	0.999737	0.990046	0.99531	1	1
234751	161.859	152.805	165.691	163.969	151.566	165.153	159.715	159.046	170.6	161.277	191.886	196.45	168.374	160.898	169.106	183.491	172.452	176.03	1.08933	0.0478231	0.213112	0.777064	1
235251	157.664	166.983	186.829	188.649	176.393	185.732	177.359	170.429	172.864	176.469	210.028	204.592	175.925	175.542	195.558	189.702	185.195	178.364	1.06853	0.11756	0.355826	0.74385	1
235751	200.513	216.218	225.631	204.277	217.068	216.22	205.536	195.025	210.163	207.958	246.983	235.808	212.817	212.034	220.875	213.469	213.008	216.298	1.04686	0.183399	0.446519	0.645174	1
236251	225.291	215.53	212.354	215.269	220.808	217.302	200.849	207.094	219.554	212.415	242.646	233.355	220.223	214.436	219.073	209.819	226.539	220.679	1.03368	0.195878	0.454923	0.769936	1
236751	183.863	176.735	165.221	182.535	180.186	181.888	175.058	180.478	176.954	184.615	198.079	202.913	181.477	177.869	190.577	197.24	205.504	190.855	1.07874	0.0441364	0.200441	0.300638	1
237251	142.954	140.996	133.61	142.428	143.944	136.412	142.639	137.641	152.485	153.979	152.097	182.032	150.866	152.691	160.256	169.147	150.52	145.839	1.11336	0.00152683	0.0388798	1	1
237751	233.073	214.751	221.224	215.964	203.069	216.653	213.122	204.491	228.93	215.082	217.307	228.556	219.993	199.579	223.037	220.754	219.463	221.596	1.00722	0.71743	0.8453	1	1
238251	234.459	236.192	216.508	227.686	217.501	231.833	214.204	221.915	228.387	226.91	232.852	233.075	228.598	221.785	213.316	227.652	234.5	222.554	1.00619	0.719922	0.8453	0.929857	1
238751	208.689	216.749	214.901	210.245	206.558	223.705	208.556	213.545	219.073	219.722	224.994	220.056	210.683	214.014	200.963	224.266	210.242	211.371	1.00743	0.694924	0.841117	0.562085	1
239251	233.92	215.613	232.478	218.734	217.1	222.19	214.745	218.023	231.857	214.96	232.485	230.724	218.672	217.663	211.04	220.33	220.011	206.684	0.983992	0.442382	0.67285	0.742201	1
239751	231.421	219.412	224.792	219.299	218.837	204.325	212.953	192.307	214.786	206.377	223.696	229.085	207.89	203.27	208.738	198.735	204.897	203.955	0.973434	0.48655	0.711063	0.0931623	1
240251	185.255	191.778	185.682	176.971	189.672	185.871	194.247	173.833	179.812	185.48	192.688	205.373	177.917	174.957	187.344	183.981	193.569	183.02	1.01275	0.622133	0.792847	0.586711	1
240751	151.191	157.152	156.68	165.676	179.319	164.101	164.147	176.469	167.802	182.498	177.087	187.778	171.176	161.438	172.807	174.294	181.389	162.328	1.05953	0.199398	0.456256	0.068596	1
241251	135.695	137.933	137.192	143.377	142.587	130.099	145.481	151.305	146.014	169.518	172.732	174.466	157.692	145.402	167.097	159.1	143.804	145.054	1.1301	0.0710626	0.26997	0.0183774	1
241751	131.731	140.084	148.737	146.034	153.686	137.055	148.705	158.519	153.014	164.289	167.608	177.386	155.691	162.947	181.161	172.399	151.367	152.855	1.12761	0.0204235	0.133086	0.740385	1
242251	151.05	153.103	154.122	162.525	167.364	141.823	153.547	155.32	166	174.224	158.438	187.047	155.848	162.838	191.032	183.707	160.397	159.436	1.09119	0.0166762	0.123134	1	1
242751	205.992	182.631	197.576	192.601	199.922	186.31	205.641	189.645	199.385	214.837	195.731	218.744	194.27	194.407	199.411	208.39	186.725	197.104	1.02837	0.296874	0.552667	0.912655	1
243251	214.139	201.486	202.934	199.887	202.505	196.118	202.685	203.568	197.618	207.665	207.074	213.842	203.755	201.002	200.686	208.374	190.279	201.034	1.00701	0.710333	0.8453	0.361216	1
243751	169.942	173.31	154.285	164.335	159.742	166.388	162.564	170.708	165.602	156.138	178.301	184.738	173.138	177.67	161.906	178.231	163.395	172.209	1.03958	0.0950637	0.318192	1	1
244251	181.775	176.411	172.487	190.575	187.058	180.234	183.583	189.709	197.501	172.766	206.088	201.764	187.523	175.122	165.829	190.468	180.372	184.812	1.00326	0.92947	0.960265	0.398871	1
244751	165.763	165.223	155.881	169.147	170.06	156.483	157.551	172.881	178.386	162.148	175.218	187.614	172.808	180.1	159.265	186.785	158.097	165.361	1.03756	0.195294	0.454923	1	1
245251	163.075	143.535	148.301	151.533	154.94	150.537	146.252	121.683	166.171	157.407	161.011	166.537	152.242	163.78	141.3	167.731	146.538	158.656	1.05139	0.160857	0.421659	1	1
245751	176.091	189.172	198.073	192.052	184.401	188.294	187.872	172.145	197.373	196.642	193.444	199.737	185.742	193.52	182.846	197.54	186.361	203.631	1.03203	0.127121	0.362268	1	1
246251	181.043	182.26	201.486	206.009	174.295	185.212	191.593	204.299	207.49	188.258	190.776	208.425	188.324	188.853	196.007	202.029	200.13	208.894	1.02192	0.494234	0.714424	0.691976	1
246751	188.35	177.85	180.446	180.014	179.525	174.769	171.68	193.749	178.147	193.865	183.333	189.429	177.361	189.617	178.017	188.888	188.09	181.081	1.02779	0.10888	0.336673	1	1
247251	231.851	227.703	228.696	236.548	224.925	213.121	220.236	226.047	222.198	225.742	215.285	215.928	238.54	224.455	201.087	209.385	228.013	228.75	0.97827	0.284184	0.538891	1	1
247751	225.558	226.734	207.067	218.81	194.388	208.551	211.862	213.829	213.826	218.115	222.73	213.193	225.981	219.063	217.747	211.412	210.567	212.913	1.01619	0.489417	0.712152	0.470677	1
248751	220.435	210.94	217.662	226.663	205.464	208.091	223.666	215.435	224.04	225.042	219.756	218.726	214.325	212.319	188.94	212.579	208.205	223.933	0.985366	0.571236	0.767595	0.568875	1
249251	244.084	225.011	224.268	251.735	246.493	222.926	246.862	245.779	238.868	235.061	218.828	210.581	251.499	226.963	214.886	218.1	223.158	230.249	0.94562	0.0339947	0.171902	1	1
249751	205.799	201.532	203.817	199.394	190.09	228.695	226.189	170.562	173.456	208.206	191.982	208.571	208.34	168.273	161.178	199.401	181.491	188.882	0.95376	0.31447	0.565149	1	1
250251	152.705	163.499	170.728	118.072	118.946	179.254	159.069	84.647	95.003	165.845	159.453	189.784	155.237	103.963	103.217	179.889	112.232	109.21	1.02972	0.853982	0.915623	0.345589	1
250751	218.886	208.247	219.566	223.714	208.75	211.536	196.979	205.074	191.281	212.975	209.563	207.162	221.84	197.676	209.155	216.101	214.742	216.208	1.01135	0.717436	0.8453	0.115228	1
251251	194.926	196.855	193.993	195.91	196.341	205.888	191.183	210.475	193.857	196.397	192.225	202.923	207.869	214.154	193.292	223.605	216.831	209.337	1.04339	0.211432	0.46963	0.199577	1
251751	197.822	212.359	182.276	213.513	213.566	219.058	200.892	222.983	213.732	183.782	209.581	214.879	216.211	226.523	194.048	224.092	221.643	214.121	1.01529	0.69107	0.841117	0.551391	1
252251	253.431	255.01	256.42	260.649	264.108	277.059	260.243	275.734	271.744	249.511	256.124	264.688	254.116	257.179	242.626	255.468	280.213	260.564	0.977296	0.379639	0.626579	0.274546	1
252751	279.265	280.669	281.468	253.017	266.353	271.588	274.099	260.428	272.791	271.118	268.234	268.518	262.214	268.613	242.654	268.332	260.78	271.944	0.976525	0.353447	0.604297	0.192613	1
253251	266.855	270.049	270.6	251.567	243.328	256.191	259.728	230.782	247.707	246.532	241.171	251.422	244.217	258.745	226.938	238.999	242.452	260.297	0.962542	0.254592	0.514988	0.341017	1
253751	289.654	311.37	325.713	294.624	287.543	324.934	298.199	287.057	288.533	260.371	258.567	274.961	292.71	289.21	241.341	254.014	287.084	300.009	0.907905	0.00528582	0.071048	1	1
254251	335.416	327.947	322.381	294.148	310.653	315.868	315.22	298.302	310.383	284.259	268.403	281.946	301.358	294.912	267.39	270.804	294.57	297.463	0.904882	0.0180931	0.125278	0.417071	1
254751	289.507	266.923	251.271	269.251	277.113	262.351	268.745	257.971	260.269	249.723	233.942	256.207	262.208	252.948	245.852	257.49	254.02	257.506	0.944452	0.00584294	0.0718279	1	1
255251	225.888	218.409	217.12	225.153	208.251	210.412	208.21	231.93	201.893	219.908	206.609	223.48	225.183	214.941	206.701	220.583	209.899	225.957	1.00308	0.87603	0.932253	1	1
255751	226.488	211.925	247.003	206.485	228.424	204.478	227.702	237.395	216.975	228.814	202.558	215.406	245.958	225.976	213.761	228.302	218.285	227.833	1.00001	0.999756	0.999756	1	1
256251	237.416	242.018	253.47	236.486	248.614	236.962	253.208	251.103	234.589	253.115	221.903	216.226	243.295	231.681	207.963	229.624	234.658	241.353	0.948015	0.031539	0.164434	1	1
256751	248.915	255.357	245.937	241.861	247.623	257.568	269.877	251.159	253.391	252.558	233.294	207.228	242.851	254.435	210.922	226.143	251.712	248.667	0.936665	0.0281555	0.154422	1	1
257251	245.781	252.414	230.78	246.703	243.667	249.01	230.326	232.209	253.286	239.054	224.309	220.541	235.028	234.34	217.7	227.586	251.061	250.011	0.961292	0.151979	0.412019	0.857687	1
257751	237.259	223.34	223.828	236.897	224.869	231.572	206.956	214.105	217.385	217.115	217.609	208.074	226.247	220.21	203.7	226.312	214.924	219.17	0.968828	0.303464	0.55622	0.160434	1
258251	205.312	191.043	209.858	209.309	215.121	195.923	197.418	202.123	213.954	197.612	208.463	204.261	202.63	219.737	192.971	206.902	190.918	189.716	0.985408	0.496414	0.714424	1	1
258751	201.908	214.361	210.832	219.83	224.179	201.235	187.686	226.121	213.177	198.049	213.042	207.005	199	209.09	209.021	202.9	205.255	209.034	0.97529	0.257237	0.514988	1	1
259251	226.507	231.852	230.465	227.796	236.352	228.421	224.324	226.098	218.446	222.21	238.408	222.093	233.755	233.347	244.104	225.064	235.956	237.079	1.02037	0.276	0.530425	0.50113	1
259751	248.014	238.123	240.298	239.843	239.759	242.18	247.435	250.561	244.217	255.126	250.735	242.64	248.134	259.98	251.231	254.304	254.237	248.084	1.0338	0.0241926	0.142676	0.879374	1
260251	231.126	245.596	215.899	221.158	219.876	227.357	227.879	242.276	240.015	227.245	231.953	231.345	234.84	249.109	238.286	234.05	233.246	240.981	1.02408	0.3353	0.58846	0.435015	1
260751	244.38	253.543	239.916	238.636	236.27	242.219	241.47	253.987	245.321	230.987	237.324	226.146	248.902	265.737	242.597	245.789	243.961	239.862	0.993425	0.818422	0.894992	0.0600666	1
261251	264.282	266.923	248.207	276.209	272.921	275.896	271.745	279.347	282.102	246.978	266.957	256.341	270.669	278.167	264.633	266.518	270.713	252.016	0.973482	0.360536	0.604852	0.0990095	1
261751	253.771	236.847	236.344	245.713	251.115	253.33	248.209	248.584	235.825	248.906	251.465	239.72	245.072	245.132	245.763	249.307	232.531	244.86	0.99684	0.805241	0.888505	1	1
262251	250.827	228.916	229.775	232.601	233.842	226.804	224.868	223.607	219.594	240.461	238.638	228.951	244.752	239.224	249.435	242.785	225.141	221.209	1.02886	0.321045	0.572222	0.232153	1
262751	261.781	257.539	250.172	251.908	253.545	264.921	252.425	241.828	254.618	263.34	254.328	274.349	260.122	265.355	258.33	256.018	257.595	259.468	1.02629	0.0415736	0.193739	1	1
263251	298.295	263.315	271.151	261.893	268.647	291.299	277.314	276.363	274.681	275.38	268.771	271.794	273.927	264.938	259.598	247.553	271.085	265.356	0.965945	0.076378	0.283633	1	1
263751	277.969	229.551	259.474	250.453	257.808	247.675	256.376	267.278	258.635	259.395	259.434	256.071	263.719	254.537	257.586	248.359	253.499	252.276	0.999851	0.993645	0.99531	1	1
264251	251.581	254.008	251.353	247.588	264.636	254.986	267.857	229.013	256.767	272.935	255.418	250.244	269.091	241.392	232.819	264.643	243.337	233.771	0.993793	0.803459	0.888505	1	1
264751	291.341	281.15	260.746	254.248	279.089	287.575	264.194	215.75	261.843	260.398	241.38	248.123	276.188	251.165	211.892	245.961	255.067	247.673	0.934018	0.143158	0.397165	0.983794	1
265251	209.745	200.373	186.66	194.427	202.031	218.099	204.835	177.305	208.509	193.951	192.421	179.213	199.345	202.158	174.562	184.255	186.534	205.045	0.953107	0.103021	0.327918	1	1
265751	186.993	188.317	178.893	182.587	193.621	192.538	180.412	170.47	187.376	192.206	176.746	166.192	196.304	184.234	184.448	206.834	186.059	199.609	1.01892	0.606315	0.780329	0.287714	1
266251	243.821	256.266	250.443	242.564	244.685	238.435	238.857	243.209	245.244	244.009	235.071	225.013	252.043	255.838	242.219	252.277	238.801	236.753	0.990243	0.668226	0.829746	0.197984	1
266751	251.808	255.995	281.221	260.5	246.487	263.713	273.496	243.212	262.162	251.959	251.695	258.927	267.241	265.543	254.934	245.839	246.259	268.126	0.987997	0.541661	0.75137	1	1
267251	268.208	278.812	280.548	273.902	255.46	284.8	299.002	278.478	277.75	275.707	259.5	273.056	289.137	272.347	257.446	267.61	277.204	283.481	0.983391	0.390372	0.631146	1	1
267751	262.271	271.529	269.808	258.071	264.297	252.593	254.476	267.641	264.889	271.381	241.369	258.267	281.837	285.564	258.18	279.453	267.115	256.249	1.01431	0.562164	0.76608	0.677934	1
268251	214.418	243.725	244.364	239.483	229.438	226.005	224.172	219.02	218.973	242.332	222.717	241.408	245.205	247.428	228.918	245.042	231.371	231.031	1.03683	0.0957635	0.318192	1	1
268751	214.549	253.052	230.759	247.539	240.797	232.209	241.56	234.625	220.453	235.827	219.134	238.573	244.326	240.65	238.356	242.899	239.335	235.963	1.00923	0.656411	0.828663	1	1
269251	240.909	252.929	227.41	234.635	243.959	231.905	232.735	241.992	233.989	247.912	219.222	234.914	239.526	248.307	246.046	249.604	240.562	245.428	1.01451	0.414228	0.646269	1	1
270251	192.215	199.638	188.48	213.635	223.872	196.792	191.503	209.13	219.36	201.561	207.389	206.61	217.683	218.41	226.985	211.304	205.006	197.265	1.03139	0.448233	0.678535	0.134609	1
270751	270.502	270.34	243.042	261.512	242.729	272.087	236.262	240.317	273.497	244.73	249.09	242.73	252.656	261.869	262.062	241.121	250.868	254.764	0.978185	0.351619	0.602654	1	1
271251	278.084	286.135	289.509	278.003	265.258	260.559	263.499	276.987	260.673	268.343	234.74	245.424	269.447	267.617	260.507	254.823	258.498	254.43	0.941076	0.0959857	0.318192	0.162289	1
271751	301.73	308.153	316.072	294.911	299.81	282.954	263.121	289.534	269.016	269.235	259.262	275.109	278.05	291.261	271.354	270.946	280.934	273.509	0.940715	0.180203	0.446519	0.0160677	1
272251	264.484	263.883	266.358	263.346	273.738	254.86	246.198	260.482	255.293	252.441	249.069	248.126	263.795	270.367	267.062	254.752	257.906	254.733	0.98706	0.6114	0.78442	0.0136362	1
272751	273.421	283.703	245.954	269.644	275.523	248.484	234.19	277.946	265.017	266.026	253.879	257.594	272.005	274.156	276.539	271.42	263.666	262.598	1.01011	0.672838	0.832871	1	1
273251	295.755	299.694	280.748	298.503	287.867	278.169	294.097	299.404	267.391	265.131	271.211	273.181	276.034	272.749	269.577	290.824	288.259	281.341	0.956442	0.0822207	0.293056	0.632078	1
273751	262.265	260.585	272.633	262.44	247.463	255.572	250.659	257.521	245.381	249.34	266.729	258.528	274.405	254.763	250.7	260.852	247.387	252.452	1.00028	0.988394	0.99531	0.70685	1
274251	264.132	251.228	261.436	232.926	228.011	248.216	235.863	246.763	252.802	248.238	259.066	255.73	268.559	255.111	263.251	243.291	252.488	257.266	1.03674	0.285807	0.540531	0.060347	1
275751	265.912	271.229	262.451	278.936	278.691	274.73	281.658	274.31	287.679	294.332	282.652	265.572	285.58	275.348	279.282	278.194	275.996	288.339	1.02008	0.278863	0.533513	0.605311	1
276251	261.476	265.687	252.364	289.335	267.267	265.736	259.12	271.94	272.051	282.31	275.27	265.972	284.114	259.772	278.885	276.125	278.789	294.094	1.03757	0.11656	0.355158	0.875457	1
276751	245.274	268.489	263.98	256.412	243.334	257.204	248.814	257.048	275.427	250.226	278.313	275.349	265.974	253.89	254.919	274.74	279.357	271.406	1.03808	0.150143	0.408882	0.839059	1
277251	284.766	284.728	276.323	272.268	270.818	283.288	255.512	280.332	272.609	274.108	287.89	278.6	277.684	276.843	275.826	275.749	287.781	276.233	1.01212	0.424353	0.657747	0.851657	1
277751	281.876	264.066	242.433	258.771	275.977	261.671	267.008	272.328	250.801	259.227	253.165	249.015	254.642	264.111	253.472	248.035	258.679	257.825	0.967679	0.0732405	0.276299	1	1
278251	297.484	308.664	277.649	284.119	284.457	286.856	303.119	297.763	279.227	295.006	276.219	270.138	295.279	282.614	271.586	267.6	280.77	293.627	0.966977	0.0826645	0.293056	1	1
278751	265.043	320.487	295.046	268.348	278.464	286.94	286.849	260.236	278.242	277.293	277.687	264.168	282.75	275.277	273.735	256.742	272.231	272.099	0.965478	0.160548	0.421659	1	1
279251	280.525	333.719	311.827	301.333	311.066	300.215	311.322	320.477	303.609	307.857	280.767	293.698	290.585	303.642	319.095	278.358	305.347	297.045	0.964782	0.118224	0.355826	1	1
279751	277.433	293.738	288.152	297.183	294.775	296.791	305.878	310.134	292.752	291.698	292.277	301.645	299.294	296.253	278.621	284.268	303.674	281.272	0.989524	0.573563	0.767595	0.60145	1
280251	273.296	264.42	273.245	276.385	266.94	277.883	268.146	277.051	276.748	284.867	285.683	282.304	280.024	272.096	261.248	266.407	274.089	272.54	1.01025	0.573342	0.767595	0.164979	1
280751	288.272	285.149	289.17	316.49	297.052	280.522	285.059	280.756	294.38	295.625	303.43	298.226	279.697	297.138	287.083	278.131	287.269	285.209	0.998073	0.928747	0.960265	0.410055	1
281251	279.393	262.252	266.744	291.94	301.081	274.267	284.704	277.266	287.807	265.343	283.385	285.092	275.713	291.481	295.889	276.144	285.25	280.933	1.00545	0.825442	0.898534	0.342218	1
281751	276.394	260.712	268.976	263.232	288.722	270.816	277.355	278.818	281.075	274.572	275.743	273.729	261.755	272.421	281.914	268.545	285.036	270.868	0.999385	0.96474	0.984063	1	1
282251	265.674	268.513	264.643	274.243	269.007	264.16	269.531	291.427	265.646	278.089	266.946	266.607	261.863	274.378	277.559	268.814	287.796	268.768	1.00739	0.613168	0.78442	1	1
282751	255.102	256.63	258.947	269.292	268.022	261.563	272.234	267.115	249.822	273.848	256.594	247.213	247.487	250.349	245.938	273.458	273.479	264.752	0.989143	0.708801	0.845109	0.0853534	1
283251	276.609	288.39	298.053	280.957	290.324	283.51	300.405	288.517	270.289	269.498	265.003	269.67	268.937	269.337	254.909	281.204	276.043	289.162	0.948278	0.0535687	0.227348	0.520737	1
283751	279.31	280.309	281.702	275.189	279.166	269.123	280.948	294.076	278.177	281.104	266.579	274.763	278.307	263.444	282.048	262.798	267.898	296.505	0.982306	0.263088	0.516755	1	1
284251	303.296	299.788	288.883	282.504	291.286	289.823	291.786	292.723	293.361	304.902	275.767	278.128	280.517	290.454	275.788	271.694	278.056	277.642	0.961836	0.052489	0.225724	0.903708	1
284751	267.124	281.444	264.934	273.19	268.019	270.96	262.937	277.368	276.54	299.583	260.476	270.719	267.014	287.179	260.024	268.126	280.635	267.876	1.00783	0.666893	0.829746	1	1
285251	268.757	281.585	286.126	272.465	272.025	283.333	252.649	284.062	277.642	287.663	265.256	265.107	278.7	274.324	261.143	244.286	275.469	270.568	0.977355	0.264542	0.518182	1	1
285751	302.183	300.082	313.234	273.369	297.607	288.404	304.856	288.026	282.279	289.935	281.87	271.535	284.262	282.688	284.349	254.407	279.351	296.224	0.952673	0.0789532	0.287852	0.905093	1
286251	286.604	297.797	304.686	282.358	268.22	271.27	284.838	267.69	280.215	264.161	278.26	266.442	272.446	277.251	272.997	271.849	274.827	278.435	0.965794	0.247575	0.514638	0.0379108	1
286751	286.469	283.596	305.234	277.205	283.298	271.727	291.408	275.126	273.659	256.707	259.91	266.111	272.141	263.07	265.749	268.79	263.095	269.467	0.936146	0.0205203	0.133086	0.385972	1
287251	235.953	220.434	244.178	239.326	233.057	240.758	246.658	237.863	246.355	228.769	252.974	239.095	229.668	243.206	249.451	251.758	237.36	228.956	1.00777	0.668703	0.829746	1	1
287751	217.837	219.024	232.596	223.363	206.425	217.708	215.452	204.969	224.538	239.557	214.412	221.832	212.935	240.776	230.727	233.978	236.352	224.996	1.04774	0.034661	0.174037	1	1
288251	234.151	260.645	266.882	256.531	243.228	258.38	237.129	224.576	248.689	269.19	232.461	243.468	261.486	254.249	234.84	261.047	258.38	248.226	1.01486	0.566744	0.767595	1	1
288751	240.97	246.548	251.238	257.589	257.837	251.872	252.614	252.829	253.901	264.801	247.475	247.091	262.646	253.219	260.959	258.622	259.271	262.789	1.02272	0.185327	0.446519	0.363202	1
289251	287.345	272.602	275.461	287.133	268.928	278.902	258.483	265.57	269.051	267.678	271.063	259.833	270.342	287.05	288.552	265.251	259.816	280.303	0.994485	0.835046	0.906222	0.153388	1
289751	278.267	283.572	289.793	293.85	250.976	285.473	273.208	280.309	276.608	287.549	284.686	268.222	276.623	267.489	278.344	276.699	285.235	261.556	0.989788	0.583502	0.767595	1	1
290251	295.941	281.765	284.042	303.54	258.371	307.009	289.042	284.119	280.312	299.209	275.741	272.828	277.503	270.71	282.512	282.976	287.485	279.1	0.9783	0.28278	0.537659	1	1
290751	301.615	313.966	293.158	303.854	294.451	319.475	298.097	296.349	286.634	303.079	276.135	277.881	304.499	295.754	287.868	285.353	305.705	296.775	0.972466	0.123779	0.357305	1	1
291251	282.087	318.659	284.594	267.028	269.429	297.976	271.8	292.943	296.25	291.943	278.483	269.92	290.516	281.225	281.787	272.444	298.793	287.572	0.989118	0.630941	0.801891	1	1
291751	221.064	233.419	226.612	235.047	220.188	230.907	214.608	239.266	245.58	237.264	255.476	249.398	245.822	232.585	268.248	248.949	250.469	253.059	1.08447	0.000897684	0.0311505	1	1
292251	221.689	221.423	222.658	230.299	221.212	229.452	209.435	229.164	233.357	244.895	251.845	245.539	238.561	238.847	262.504	257.263	237.166	242.645	1.09936	2.4515e-05	0.00404984	1	1
292751	262.938	254.986	252.662	263.595	253.076	243.196	255.471	269.089	251.467	263.194	268.279	258.18	268.918	260.166	274.644	265.662	264.039	257.957	1.03233	0.0188161	0.127771	1	1
293251	257.11	259.526	248.393	274.784	260.875	239.46	244.921	273.162	259.717	259.479	283.996	268.064	260.57	265.224	274.787	262.558	258.26	257.608	1.03132	0.121317	0.355963	1	1
293751	246.375	228.832	225.746	239.94	240.871	227.724	244.88	231.017	240.209	241.853	263.035	247.458	243.618	233.039	256.686	255.855	246.651	262.833	1.05901	0.0049548	0.071048	1	1
294251	166.138	159.634	159.944	166.785	160.839	165.616	181.136	158.486	174.905	185.797	183.293	191.658	183.602	176.472	192.987	201.592	180.12	193.024	1.13061	2.06459e-05	0.00404984	1	1
295251	293.266	297.84	298.994	273.758	271.326	278.887	281.387	290.422	287.861	279.065	294.109	268.836	274.495	285.989	269.898	280.061	276.497	295.455	0.980831	0.459322	0.688018	0.123262	1
295751	295.1	280.9	309.821	301.446	271.576	279.302	288.082	295.469	284.166	287.983	286.931	287.345	262.979	292.296	281.021	274.811	304.629	280.153	0.98169	0.355147	0.604297	1	1
296251	278.004	264.31	275.21	261.144	266.459	263.538	290.075	286.405	272.822	264.604	270.674	272.189	275.417	284.999	266.312	282.418	279.085	276.671	1.00586	0.813475	0.891379	0.0519111	1
296751	262.868	254.736	261.287	247.361	252.023	267.224	264.363	262.443	273.423	267.765	272.853	278.405	259.551	267.885	247.839	272.96	269.679	267.601	1.02507	0.302634	0.556214	0.181425	1
297251	268.51	273.44	269.304	260.57	271.686	276.38	257.691	280.16	280.053	283.289	276.113	269.952	264.575	286.95	267.568	284.242	285.338	269.755	1.02051	0.174487	0.445911	1	1
297751	311.59	306.162	302.884	299.328	304.993	313.09	300.425	303.583	313.893	286.848	292.018	250.625	299.366	308.879	272.864	274.582	294.494	285.283	0.930699	0.00274374	0.0543413	1	1
298251	340.715	328.387	345.887	328.117	317.015	328.622	325.337	326.879	300.4	304.279	293.898	280.093	327.39	318.097	297.014	286.82	305.544	308.644	0.925347	0.0493896	0.217564	0.262472	1
298751	333.241	345.502	351.187	306.616	317.027	333.615	325.326	278.941	305.046	320.214	292.74	297.472	318.476	306.246	267.927	289.318	311.011	308.318	0.936206	0.157889	0.420056	0.360138	1
299251	352.272	376.907	383.326	336.671	354.95	340.728	335.492	304.393	315.154	325.578	291.256	292.419	335.388	321.871	286.152	280.251	329.037	318.096	0.896821	0.0836787	0.293906	0.171641	1
299751	367.937	379.196	368.956	342.647	344.373	348.255	339.28	353.181	331.522	317.535	313.184	299.712	352.657	330.195	318.85	281.47	324.994	313.662	0.898251	0.0497376	0.217564	0.0537703	1
300251	332.917	343.22	335.522	339.861	321.696	336.177	344.168	354.677	315.337	307.958	306.582	285.753	335.161	314.186	305.492	299.478	334.689	319.027	0.92881	0.00235702	0.0480158	1	1
300751	287.672	294.483	300.353	283.408	291.74	267.933	290.107	299.489	276.739	284.717	277.457	283.242	293.067	291.732	280.506	278.895	293.782	303.111	0.997911	0.906941	0.947191	0.825892	1
301251	267.07	257.218	253.494	262.026	263.002	247.2	268.611	266.261	264.149	266.187	267.985	261.046	252.221	265.127	276.157	273.008	272.342	270.374	1.02359	0.163716	0.42758	0.810515	1
301751	259.192	265.767	265.935	272.955	276.213	244.699	259.056	275.739	260.519	286.851	280.164	256.811	270.445	258.97	297.039	267.147	277.289	285.592	1.04211	0.0632547	0.251148	1	1
302251	243.796	266.699	269.345	275.225	260.518	268.035	247.368	263.967	261.117	277.221	265.521	273.724	283.183	268.293	271.783	271.907	286.272	273.379	1.0489	0.00630866	0.0749679	1	1
302751	227.806	222.859	243.674	235.092	241.24	245.315	222.342	257.002	231.518	240.039	251.404	251.175	243.827	246.692	257.91	243.731	247.741	246.873	1.04821	0.0157588	0.122245	1	1
303251	187.709	188.931	205.139	198.558	196.214	187.317	197.444	207.414	195.645	202.321	215.47	199.643	196.742	202.395	233.432	219.242	203.344	216.14	1.07048	0.00910467	0.0952381	1	1
303751	208.381	214.036	212.534	232.907	230.031	212.492	222.848	206.388	230.14	229.29	236.789	235.845	228.112	222.986	242.959	231.901	233.548	243.751	1.06875	0.0228137	0.142179	0.938762	1
304251	265.803	269.588	267.647	279.464	278.375	301.069	268.215	258.094	274.434	278.257	276.973	264.817	281.33	261.909	250.659	255.46	275.352	288.53	0.988061	0.663123	0.829727	0.541525	1
304751	246.012	262.6	257.029	254.251	250.959	269.583	265.649	243.6	251.444	262.871	242.099	233.553	273.61	249.283	239.866	241.419	279.428	262.415	0.992794	0.769208	0.874077	1	1
305251	265.934	274.138	250.125	258.579	267.4	269.045	262.585	280.524	263.568	280.637	270.206	252.243	301.932	250.258	266.674	256.805	286.712	286.221	1.025	0.328336	0.580002	1	1
305751	267.509	268.132	246.972	250.518	279.34	261.638	254.31	269.782	270.295	271.453	269.046	261.107	298.039	267.689	261.858	284.253	267.15	265.101	1.03259	0.127531	0.362268	1	1
306251	275.329	278.234	264.166	273.601	274.75	275.749	260.121	275.816	289.324	293.048	273.073	274.248	289.361	286.996	274.774	304.673	273.69	279.322	1.03328	0.0645617	0.254323	1	1
306751	276.866	296.935	280.135	291.664	286.448	285.431	287.544	285.09	291.991	302.66	289.466	275.762	276.409	287.601	290.014	283.463	295.722	295.46	1.0056	0.662803	0.829727	1	1
307251	296.605	302.297	300.492	283.324	299.713	302.984	308.29	280.362	297.366	294.73	300.931	288.309	282.094	311.356	299.471	269.367	316.901	298.031	0.996166	0.844622	0.910841	1	1
307751	312.072	332.583	338.391	297.459	295.25	320.133	305.025	307.922	293.608	307.788	297.468	294.815	302.981	327.81	312.769	263.074	316.836	306.355	0.974113	0.46518	0.693878	0.427984	1
308251	282.18	306.199	316.57	275.822	305.167	297.621	283.68	290.345	275.754	304.277	287.129	279.713	307.784	287.872	298.632	271.941	313.968	288.107	1.00231	0.920755	0.955602	1	1
308751	283.252	274.349	289.455	266.579	278.762	266.472	279.321	279.544	264.157	272.86	294.022	282.17	294.439	264.938	290.186	272.176	306.997	285.248	1.03269	0.105655	0.33186	1	1
309251	313.97	274.302	292.82	281.125	278.635	284.442	300.169	282.843	293.916	277.688	278.845	280.016	304.895	282.078	303.226	270.135	294.904	271.911	0.985196	0.579029	0.767595	0.533205	1
309751	293.022	277.529	281.532	278.887	294.81	281.069	270.773	287.197	280.178	281.478	253.331	257.307	268.063	264.123	305.581	264.333	275.982	267.986	0.95803	0.0568305	0.23533	1	1
310251	295.572	297.897	305.177	280.962	290.398	311.298	272.97	285.732	283.622	289.097	286.471	275.918	278.113	265.697	283.119	287.699	280.91	289.287	0.966719	0.204887	0.462294	0.253636	1
310751	299.277	290.885	329.931	300.832	324.817	318.125	293.18	308.052	280.238	307.97	289.982	275.346	274.048	281.051	267.615	294.805	294.781	301.579	0.94239	0.12651	0.362254	0.353934	1
311251	244.527	249.585	258.936	253.434	257.861	249.022	251.869	267.754	234.14	256.378	255.039	258.267	256.063	254.229	253.123	255.578	255.579	257.121	1.01511	0.252742	0.514873	1	1
311751	197.222	203.998	207.998	213.196	195.503	204.232	218.513	215.77	199.684	218.172	232.593	237.23	220.195	218.396	238.579	227.375	201.791	217.378	1.08383	0.0237736	0.142676	0.93806	1
312251	239.459	227.459	268.611	253.602	237.93	257.64	246.789	243.657	246.77	242.434	270.505	248.866	258.792	262.477	242.781	272.36	248.321	250.217	1.03368	0.150248	0.408882	1	1
312751	244.861	244.734	268.134	241.277	247.103	257.28	249.183	261.211	252.034	246.469	270.55	239.972	261.885	251.853	261.038	275.696	257.39	258.711	1.02549	0.194245	0.454923	1	1
313251	235.254	224.8	248.271	231.083	262.689	231.656	233.058	238.852	247.624	231.624	247.744	231.639	259.826	232.622	258.317	249.215	243.63	243.453	1.0208	0.361545	0.605121	1	1
313751	240.046	234.608	233.574	253.082	255.297	236.132	246.955	251.993	249.973	247.903	242.53	243.461	256.03	244.926	249.095	249.768	244.128	263.946	1.01823	0.414201	0.646269	0.259458	1
314251	249.81	259.219	264.176	248.665	252.702	250.591	262.737	273.96	243.71	270.483	260.452	258.572	278.745	268.975	255.532	269.193	267.95	275.499	1.0433	0.0154033	0.122245	1	1
314751	232.034	241.617	235.329	248.064	243.995	219.253	248.119	268.991	226.554	242.934	223.579	221.23	255.791	239.797	229.958	267.534	238.986	245.443	1.0006	0.985097	0.99531	0.878628	1
315251	216.054	235.073	224.139	241.975	223.574	215.667	242.512	255.498	221.965	241.087	218.513	204.148	238.555	235.079	239.965	255.407	234.477	219.305	1.00485	0.881877	0.935682	0.916462	1
315751	230.154	249.618	221.714	225.773	224.456	230.652	239.099	240.67	226.972	238.465	231.736	218.168	238.528	256.126	250.694	255.039	241.846	248.41	1.04303	0.218674	0.47251	0.227582	1
316251	266.829	254.819	269.541	270.201	269.388	255.626	259.588	260.362	267.946	260.688	241.747	247.216	265.019	273.043	253.053	252.909	252.227	254.218	0.968757	0.123359	0.357305	0.676176	1
316751	244.309	231.388	245.511	226.668	233.243	215.074	227.032	242.795	245.97	238.863	241.382	246.007	236.454	233.207	258.326	242.772	234.614	233.98	1.02539	0.313499	0.565149	0.591688	1
317251	263.108	261.257	248.139	247.923	258.038	253.236	244.726	249.586	245.253	246.032	256.404	261.852	235.013	251.913	279.663	250.486	264.165	271.717	1.02024	0.329428	0.580002	1	1
317751	250.872	252.611	250.882	253.318	249.799	252.575	237.801	242.414	239.676	242.949	244.095	263.136	247.382	239.355	282.846	257.882	252.025	260.223	1.02688	0.19481	0.454923	1	1
318251	237.778	258.795	248.931	252.117	257.347	252.362	231.362	241.082	253.058	257.437	257.292	276.851	252.729	256.737	282.95	257.945	274.095	258.857	1.06362	0.00456833	0.071048	1	1
318751	277.08	278.241	271.063	277.889	261.589	275.081	278.856	283.84	278.8	286.205	260.746	273.555	272.766	269.842	289.591	288.207	285.112	290.335	1.01366	0.494503	0.714424	0.459819	1
319251	287.986	280.352	266.212	281.211	270.485	293.034	271.777	289.041	262.207	273.318	251.269	273.287	269.571	279.847	287.28	291.74	275.809	283.729	0.993424	0.764827	0.872915	0.827804	1
319751	255.433	265.63	253.494	252.13	268.149	271.543	255.919	272.395	257.436	266.436	257.35	277.862	266.367	273.642	294.306	248.636	277.541	256.854	1.02843	0.182001	0.446519	1	1
320251	312.966	305.35	308.597	295.565	311.027	309.438	313.742	318.771	310.264	326.249	294.794	309.002	314.579	322.102	324.146	267.194	304.837	308.718	0.994939	0.857686	0.917582	0.370587	1
320751	313.136	304.859	299.261	298.3	305.653	295.441	298.208	309.87	309.051	304.959	301.341	294.763	312.198	317.358	299.853	283.221	313.262	322.857	1.00586	0.702982	0.842212	1	1
321251	296.47	294.025	284.607	273.266	281.632	271.582	267.203	302.481	295.128	281.056	305.458	286.884	281.701	286.788	289.489	280.127	292.695	290.913	1.01119	0.569406	0.767595	0.886234	1
321751	268.356	287.434	276.066	265.394	271.355	265.552	259.769	272.799	286.466	271.049	286.357	272.047	259.113	262.26	259.086	274.782	268.103	276.197	0.990137	0.663316	0.829727	0.266553	1
322251	288.243	294.179	265.363	273.223	274.797	258.368	269.9	275.036	271.391	280.029	266.251	260.656	266.781	282.044	259.846	269.996	277.374	288.431	0.992272	0.704009	0.842212	0.864373	1
322751	282.822	290.377	275.231	281	289.147	263.355	292.333	297.292	275.817	292.946	253.426	274.808	287.786	279.139	265.018	264.298	294.655	303.679	0.987588	0.599261	0.779168	1	1
323251	261.813	279.022	261.125	265.892	256	274.468	280.308	267.951	272.43	268.834	246.134	278.332	272.549	272.453	269.999	266.931	275.571	265.519	0.998889	0.943891	0.966978	1	1
323751	257.021	286.756	282.757	268.645	270.93	275.166	255.977	262.082	266.987	278.826	291.291	300.286	286.329	286.337	290.265	265.265	271.71	267.367	1.04589	0.200767	0.457339	0.0614387	1
324251	287.649	309.426	281.258	304.733	296.214	291.579	282.662	295.326	294.502	292.09	321.72	321.788	303.933	292.299	298.861	285.135	285.452	303.86	1.02338	0.337525	0.589842	0.657404	1
324751	284.737	282.276	281.126	309.486	257.522	279.425	292.79	300.42	284.94	293.949	316.59	311.306	304.088	287.15	281.984	292.994	287.91	289.017	1.03586	0.193379	0.454923	0.875474	1
325251	338.611	292.231	317.676	328.547	279.077	304.859	319.62	313.307	285.202	305.04	302.922	309.404	309.861	304.512	292.29	289.355	282.484	301.931	0.970735	0.240002	0.504784	1	1
325751	352.669	333.325	354.452	328.466	312.83	329.356	338.512	330.81	317.432	333.086	311.357	315.971	317.273	330.609	319.104	300.342	325.164	326.043	0.960337	0.139983	0.390116	0.408866	1
326251	304.499	291.046	328.409	293.904	305.355	305.398	331.767	290.161	300.893	319.31	295.831	287.378	293.354	309.867	302.609	309.257	308.231	304.275	0.992251	0.69776	0.841117	1	1
326751	279.444	266.535	288.287	291.421	296.925	278.271	288.376	297.586	299.159	304.202	275.68	271.739	301.869	296.165	307.511	288.858	293.6	282.436	1.01394	0.613894	0.78442	0.271154	1
327251	255.256	239.756	243.427	236.453	257.905	244.603	231.926	245.557	225.976	242.147	214.996	238.175	252.738	256.295	253.711	248.588	246.288	245.703	1.00815	0.809815	0.891047	0.128589	1
327751	270.656	275.969	261.761	265.237	277.296	266.923	259.754	261.374	253.246	271.3	230.116	248.624	270.454	279.644	271.529	256.058	261.97	268.396	0.985735	0.655796	0.828663	0.177787	1
328251	285.664	292.609	275.565	288.737	285.802	283.372	295.348	289.903	294.847	277.524	262.311	269.12	279.174	283.692	290.02	268.387	279.606	302.866	0.969463	0.184653	0.446519	0.511768	1
328751	253.264	259.129	265.157	262.918	251.198	235.347	248.922	250.804	272.432	249.133	247.155	262.553	259.663	257.302	273.274	259.636	262.864	282.225	1.02376	0.319772	0.571423	0.890972	1
329251	257.854	275.685	275.965	273.853	264.45	265.618	263.531	265.447	280.651	262.089	252.411	278.419	279.755	263.76	287.776	262.01	279.044	263.37	1.0023	0.894798	0.943773	1	1
329751	331.477	335.102	322.594	297.229	313.508	329.87	318.066	301.128	298.618	310.973	283.53	287.54	309.985	285.236	281.796	275.72	294.4	292.04	0.920504	0.0260606	0.151067	0.629556	1
330251	300.739	290.805	276.533	270.918	281.307	269.665	273.758	286.41	274.16	265.69	257.75	259.92	274.77	257.635	271.637	251.013	268.457	279.957	0.945543	0.0390264	0.184277	0.784106	1
330751	241.313	258.618	253.051	243.251	250.159	239.995	248.52	253.678	243.952	241.464	227.659	234.521	250.371	250.666	241.678	229.247	253.253	246.741	0.974497	0.2127	0.469881	0.684497	1
331251	250.583	253.5	247.513	247.39	259.285	255.374	248.514	264.131	251.84	249.765	230.803	235.681	257.556	259.812	243.306	244.681	247.097	258.367	0.977586	0.290134	0.54582	0.496769	1
331751	253.948	260.001	259.136	247.872	259.448	268.928	251.415	275.773	242.603	255.527	256.015	251.441	269.647	257.213	247.798	247.648	262.087	260.348	0.995084	0.764256	0.872915	1	1
332251	217.603	236.155	225.976	228.102	228.388	224.961	217.018	238.351	231.712	234.486	220.795	241.279	242.569	236.787	239.974	232.312	250.598	250.107	1.04913	0.0114992	0.109319	1	1
332751	205.79	216.672	210.274	212.017	218.165	193.094	199.548	209.083	215.64	212.487	184.853	209.589	228.861	218.49	201.258	222.863	223.949	220.215	1.02249	0.478034	0.705403	0.670008	1
333251	226.51	239.392	221.934	239.583	229.68	217.591	227.847	222.344	246.17	251.504	220.11	226.628	234.747	239.184	227.386	239.573	236.481	221.861	1.01276	0.53417	0.749317	1	1
333751	265.158	274.86	266.953	272.939	249.41	252.434	274.116	256.976	277.545	296.026	252.594	262.337	268.456	254.141	277.788	274.098	286.439	265.735	1.01976	0.388179	0.631146	1	1
334251	294.719	317.707	293.186	274.849	282.207	269.863	278.498	289.448	286.856	296.526	271.682	255.988	276.85	276.127	284.82	269.374	287.031	293.548	0.970863	0.357864	0.604297	0.35422	1
334751	295.989	316.966	296.693	286.708	265.161	296.899	273.691	287.133	284.983	298.771	269.416	264.761	286.861	293.172	288.946	276.689	277.136	283.751	0.975148	0.413897	0.646269	0.355754	1
335251	267.451	297.553	291.599	280.724	247.325	269.039	252.163	264.744	264.823	272.626	259.064	284.22	273.347	276.233	269.265	271.083	259.063	268.804	0.999295	0.98187	0.99531	0.343027	1
335751	258.307	277.693	265.769	269.874	276.375	265.892	268.434	271.891	283.827	253.007	266.793	280.42	262.477	270.208	283.71	262.75	276.949	256.731	0.989739	0.531284	0.748628	1	1
336251	268.712	276.52	276.117	278.257	279.307	260.307	271.247	269.311	299.077	270.911	271.788	272.092	272.473	277.305	282.248	278.742	258.427	261.074	0.986367	0.406266	0.641504	1	1
336751	262.621	268.549	270.776	279.745	269.046	250.817	283.197	268.293	272.111	269.094	266.621	251.326	271.92	273.283	278.516	267.805	265.627	266.169	0.9939	0.727606	0.8453	0.732633	1
337251	259.086	270.915	261.051	260.738	256.873	255.87	271.09	265.775	254.624	262.589	272.985	265.365	275.656	270.618	276.573	280.669	285.968	248.859	1.03534	0.0427821	0.196798	1	1
337751	265.585	274.696	240.203	243.086	262.554	245.198	249.041	252.527	281.607	275.641	264.355	292.278	268.293	271.874	270.619	269.998	284.268	254.402	1.05929	0.0237671	0.142676	1	1
338251	230.943	239.673	230.773	232.874	222.365	203.369	229.709	228.299	247.334	238.453	239.764	268.358	245.027	251.257	264.227	255.499	253.139	252.075	1.09803	0.000568806	0.0270372	1	1
338751	201.716	208.885	213.863	229.812	202.033	209.279	226.71	225.719	231.524	243.967	242.234	248.34	248.482	240.037	250.707	248.859	236.871	239.069	1.12774	0.0103723	0.100842	0.153721	1
339251	190.977	189.262	214.8	214.173	203.169	202.921	210.628	202.425	215.315	248.529	228.987	236.795	246.309	229.459	251.663	255.826	230.178	233.727	1.17238	1.58736e-06	0.00113367	1	1
339751	214.649	212.473	221.937	215.764	217.625	218.739	226.733	214.765	237.151	242.323	248.553	242.189	237.277	233.264	260.386	253.038	243.232	230.85	1.10671	2.83974e-05	0.00404984	1	1
340251	262.024	277.249	274.571	264.46	268.804	257.526	266.376	258.891	258.555	279.137	278.633	274.255	267.304	274.598	259.531	270.762	285.985	259.54	1.02566	0.181923	0.446519	0.711643	1
340751	251.831	282.046	263.466	267.585	259.557	262.48	260.342	268.457	259.179	277.006	279.125	283.425	272.942	269.511	283.945	271.27	262.278	259.336	1.03533	0.120073	0.355826	0.557502	1
341251	204.616	243.785	209.966	228.037	218.525	232.251	211.146	229.77	234.077	233.163	235.832	246.315	223.744	230.959	236.678	233.797	234.236	221.351	1.0417	0.0809646	0.291554	1	1
341751	230.331	255.367	260.212	243.146	259.633	258.386	256.906	256.431	258.962	248.256	263.826	252.513	253.164	241.126	228.931	239.189	256.022	244.962	0.977457	0.251957	0.514873	1	1
342251	261.434	268.339	252.963	242.137	263.893	262.035	274.192	250.781	271.314	250.055	272.089	260.771	268.846	240.67	232.768	240.819	266.599	254.807	0.97458	0.271438	0.527344	1	1
342751	287.855	276.597	256.724	266.346	260.751	271.48	259.853	263.558	282.487	253.908	274.958	254.032	270.39	243.086	243.592	243.167	270.605	249.452	0.949514	0.0271433	0.154172	1	1
343251	260.831	252.772	253.101	265.892	266.497	252.473	240.431	255.82	256.201	232.373	246.776	232.499	249.676	243.466	232.119	223.616	247.765	247.398	0.935621	0.00100485	0.0311505	1	1
343751	237.981	243.271	246.712	247.58	252.295	245.787	241.345	258.301	257.288	238.56	261.359	232.384	255.591	248.524	229.385	244.147	244.644	237.476	0.982744	0.321824	0.572222	1	1
344251	242.83	233.967	255.608	248.326	251.416	249.867	242.157	268.02	260.44	246.658	247.781	252.694	243.594	246.903	229.185	224.013	243.66	228.992	0.960424	0.179719	0.446519	0.369742	1
345751	250.692	236.556	261.649	235.282	263.612	235.086	237.993	235.835	244.057	247.735	249.323	243.705	241.239	236.525	232.043	238.697	245.034	237.204	0.986706	0.457008	0.685994	1	1
346251	239.228	230.683	243.799	240.579	255.132	229.2	259.292	248.221	240.488	239.345	249.037	247.985	227.03	234.719	241.475	236.596	239.118	245.031	0.987979	0.563009	0.76608	0.642686	1
346751	210.941	223.01	204.635	212.645	204.402	209.817	222.13	218	229.184	215.942	237.353	231.38	210.239	215.951	202.361	222.928	212.345	221.545	1.01823	0.597936	0.779168	0.0792134	1
347251	212.349	212.673	202.639	219.483	217.522	211.413	214.021	225.195	206.158	216.199	235.637	234.538	217.502	224.384	216.663	230.306	211.317	226.186	1.04751	0.0140568	0.120457	1	1
347751	242.468	229.283	236.547	240.941	243.481	242.276	242.628	249.878	226.602	223.539	250.621	248.003	236.99	225.716	230.635	237.072	233.539	233.554	0.984014	0.340269	0.591615	1	1
348251	231.864	234.271	249.874	238.791	234.927	234.163	246.597	246.331	218.17	241.443	243.022	254.453	230.409	219.309	241.227	239.744	227.143	235.845	0.998879	0.959121	0.981138	0.9019	1
348751	207.348	201.125	209.28	221.569	202.508	200.282	220.876	219.358	200.424	225.955	229.505	244.916	222.538	222.487	226.013	232.049	220.796	216.953	1.08415	0.000530087	0.0270372	1	1
349251	182.342	168.777	172.067	203.249	170.638	167.404	177.735	190.302	184.987	203.264	210.813	209.375	189.859	205.781	207.778	209.051	182.385	192.249	1.11935	0.000832888	0.0311505	1	1
349751	199.163	185.497	196.358	202.908	195.302	196.046	200.715	212.955	206.183	213.918	230.317	207.781	192.58	206.155	227.281	211.447	203.429	205.178	1.05735	0.0846121	0.295239	0.822571	1
350251	206.328	224.61	202.311	231.965	216.233	206.146	232.639	233.012	225.352	230.601	248.154	223.087	222.136	230.782	220.799	222.744	221.206	219.392	1.03048	0.380644	0.626787	0.260481	1
350751	224.041	217.517	220.334	220.409	221.061	215.12	232.424	228.391	234.701	230.993	239.563	245.267	235.584	227.279	227.071	227.81	229.018	226.956	1.03751	0.182893	0.446519	0.00971931	1
351251	221.494	220.975	210.237	217.481	213.596	205.626	238.95	214.694	239.383	233.852	245.05	251.914	225.694	226.617	229.468	230.061	244.284	202.16	1.0538	0.213837	0.469881	0.333121	1
351751	232.842	220.851	226.429	226.866	210.57	226.266	226.832	234.856	240.707	240.802	252.2	258.871	226.492	227.145	212.035	238.481	235.734	223.497	1.03374	0.450402	0.678937	0.0177224	1
352251	219.877	220.324	223.571	224.702	210	232.753	227.131	231.762	225.762	230.349	253.998	252.396	238.316	224.429	207.063	249.441	221.127	220.814	1.0407	0.257855	0.514988	0.582914	1
352751	222.504	211.407	215.964	222.21	206.411	209.222	220.657	243.296	226.294	232.57	255.817	234.789	250.011	223.108	231.833	247.722	220.928	225.23	1.07282	0.0559776	0.234777	0.809557	1
353251	238.644	219.853	218.264	241.631	229.019	218.504	240.527	241.404	229.443	252.214	233.029	237.211	241.409	233.433	228.327	250.805	237.21	238.384	1.03598	0.0708882	0.26997	1	1
353751	236.887	229.377	246.833	250.599	244.838	248.544	248.049	247.945	242.6	241.751	245.264	255.772	237.763	232.417	231.019	249.939	240.445	240.81	0.990667	0.684628	0.838027	0.072277	1
354251	206.752	222.371	236.171	228.873	245.514	228.442	248.561	254.828	238.196	229.526	240.721	258.269	230.228	221.962	225.939	236.256	243.449	233.85	1.00497	0.901794	0.945276	0.109505	1
354751	203.721	212.55	209.516	196.824	224.182	214.6	216.392	224.97	218.831	219.064	219.896	241.319	223.832	210.22	220.456	238.281	216.43	226.041	1.04889	0.0352418	0.175716	1	1
355251	220.166	224.59	211.137	233.705	218.911	222.812	217.125	224.356	206.354	223.042	227.26	234.401	233.973	215.959	218.876	229.297	224.945	231.421	1.03033	0.0692695	0.267298	1	1
355751	235.2	250.353	240.373	263.671	249.457	252.975	242.881	240.918	233.795	247.876	252.144	244.604	244.232	256.654	230.829	249.523	261.138	254.652	1.0145	0.58277	0.767595	0.188375	1
356251	251.744	245.081	256.498	253.023	257.61	258.599	244.703	265.32	261.991	253.214	239.317	245.351	248.893	252.232	224.452	234.079	254.237	245.553	0.957621	0.016972	0.123134	1	1
356751	262.419	228.208	249.452	228.219	240.393	238.576	261.855	241.644	259.07	242.76	243.286	248.3	229.808	240.998	236.064	227.51	240.99	232.986	0.96962	0.304826	0.557285	0.378384	1
357251	212.878	226.283	226.534	234.5	213.941	224.727	237.868	230.547	238.219	233.621	231.713	243.945	223.526	216.824	207.842	214.543	232.637	226.795	0.993131	0.839846	0.908665	0.0780984	1
357751	204.205	215.637	222.749	228.93	219.802	216.415	222.194	217.1	217.424	231.502	231.562	239.579	221.51	214.69	224.121	233.428	227.213	230.794	1.04579	0.1035	0.327981	0.127649	1
358251	213.914	223.517	235.481	225.032	241.305	232.146	215.269	220.713	226.815	240.584	242.033	237.912	224.466	219.32	229.687	221.37	229.996	239.105	1.02472	0.389451	0.631146	0.180588	1
358751	242.112	245.709	235.146	251.102	255.705	241.955	246.873	233.459	236.835	241.931	221.726	220.205	244.377	219.899	190.386	228.457	220.184	228.982	0.921079	0.00431577	0.071048	1	1
359251	194.759	208.294	206.042	205.573	216.31	206.546	197.023	204.466	206.761	214.801	200.255	198.825	220.268	200.817	184.842	198.122	182.959	207.849	0.979935	0.384216	0.629761	1	1
359751	166.597	172.034	156.416	177.036	177.463	166.674	164.854	177.43	174.85	187.432	190.429	181.611	175.245	174.874	187.013	183.183	168.045	198.399	1.07361	0.00548056	0.071048	1	1
360251	155.633	161.484	146.092	156.833	158.598	140.269	149.823	169.688	164.771	161.113	176.135	178.86	170.828	160.034	165.874	190.044	167.863	163.383	1.09332	0.00505787	0.071048	1	1
360751	171.69	189.169	171.648	198.461	206.543	176.819	198.806	188.001	194.071	196.382	185.757	194.47	200.354	185.284	176.602	208.329	196.904	194.232	1.02543	0.503345	0.722102	0.404756	1
361251	217.356	214.778	210.795	209.88	226.834	222.932	223.366	193.258	223.226	218.103	219.364	214.131	218.472	205.002	167.902	222.899	223.319	224.874	0.9854	0.722121	0.8453	0.500496	1
361751	234.071	228.041	237.369	230.837	235.225	249.121	253.077	238.41	232.278	223.392	233.532	233.508	224.941	230.406	196.445	228.236	216.805	229.216	0.942973	0.011766	0.110198	1	1
362251	239.023	234.05	239.946	233.675	242.859	242.604	257.08	241.338	239.093	228.403	233.178	250.089	244.304	236.428	236.125	236.385	238.262	222.939	0.979926	0.186216	0.447044	1	1
362751	196.491	180.777	185.801	189.953	191.801	181.328	195.518	193.611	201.199	200.821	208.214	214.388	200.514	187.52	210.464	205.625	208.407	196.813	1.06775	0.0287052	0.156235	0.793099	1
363251	171.28	162.376	163.577	174.176	163.382	169.4	170.897	176.264	182.724	187.602	207.027	196.798	178.316	180.548	193.934	204.177	191.225	179.004	1.1203	0.0141379	0.120457	0.554877	1
363751	182.49	201.653	186.464	207.597	203.573	196.019	196.88	209.62	215.913	214.379	216.622	208.817	209.45	208.086	230.39	219.664	204.346	205.311	1.06491	0.0750607	0.280201	0.514172	1
364251	237.246	238.744	236.188	246.971	239.735	223.068	247.764	239.018	238.563	243.443	236.06	237.5	226.8	238.693	220.008	247.619	226.917	256.127	0.99342	0.757148	0.867921	0.827827	1
364751	245.89	236.596	238.942	238.761	253.802	232.525	252.917	220.994	247.678	243.404	235.084	246.988	237.41	225.693	221.375	253.878	228.616	248.074	0.987278	0.555298	0.761399	1	1
365251	225.968	237.361	214.188	236.41	239.609	222.686	251.476	233.546	249.585	233.142	233.069	251.295	229.384	215.512	232.243	248.575	234.893	254.468	1.0103	0.781373	0.880174	0.152337	1
365751	181.396	211.959	173.904	205.246	200.618	179.949	213.689	214.315	205.338	210.909	215.052	235.514	218.016	200.232	216.167	227.715	197.669	221.69	1.08763	0.0693551	0.267298	0.832836	1
366251	222.495	221.743	206.134	221.309	230.011	211.696	226.843	231.45	217.624	224.225	228.407	218.714	232.709	225.665	221.956	235.9	224.491	231.64	1.02735	0.0870268	0.298318	1	1
366751	278.697	287.297	280.809	278.712	274.906	286.477	280.613	260.461	265.299	268.576	247.694	254.486	264.956	269.135	234.86	250.923	263.599	266.831	0.93093	0.00129944	0.0343148	1	1
367251	254.268	239.466	243.698	247.669	234.252	236.929	248.014	255.672	237.24	246.604	223.955	226.565	239.102	233.047	210.56	231.285	229.701	234.64	0.944589	0.00572127	0.0718279	1

## Sheet: Table_S4b
Table S4b. Sequence coverage analysis across the A. thaliana mitogenome in MA lines from Jiang et al. (2014) based on residuals from a model that accounts for local nucleotide composition in 500-bp windows
Window Position	Control 1a	Control 1b	Control 1c	Control 2a	Control 2b	Control 2c	Control 3a	Control 3b	Control 3c	Saline 1a	Saline 1b	Saline 1c	Saline 2a	Saline 2b	Saline 2c	Saline 3a	Saline 3b	Saline 3c	Trt P-value	Trt FDR Correction	Line P-value	Line FDR Correction
751	-34.1065	-27.8806	-35.1487	-25.5147	-47.7523	-30.7169	-35.3219	-30.9164	-48.042	-26.0771	-29.4176	-19.6613	-26.8614	-31.3519	-24.5344	-4.47434	-39.914	-35.8976	0.0646339	0.34391	1	1
1251	-36.008	-56.5951	-60.2748	-44.6799	-44.2291	-43.3704	-45.7716	-33.4043	-39.8277	-30.0029	-28.2168	-32.2366	-41.9967	-31.3075	-20.0757	-26.3627	-44.8106	-48.8727	0.0702406	0.35022	0.848957	1
1751	2.11515	-3.21304	-7.37075	4.94106	-6.41786	-3.98332	-9.27765	7.23131	-6.34373	-2.70284	0.280393	-6.35341	-4.35173	13.2579	-7.06844	-10.8373	-11.1118	-6.36076	0.653395	0.857957	1	1
2251	-6.8984	-22.639	-9.51698	-15.3435	-21.4044	8.68691	-23.8497	-5.35672	-22.8504	-17.0836	-9.82644	-7.4397	-22.1891	-5.07767	-2.64912	-10.84	-24.7578	-20.0518	0.985625	0.998148	1	1
2751	-20.3494	-54.2513	-31.5322	-56.0673	-32.5662	-33.8882	-43.6679	-31.7185	-42.6697	-43.6189	-28.0164	-26.421	-37.2582	-44.0943	-32.3674	-25.4408	-50.569	-34.0823	0.578106	0.824379	1	1
3251	2.91877	-3.08427	-4.83617	-22.7173	-10.0029	-21.7561	12.227	-17.6148	-31.2108	-17.8019	-23.1552	-15.4478	-14.8382	-9.44693	-31.6051	-16.4214	-21.9421	-16.0643	0.142023	0.472502	1	1
3751	-45.0149	-27.3842	-46.2519	-47.9589	-42.2824	-40.7034	-27.3472	-57.3349	-46.9679	-33.621	-56.4087	-28.4927	-49.6443	-37.7696	-45.8502	-34.9464	-41.0073	-39.1535	0.717296	0.884468	1	1
4251	-26.8515	-28.3991	-47.4626	-19.9129	-18.0407	-22.2074	-24.3132	-33.8862	-32.0184	-36.6546	-48.06	-44.079	-50.7073	-32.3951	-32.9662	-45.0337	-32.3503	-28.2911	0.085411	0.376429	0.544428	1
4751	-69.4493	-74.7341	-84.6931	-56.5284	-50.9486	-70.1671	-57.8023	-65.8473	-63.5216	-67.3857	-79.2383	-71.4808	-72.8807	-68.5038	-60.6036	-52.2767	-73.4155	-66.1716	0.745311	0.895575	0.229001	1
5251	-62.2432	-54.4068	-55.7732	-43.885	-47.8494	-55.7154	-61.397	-37.2103	-54.7247	-53.9008	-68.4565	-63.1471	-47.8602	-57.2262	-40.6191	-33.6905	-50.5241	-47.2082	0.853121	0.960941	0.275294	1
5751	-77.503	-86.1979	-71.6401	-75.293	-72.4086	-76.5539	-73.8112	-77.8912	-79.452	-75.2861	-77.8584	-73.4479	-59.7578	-73.5871	-76.0303	-61.8609	-76.6863	-72.0251	0.0792656	0.37428	1	1
6251	-78.1683	-55.8448	-59.4641	-59.7115	-53.8036	-53.8367	-58.9422	-61.2722	-59.6152	-61.1234	-78.0107	-69.6867	-54.0572	-61.3605	-57.5342	-61.1662	-76.0802	-58.5267	0.394966	0.723936	0.600685	1
6751	2.10966	13.0092	3.41268	-8.85858	7.62845	13.3016	2.96461	-7.82193	3.18428	-23.1318	-47.9018	-35.2258	-22.5663	-23.2169	-25.6925	-34.3288	-26.7976	-10.5703	2.44856e-06	0.00174685	1	1
7251	-52.402	-49.4664	-59.3858	-60.8643	-65.5182	-46.4496	-73.3644	-67.9083	-53.0485	-70.2566	-71.3274	-56.5823	-67.9612	-68.5659	-62.3443	-51.2709	-65.8876	-65.22	0.149974	0.479514	1	1
7751	-42.9635	-28.3576	-46.7771	-32.7026	-20.5778	-40.9811	-39.9035	-25.5751	-28.7628	-46.2289	-35.0388	-25.4936	-37.968	-34.8381	-35.6143	-39.4177	-36.0036	-29.2891	0.684253	0.869648	1	1
8251	-66.4145	-70.5219	-75.8144	-70.654	-57.7738	-75.4173	-68.2391	-79.8774	-59.0431	-79.3162	-65.09	-52.4966	-65.8052	-64.1074	-55.4359	-57.4518	-68.4352	-57.5866	0.0995553	0.412691	1	1
8751	-105.212	-112.261	-100.247	-97.0141	-93.0203	-79.5873	-94.0564	-106.98	-88.1564	-82.6085	-96.0879	-75.0503	-103.361	-98.0688	-94.0824	-81.6638	-86.2495	-86.2883	0.283214	0.636779	0.117314	1
9251	-68.5345	-65.5329	-60.3099	-53.5985	-58.9231	-55.5861	-54.3861	-59.7332	-56.9013	-50.4854	-67.2446	-64.7466	-53.1955	-66.4335	-89.9396	-59.0912	-55.3812	-57.8651	0.499524	0.786129	0.783107	1
9751	-41.1859	-36.0862	-36.749	-32.1143	-31.5444	-28.4202	-28.2989	-32.3627	-40.6863	-36.6514	-40.4037	-44.7273	-28.1153	-30.9107	-62.1763	-49.7141	-40.438	-37.5969	0.080266	0.374324	1	1
10751	-41.053	-58.291	-39.4002	-42.99	-41.1408	-40.7059	-48.4448	-52.1517	-45.2081	-65.7633	-56.9933	-44.763	-61.8404	-45.9392	-47.6868	-43.1396	-56.1259	-52.5999	0.0480612	0.296191	1	1
11251	-35.6636	-49.5138	-37.0268	-32.5096	-42.0928	-44.2301	-39.0645	-42.5986	-36.1851	-44.3902	-47.0847	-42.8166	-40.0069	-40.2704	-38.1261	-45.1725	-43.2036	-31.8783	0.508228	0.793123	1	1
11751	-14.6973	-19.0162	-19.1786	-23.5044	-22.3399	-23.4997	-13.9131	-17.6449	-14.6592	-23.9403	-26.7059	-33.8824	-21.6849	-22.9831	-41.3785	-40.3618	-27.5602	-12.9044	0.013496	0.167471	1	1
12251	-23.0666	-31.2346	-22.1651	-51.8127	-39.1772	-35.7435	-17.3931	-28.3595	-22.9394	-21.4585	-34.6533	-30.3699	-22.299	-38.691	-50.2937	-29.9057	-42.2822	-22.1437	0.748521	0.895575	0.245279	1
12751	-20.9311	-24.9927	-21.191	-39.0791	-46.7733	-36.1658	-27.8136	-18.3077	-33.8418	-30.04	-21.8025	-20.4219	-18.9502	-31.491	-24.2588	-33.2801	-29.7836	-16.8214	0.447356	0.756974	0.0950254	1
13251	-22.0116	-10.3638	-7.67879	-2.23258	-16.3308	-24.1201	-10.6865	-1.01464	-25.0411	-32.2612	-16.5897	-26.4846	-22.7779	-23.1114	-11.4331	-35.9555	-11.9916	-25.1473	0.0337345	0.250549	1	1
13751	-36.4096	-32.2395	-20.8726	-32.9627	-32.612	-35.3659	-25.6643	-28.6379	-42.4358	-30.1069	-43.0648	-34.9232	-25.5368	-21.9598	-32.0778	-33.4976	-33.2944	-36.8939	0.890806	0.971013	0.803513	1
14251	-41.4153	-37.1462	-28.6266	-42.6744	-26.8329	-40.5587	-33.1491	-33.5929	-32.2992	-36.9083	-38.5729	-23.7774	-38.4489	-39.0701	-35.6215	-22.6198	-36.3182	-31.7544	0.611188	0.84617	1	1
14751	-22.1128	-24.8293	-8.43095	-40.7298	-12.2557	-18.1175	-9.14183	-11.2404	-29.755	-24.3352	-12.2226	-20.2917	-30.0879	-21.6588	-20.9307	-19.2002	-26.5089	-20.3372	0.604456	0.8434	1	1
15251	-40.0909	-42.6765	-17.7912	-47.9252	-22.0203	-24.4794	-26.8191	-25.9215	-30.3566	-30.3248	-9.93163	-11.7556	-20.9974	-21.6474	-16.4086	-20.011	-21.5112	-36.8453	0.0410905	0.279024	1	1
15751	4.64667	-18.7348	5.84833	-3.43604	7.42365	0.555084	13.8138	3.77859	1.95193	-2.09522	5.31082	-5.33367	-2.62188	-1.72235	-13.7195	-7.06279	14.3098	2.12472	0.471304	0.774286	1	1
16251	1.92531	-0.921605	-3.04324	4.40485	-15.5763	3.52575	2.23218	-7.74134	5.8192	-16.5399	-11.0563	-10.7245	-17.441	-3.53914	-4.47188	-19.6003	6.5551	-3.35612	0.0456907	0.293491	1	1
16751	-14.7192	-21.7288	-18.7101	-14.5266	-20.8243	-23.1876	-4.4753	-34.8175	-12.2122	-13.5574	-19.0845	-17.3885	-16.4102	-29.1191	-1.21394	-25.0368	-10.0834	-12.3828	0.56173	0.81222	1	1
17251	-67.6574	-79.6944	-65.8797	-95.2953	-96.7764	-78.4278	-71.7087	-124.533	-92.9383	-70.2935	-76.3619	-53.2637	-79.2005	-105.392	-79.6042	-68.6149	-93.7247	-104.55	0.681685	0.867931	0.407117	1
17751	-38.7866	-23.6251	-6.86409	-99.7799	-80.5366	-13.595	-32.8974	-126.514	-101.768	-55.681	-36.4486	-37.8985	-71.727	-99.2492	-100.473	-40.996	-87.7094	-93.0642	0.66152	0.861197	0.231993	1
18251	-26.3166	-33.5518	-26.3268	-22.1236	-33.3058	-16.5091	-37.3795	-27.4716	-30.9251	-29.1292	-48.6217	-47.5236	-41.4999	-30.6964	-45.0281	-43.5935	-36.7156	-40.0343	0.00143138	0.0512356	1	1
18751	-32.8462	-59.5295	-52.6608	-49.5282	-67.2015	-44.6217	-49.9194	-55.3129	-29.0245	-47.7566	-63.6136	-43.6575	-55.6001	-50.1863	-47.9205	-63.2223	-57.3335	-50.8649	0.361172	0.694289	1	1
19251	-59.0658	-66.4628	-45.6465	-62.261	-68.7689	-53.1809	-60.8559	-54.5532	-59.6698	-63.2559	-47.1083	-57.265	-48.3815	-56.1879	-31.62	-57.8808	-61.8429	-48.6116	0.126484	0.462635	1	1
19751	-63.1083	-79.3247	-62.014	-63.3706	-66.156	-53.7036	-75.0197	-57.963	-53.2761	-66.3032	-39.6587	-51.4714	-57.3946	-56.165	-32.2464	-36.0941	-72.3747	-52.826	0.0381778	0.26687	1	1
20251	-13.3267	-30.9771	-13.5813	-26.8319	-17.6239	-15.3578	-41.1085	-30.8936	-24.6423	-28.2614	-8.86593	-21.9138	-25.016	-26.507	-15.6921	-28.364	-21.0886	-34.1247	0.92257	0.978107	0.522775	1
20751	-41.9964	-50.86	-50.8209	-46.5354	-56.4749	-50.8108	-55.1165	-45.9024	-44.9386	-43.3028	-34.6752	-33.4886	-67.7454	-51.089	-43.1804	-44.5436	-36.8275	-51.2314	0.452274	0.759298	0.337642	1
21251	8.48665	-10.1911	4.35238	-3.9719	-16.0204	11.7207	-3.21432	-13.9575	-6.24346	-11.2435	-28.1058	-16.2027	-33.0734	-11.5417	-22.3309	-22.1473	-5.22443	-5.53312	0.00762206	0.129314	1	1
21751	-65.2305	-71.6718	-49.6673	-50.4266	-58.5188	-57.4905	-61.2463	-62.4776	-56.4857	-57.7178	-57.543	-40.624	-66.8252	-46.7783	-56.0217	-40.3991	-50.3254	-49.0532	0.0583499	0.328847	1	1
22251	-47.9641	-42.0051	-39.302	-42.3819	-38.8602	-58.701	-43.8811	-49.972	-31.6776	-52.2717	-35.1998	-26.0149	-34.7637	-38.7997	-38.607	-36.567	-37.0731	-42.0605	0.105436	0.424723	1	1
22751	-56.2756	-41.8502	-37.0242	-45.8798	-44.7782	-53.8961	-52.963	-56.8324	-56.236	-46.6902	-61.4477	-43.0598	-62.4165	-42.1087	-51.2653	-34.5841	-65.941	-44.9999	0.864124	0.962726	1	1
23251	5.58397	16.4176	2.86784	7.41428	13.663	16.9499	-2.21025	-5.97076	2.65813	6.19597	-26.5757	-13.0862	-3.91478	-3.10239	-19.2143	-9.99489	-17.2583	-6.43097	0.0186463	0.195511	0.922562	1
23751	-22.7093	-26.1952	-27.9296	-12.1964	-22.6089	-6.65667	-47.2611	-12.8179	-26.7002	-20.6633	-28.7839	-19.4764	-22.7549	-31.1111	-36.7085	-31.2758	-24.5072	-18.5324	0.563082	0.81222	0.658166	1
24251	5.75788	-10.8453	-7.45107	-6.48778	-0.85473	0.225915	-10.3486	9.26678	-30.3277	-17.8959	-3.46587	8.31986	-14.4212	4.19374	-24.3457	-17.0101	-7.17062	-2.26622	0.636732	0.856789	1	1
24751	2.08789	2.60302	-1.01677	-5.83645	-12.8049	-15.6822	0.0922991	5.67336	-26.506	-25.3181	-15.4349	-3.31218	-3.39807	-15.5215	-31.6403	-19.3046	-2.72974	-6.69636	0.126891	0.462635	1	1
25251	4.72588	-11.5397	-19.716	-24.7901	-22.8723	-22.3888	-5.74055	-9.40867	-22.9428	-16.15	-5.65455	8.49414	-20.8852	-19.629	-13.5588	-15.4161	-16.7066	-15.6034	0.737661	0.893003	0.247517	1
25751	22.2396	2.91867	5.30872	-3.08278	7.99179	2.465	6.69435	2.67371	-6.70716	9.11369	26.2886	22.5423	-10.2002	-5.53744	-1.64554	21.7825	0.0502979	-12.6167	0.902378	0.971441	0.170097	1
26251	-19.7427	-46.1934	-46.344	-32.8467	-27.863	-39.4655	-42.5415	-45.274	-44.8882	-28.4573	-17.0614	-24.6468	-33.8664	-29.8899	-49.2612	-25.2679	-4.36654	-32.88	0.145249	0.475058	0.543591	1
26751	-19.1847	-20.5134	-39.3215	-17.8978	-26.2347	-21.4219	-33.4827	-28.2364	-41.0856	-18.9507	-20.3909	-13.9052	-22.9432	-12.0856	-35.7463	-21.6459	-9.39378	-15.0331	0.121291	0.457337	0.687611	1
27251	6.06196	24.1216	31.3942	14.9877	7.16079	21.5594	19.8606	14.1407	16.7815	12.2084	3.20063	19.1897	13.3108	18.2541	-1.15629	12.2911	-0.657597	14.337	0.0690233	0.35022	1	1
27751	-10.8032	-19.7773	-11.7712	-9.88933	-15.8309	-13.2971	-6.11497	-14.0428	2.69824	-9.06087	-7.57118	-6.30382	-8.96824	-9.36193	-20.0981	0.507554	-19.5921	-2.52931	0.607287	0.845694	0.972288	1
28251	5.35336	-11.0559	5.61156	10.801	-14.2111	9.28761	12.182	6.43192	12.7519	-12.8682	-2.48823	-5.76783	3.37885	-4.05379	-15.7691	-2.0162	0.510951	-1.27656	0.0419983	0.282498	1	1
28751	0.520965	-16.0009	-18.1061	-0.378024	-7.37856	-5.09985	1.09382	2.30479	3.70704	-14.7161	-27.3664	-6.97092	10.8772	-18.5261	-6.50428	-3.08587	-12.3053	-12.6701	0.327206	0.67521	0.590755	1
29251	3.60959	19.7457	-11.9663	20.7712	25.2298	10.1	13.3174	22.0637	5.04984	15.7537	5.99262	14.3603	19.9968	0.107555	-1.41654	12.8415	4.3633	13.4713	0.623121	0.851252	0.977711	1
29751	10.6536	10.4411	0.996573	7.83351	11.9259	24.1585	12.6701	23.1439	10.6741	22.756	5.3371	11.5949	30.9502	6.28759	-12.4802	11.0431	6.23193	5.21904	0.554963	0.81222	1	1
30251	-2.14697	6.11337	13.0082	3.65539	9.88144	13.0073	11.4303	11.9101	13.2574	21.0262	5.89485	17.7361	33.5514	3.10722	-12.4346	-2.0827	8.02736	5.62943	0.993898	0.998148	1	1
30751	8.44283	-3.74278	9.54788	9.11645	2.38368	-0.786604	1.7197	12.0755	7.52677	-5.41837	-7.18353	7.49252	2.69978	-13.3571	-18.8759	-6.7808	11.4436	-1.36777	0.0328559	0.249216	1	1
31251	26.9655	18.1385	14.9114	13.9263	7.92128	22.6802	25.4876	34.1617	10.3252	18.9371	16.0995	15.601	1.61619	-3.28237	-11.6956	-0.667215	23.9795	13.9881	0.185377	0.51532	0.154248	1
31751	-8.19428	-8.87399	-17.977	-17.0765	-12.6621	-9.48498	1.27321	-10.4531	-17.6425	-23.7475	-14.4392	-7.56848	-17.8281	-22.6423	-20.5599	-20.0166	-11.7109	-12.3489	0.0609714	0.334404	1	1
32251	6.47707	-9.33592	-25.6097	-10.766	-19.2426	-7.25531	-3.27802	18.8329	-9.88156	-20.9457	-6.40874	1.72065	-16.1341	-7.97997	-15.6549	-11.5846	-12.5621	-0.108006	0.524206	0.807037	1	1
32751	11.79	15.9524	-7.73745	-3.07915	1.98024	4.05683	24.9402	0.590585	27.4417	8.03966	15.3192	22.437	1.66099	21.3397	-9.45368	11.5943	15.279	20.9134	0.602219	0.8434	0.652443	1
33251	-8.8017	5.28363	-2.69449	1.59922	4.77531	-7.50391	-4.66367	5.41864	9.49337	11.6253	7.90411	15.8878	-1.41517	11.1934	-9.12933	9.97915	16.0282	1.10989	0.15714	0.490374	0.782432	1
33751	4.29083	7.59453	-15.1108	0.972771	4.03753	-6.5977	0.463626	5.83007	14.6105	10.6404	13.2284	19.6665	16.5939	8.35568	6.75348	14.3567	19.6555	-2.26791	0.0144314	0.167471	1	1
34251	26.6088	39.1756	14.2176	14.3893	11.1508	25.4741	17.1567	27.5278	19.8126	4.37456	16.123	46.1115	44.0412	20.0138	14.1052	22.9281	32.1715	16.4915	0.680652	0.867931	1	1
34751	15.6216	-10.9264	-17.0068	6.35926	11.0305	-29.4256	-2.38443	9.40111	7.33227	-3.5539	5.02808	45.6237	19.1536	9.0423	19.4106	23.2164	14.6815	8.01849	0.0266397	0.22346	1	1
35251	32.596	14.7801	1.49588	18.032	29.8334	-9.46485	27.2688	14.3068	1.40704	23.1669	9.48559	31.0511	12.4372	19.2219	4.62872	14.2861	23.5737	13.5929	0.674853	0.867931	1	1
35751	17.2363	16.133	15.255	17.67	39.7486	14.868	28.1702	3.60733	11.7163	29.1662	32.5952	34.2805	15.0926	10.8739	-17.557	8.37174	16.9392	14.2476	0.814526	0.944614	0.121734	1
36251	5.37313	24.3969	-1.67831	5.0881	20.8899	25.0051	21.9276	-10.3963	4.43071	32.3156	27.7589	21.752	21.643	12.4846	-7.19031	4.25764	5.09048	9.1644	0.655733	0.859444	0.426752	1
36751	-3.74727	6.88958	-21.2833	-5.23225	-9.79045	6.31975	14.7285	18.605	-9.4169	10.635	-3.31227	8.7889	-0.329782	-8.74645	-12.2889	6.48143	12.9534	0.936998	0.759982	0.903112	0.549504	1
37251	23.1963	51.5916	24.8035	49.8112	50.9213	28.1961	38.0293	47.7936	30.5464	39.3033	33.8591	46.8918	25.0608	34.4834	21.4997	35.6471	35.2552	29.0349	0.356884	0.691462	0.996331	1
37751	6.69767	30.5058	-1.32163	13.5436	17.5861	-6.62967	29.8879	11.0061	-3.11316	19.8567	10.4051	8.0356	3.34608	19.0919	-0.504499	26.7882	15.7258	-11.3754	0.901175	0.971441	1	1
38251	33.5521	27.3011	24.0513	16.968	18.1294	9.30269	37.349	31.9249	20.9934	21.7383	14.7993	15.7127	25.6369	29.537	2.20107	20.6494	33.1709	8.40699	0.341893	0.682639	0.740867	1
38751	14.1167	17.2498	13.4674	19.1456	-4.0469	25.9143	20.4409	12.1721	26.4658	25.5117	30.0851	39.5136	36.5141	26.4499	-10.9215	15.1672	12.7108	28.6806	0.287555	0.636779	1	1
39251	2.83605	25.243	23.0188	21.127	31.3312	20.5911	23.6232	29.0153	35.5279	32.8837	31.0937	32.624	8.96059	31.9698	2.5462	11.8914	23.0871	36.1501	0.985234	0.998148	0.488721	1
40251	9.23272	-5.43999	-7.67697	-2.44848	7.9169	5.45802	4.18621	19.9039	12.2525	-6.98753	3.58877	4.50252	11.7679	6.21072	4.64911	10.7214	-0.693944	-4.02686	0.75178	0.895575	0.423679	1
40751	0.266761	-3.71458	-26.9935	-1.91066	7.95323	5.31097	-6.9599	4.15863	-12.3255	-3.20062	-10.4121	21.7972	10.8306	-3.96171	0.236439	10.664	-7.31897	-7.13317	0.331911	0.67521	1	1
41251	6.96328	0.946557	0.924951	-9.25974	9.58904	4.14553	3.89355	4.54904	-13.0862	0.172671	0.969571	13.0232	7.40556	5.27911	1.5668	8.11109	11.1425	12.625	0.0733212	0.358069	1	1
41751	1.36674	-9.94866	-6.58002	-9.59062	6.97096	13.2744	-3.66368	14.351	-1.39107	-3.54421	-5.50166	-0.336418	0.0153722	9.68203	1.12557	13.7169	11.7923	4.92799	0.560216	0.81222	0.423622	1
42251	-16.9589	-17.9497	-18.4843	-13.6876	-10.6606	-12.6851	-23.9005	-11.9648	-31.2412	-26.5763	-28.8295	-14.6733	-4.27196	-13.5477	-15.5263	-5.15539	-14.6915	-13.8285	0.672772	0.867931	0.139862	1
44251	-6.60288	8.48657	7.4004	18.8068	-3.20199	1.15821	2.17865	-4.30486	-3.15803	-9.87318	5.50692	12.908	4.04589	-14.7661	-6.34873	19.6221	4.9276	3.93854	0.986353	0.998148	0.784222	1
44751	7.68867	11.9088	1.38137	13.1266	25.3781	17.4943	-1.43713	6.12715	-1.07816	2.1297	19.3071	12.7356	15.9841	7.23894	1.9115	22.1262	15.1308	14.1406	0.591318	0.836527	0.0712381	1
45251	25.6058	27.0582	13.8779	5.14845	29.3397	7.0624	7.8207	4.25349	8.00477	3.92763	1.28047	1.22252	13.7258	21.2659	-6.94194	2.4742	21.1336	19.0442	0.375013	0.707366	0.570184	1
45751	24.1997	21.8356	-6.71428	24.6958	25.3515	32.4988	1.76647	26.491	45.7141	-1.64404	6.79873	3.9149	24.8882	9.48555	-14.1779	2.67743	18.1654	18.923	0.0471219	0.296191	1	1
46251	25.1653	39.0836	22.868	41.5933	44.715	37.9855	28.5995	27.12	50.0318	14.7927	22.9506	22.5832	22.4946	22.3331	-11.2852	16.1521	31.4835	29.989	0.0439506	0.287494	0.855168	1
46751	-2.99795	-10.082	-21.3032	-3.93196	-4.17585	-13.6749	-15.2138	-27.2957	-0.168128	-0.586266	-1.71728	7.34101	-18.3984	-5.14123	-25.4278	-3.24461	-16.8739	-10.7619	0.661901	0.861197	0.446155	1
47251	-4.28925	-14.9243	-22.9167	-18.7243	-3.10018	-11.1287	0.0792501	-6.52239	-3.45333	-20.4745	-4.75172	-0.504461	-11.3685	-25.8512	-9.76701	-4.76451	-5.42985	-8.58015	0.87361	0.962726	0.675666	1
47751	5.92767	-15.5982	-6.51363	-4.34635	8.2801	-3.07967	8.07987	25.2581	7.13184	-1.7893	-1.01286	-4.1374	5.94908	-12.9871	-16.2395	7.42124	-3.23721	13.6596	0.576686	0.824002	0.210025	1
48251	-7.24625	-17.2623	-1.54872	2.30371	2.62482	-16.6987	-8.42275	6.77661	-15.7643	-11.5805	-0.592724	0.236539	10.9145	-6.44619	-23.281	16.9935	-19.0398	1.25185	0.628426	0.851446	1	1
48751	18.3078	6.05618	28.6568	15.925	12.2726	24.0956	18.656	16.9347	7.98333	13.8002	7.92849	11.1619	23.7508	34.2898	-0.377111	15.2905	3.80591	24.2598	0.708418	0.881585	1	1
49251	8.76835	-0.748645	-18.2387	4.06736	-5.45151	-9.61405	11.5541	-0.472098	5.39007	-11.0971	-6.26484	-6.19251	14.5627	22.8737	1.96342	3.39128	15.3701	5.50545	0.515997	0.799796	0.14027	1
49751	61.5893	63.0903	35.2777	56.2624	41.2022	56.2254	35.7734	45.6993	47.0705	43.0793	32.9486	42.8768	61.9434	64.6855	69.2155	52.9922	66.7223	54.5546	0.563884	0.81222	0.0643151	1
50251	40.7699	18.4259	32.9671	30.1436	28.9616	41.4167	38.6727	-5.35484	9.8739	22.7287	-1.04102	16.1025	38.6354	43.869	12.7669	3.89027	30.9787	11.8729	0.500564	0.786129	0.622663	1
50751	31.4778	16.9721	40.3502	23.535	37.9454	47.8681	36.1072	-5.56695	19.3078	30.4926	16.0119	26.1923	52.5575	23.5945	3.91402	25.5415	49.3772	19.036	0.984952	0.998148	1	1
51251	1.42111	-17.1852	-4.09686	17.1161	9.1796	16.3936	5.0508	7.42912	-3.55986	-3.40201	13.2333	7.66731	1.32174	17.6534	-7.41418	0.931577	18.4627	4.49655	0.720783	0.886067	0.307779	1
51751	19.5303	34.2262	22.5961	31.288	28.4909	20.9451	35.4378	26.8249	4.1195	13.5283	8.07109	13.4596	9.93017	31.1951	20.8035	4.76548	24.6658	15.8113	0.049936	0.299196	1	1
52251	30.3629	47.3796	52.4067	27.4647	28.5278	35.7209	36.3194	31.3827	22.7611	27.499	16.538	23.7901	25.3962	24.4229	32.3903	27.9148	33.4253	18.7839	0.117713	0.452764	0.424172	1
52751	-3.18085	14.078	-5.42875	-13.8359	0.0711388	-26.7573	6.69335	-13.4417	-16.6827	15.5932	-24.0136	-4.08041	-8.38773	11.8919	4.93556	13.0847	-15.1378	-11.2028	0.476486	0.776667	1	1
53251	10.6652	-3.30124	-3.7494	0.113159	4.18559	-8.1149	8.25495	-5.37682	-4.97246	0.309418	2.59998	-5.14611	-4.74258	2.4705	9.70218	4.73089	12.0958	-5.83436	0.511365	0.794342	1	1
53751	6.91688	10.8963	9.91298	27.8319	21.2417	11.0782	23.7484	26.3173	12.6032	17.171	16.6405	11.4331	2.14477	7.87403	14.0982	4.15088	10.2824	4.50565	0.207992	0.54916	0.137973	1
54251	17.6726	13.9197	11.1273	23.4462	30.2651	18.3786	17.8131	56.9763	35.3174	7.53028	23.7522	14.246	22.0581	26.2168	18.2243	25.8596	42.9191	33.9072	0.901014	0.971441	0.107703	1
54751	-17.117	-35.0748	-22.1276	-14.4051	-16.5873	-29.3743	-14.6234	-3.27761	-9.46139	-2.29052	-26.2929	-13.9973	-6.99355	-3.28284	-2.25242	1.88119	5.3225	1.10874	0.131354	0.462635	0.0857902	1
55251	-7.64987	-2.85012	-10.8993	5.8131	-0.654128	-3.36588	-3.29043	2.71071	14.2117	12.1786	13.2909	-0.662048	5.988	23.0796	2.99169	-1.25736	1.87548	16.6244	0.0311473	0.242964	1	1
55751	-8.2581	-22.9107	-15.1015	-12.9711	-15.805	-13.7023	-9.05178	-28.3641	-7.07823	-4.09236	11.799	-4.60922	-11.883	21.0233	-17.9029	-6.16106	2.45413	-12.0055	0.0182256	0.193954	1	1
56251	21.9086	1.34806	9.09457	6.23551	-6.58909	4.29747	24.3721	-7.82412	10.4491	11.704	3.8991	8.14794	9.8032	10.6846	-5.36925	13.6971	23.7389	16.188	0.540433	0.811386	0.839624	1
56751	14.0302	18.3255	17.0918	19.1443	8.68296	17.419	14.6181	20.8544	26.8459	22.4378	2.71961	14.005	34.3066	18.1219	21.4685	17.2317	10.773	23.6482	0.832643	0.949879	0.70044	1
57251	-33.8517	-33.5737	-33.7138	-36.5931	-35.4715	-41.9498	-44.5586	-30.4419	-23.1024	-30.1835	-33.3728	-38.7971	-23.4863	-18.5414	-18.2188	-24.8484	-27.4267	-39.848	0.224285	0.56869	0.235289	1
57751	-2.51159	-16.8314	-16.205	-14.1318	0.792293	-7.12436	-9.92052	-17.1703	4.59577	-11.8683	-24.4132	-15.9916	-7.61549	-24.1305	-8.06297	-17.1335	-2.96666	-1.80101	0.326682	0.67521	1	1
58251	-14.987	-11.7471	-11.4659	-6.56588	-0.429944	-21.8198	-13.7911	-16.9124	2.9164	0.904324	-6.05757	-6.13564	-18.5167	-26.5674	8.60222	3.07736	15.5978	-2.48959	0.247225	0.595493	0.935364	1
58751	-41.5242	-34.5481	-31.2201	-37.1244	-32.5164	-49.561	-38.9524	-47.9176	-37.6806	-9.88169	-28.7071	-25.1915	-32.2767	-40.7644	-11.4934	-10.3343	-11.3456	-25.5176	0.00107318	0.051012	1	1
59251	-50.2917	-49.4904	-42.8055	-48.0178	-38.2717	-43.9549	-37.2687	-35.3554	-40.5846	-32.0677	-28.1909	-28.0902	-36.2702	-46.6546	-15.9193	-29.7499	-29.8278	-38.8351	0.00441852	0.0954668	1	1
59751	-27.8741	-23.6094	-19.9133	-17.1143	-8.2542	-21.3761	-19.1766	-20.3503	-6.67893	-8.63502	-10.789	-5.61788	-7.00083	-4.17306	0.616347	0.174808	-1.21472	-23.2881	0.00320746	0.0788592	1	1
60251	-31.4893	-11.0273	-3.74627	-19.0098	-22.065	-21.6709	-13.4037	-17.6216	-1.2652	-6.99829	13.1138	3.89656	-13.0872	-6.14306	15.4407	4.60688	7.27718	-4.04472	0.00150904	0.0512356	1	1
60751	-34.2365	-30.4189	-28.7969	-27.3695	-36.6661	-31.7241	-9.9331	-28.2062	-31.8653	-15.9614	5.05742	3.12736	-16.9655	-18.0115	-3.43761	-13.5982	-20.3482	-10.3021	0.0158344	0.176405	0.616452	1
61251	-4.22002	10.7022	-8.57056	0.403934	-1.8073	5.81171	6.5326	2.55539	-1.03339	26.9925	24.8611	12.1137	10.6925	17.4282	13.8766	7.27319	3.1575	21.2067	0.0137867	0.167471	0.99506	1
61751	6.26006	22.9468	-0.0199559	17.4447	22.6196	17.0378	8.97605	43.3223	5.3067	13.5256	23.3153	32.7327	14.1507	15.7293	17.1407	13.0879	21.411	27.9101	0.439692	0.75151	1	1
62251	3.24456	-2.10174	-9.63378	8.4144	-2.71854	-2.32395	-10.3535	5.86102	-14.3841	2.39379	11.2885	4.59664	9.32906	4.60898	10.1581	15.2289	-3.41868	7.40264	0.00830114	0.13137	1	1
62751	3.4223	-1.67137	-13.3295	14.2562	-0.071692	1.89609	-2.00067	1.94864	-13.1716	26.3623	6.30711	14.8718	20.3298	14.7564	16.1017	5.16115	7.61322	7.02189	0.0366288	0.259993	0.432972	0.863327
63251	21.5756	24.5903	16.1722	23.8184	22.2175	8.15805	8.33445	5.03002	6.08287	25.1268	19.7635	20.2676	20.7521	21.275	22.8351	-2.93009	11.9783	4.88164	0.907673	0.971441	0.00363251	1
63751	16.0118	37.8357	14.5388	21.4477	26.7291	25.8029	19.528	29.4852	14.0882	26.0801	31.9938	39.2352	25.3148	43.7881	33.2989	33.6816	19.7879	26.9657	0.035591	0.258943	1	1
64251	42.4896	75.6093	60.1332	36.9064	72.2875	40.53	54.3795	58.967	42.5569	51.8348	40.3455	51.6756	33.6801	66.856	70.9101	55.6689	43.2953	56.8016	0.821395	0.944614	1	1
64751	45.9077	68.646	38.797	27.8305	46.7039	32.022	45.6832	37.3269	37.1665	53.2925	48.3148	49.2285	44.7179	59.7167	53.6711	58.0154	39.5271	38.9911	0.22669	0.56869	0.757211	1
65251	38.76	48.198	29.6772	40.1165	31.4954	37.1419	28.1952	39.993	35.125	49.6589	43.6603	49.062	35.5129	41.9759	44.0109	46.1488	33.4881	37.2556	0.118112	0.452764	0.927191	1
65751	6.20675	12.9607	16.1493	11.4827	12.0048	9.41131	-5.56875	-0.669393	2.22567	20.9825	16.0953	17.4755	20.3635	13.1008	40.816	21.3505	32.4102	24.7528	0.0315805	0.242964	0.291682	1
66251	58.3081	70.8101	69.7643	58.953	68.3224	55.1027	61.685	74.8999	66.6324	71.9753	66.5483	47.7907	67.9359	58.073	73.1741	48.8104	72.3019	71.847	0.871163	0.962726	1	1
66751	32.4105	26.6337	16.1673	26.2472	17.7738	7.03745	11.5382	38.4977	26.6304	20.3043	32.8289	28.8828	14.5621	41.5134	26.6521	33.7332	26.1392	32.9292	0.177101	0.512525	1	1
67251	62.8375	56.6032	61.2077	54.8364	62.0132	40.6245	47.7947	59.3924	30.4073	42.8032	46.023	45.435	59.8388	55.3937	35.0703	36.4929	41.6536	53.2248	0.173305	0.512525	1	1
67751	25.0542	37.0308	25.9196	30.9202	37.4036	6.5191	16.644	43.8482	18.7085	25.2604	50.094	39.8099	38.4244	16.1665	51.8802	29.6429	18.8028	49.7326	0.170595	0.512525	1	1
68251	5.04296	15.2011	11.3869	24.097	-4.29656	3.72615	-13.0352	9.66879	3.09204	12.9079	42.3076	25.0371	20.6312	9.9359	54.6617	14.5311	36.5537	15.4049	0.00641195	0.120308	1	1
68751	86.7958	83.3737	76.4512	73.4062	77.039	90.2597	88.2504	76.9334	60.9382	68.8241	58.9795	42.9281	91.4494	69.1241	80.537	51.3142	89.6003	65.4314	0.208727	0.54916	0.673221	1
69251	0.264508	0.426791	-10.6912	-11.7508	-7.19793	-25.032	4.66597	-6.81775	10.835	18.0609	22.6875	15.4934	34.4884	21.0767	33.739	35.2712	24.8099	7.94909	0.00902765	0.136951	0.328577	1
69751	81.8596	49.132	72.7231	67.4686	51.7311	57.2182	73.6375	72.4536	60.8844	77.2152	71.9268	77.7564	81.4076	77.219	41.5536	72.5364	86.4805	57.7166	0.300845	0.644886	1	1
70251	52.0907	47.2428	67.8694	42.1866	55.8241	61.9653	54.1459	37.8671	27.0408	45.4037	57.1821	61.8396	68.9541	46.0539	35.4405	49.4522	35.6448	45.6626	0.991628	0.998148	0.845866	1
70751	37.4026	22.6788	42.1279	29.0066	51.1231	41.7198	43.5827	38.6911	25.9974	47.5443	57.2575	58.377	49.9084	35.8958	46.5141	43.4019	37.6457	43.5235	0.0901061	0.389368	0.766775	1
71251	37.4107	57.7245	41.4206	30.1023	61.6955	37.893	30.5597	53.1562	41.2297	50.1155	70.0288	63.1113	40.1972	58.0724	41.728	61.1558	43.4157	43.1866	0.113448	0.444443	1	1
71751	56.0902	67.6928	56.3921	34.4036	51.8848	41.6679	30.075	55.1579	57.0307	77.2866	74.2425	58.5139	44.0487	56.8996	57.0389	66.8073	55.5019	42.9271	0.287454	0.636779	0.265616	1
72251	21.382	48.931	39.2078	29.448	32.5472	25.2831	30.3712	47.9243	42.6589	52.0727	41.9827	19.354	37.6096	46.5758	40.8302	27.8494	55.2101	26.8521	0.521688	0.806862	1	1
72751	55.511	71.8762	47.9734	57.1079	73.0367	56.7997	67.6556	58.2084	56.4546	69.4365	35.3551	35.0027	61.8525	67.3172	52.0016	52.4632	82.6105	40.7777	0.401835	0.729029	1	1
73251	47.6028	44.6855	47.7322	33.7278	43.8775	32.9593	43.7436	38.0181	19.3415	33.0914	43.3424	50.0635	48.1629	66.0977	41.3595	53.3857	54.2245	42.9791	0.141439	0.472502	0.694603	1
73751	55.7121	72.6788	51.0431	55.4651	59.9126	56.2716	60.8258	64.5291	36.2191	40.15	41.8323	51.8283	54.5847	61.2004	46.6758	67.0056	46.8497	57.2985	0.277795	0.634991	1	1
74251	49.2569	59.8454	55.4061	67.3028	65.2473	62.4283	66.361	73.3425	47.5683	47.8412	30.7695	56.4234	56.5383	79.0715	73.448	45.629	58.7229	51.7463	0.550547	0.81222	0.144196	1
74751	14.027	29.235	19.7548	21.405	27.1222	27.3251	38.2332	26.6113	30.3899	38.4247	31.8157	30.795	32.5526	42.0938	47.4582	29.3104	51.6531	23.9141	0.0147976	0.167471	1	1
75251	46.8405	59.1581	51.9801	49.4515	40.6909	59.8939	46.0019	33.3338	24.1937	49.1506	48.2284	29.2074	66.8815	52.6345	37.2214	45.8488	52.3678	27.3349	0.966352	0.991379	0.585151	1
75751	44.5181	66.7399	48.0127	60.8561	39.1359	62.1121	48.7426	58.8427	37.9187	51.4116	40.7259	43.266	51.928	54.0916	44.3907	38.8216	38.0625	54.8454	0.206853	0.54916	1	1
76251	49.1541	64.0391	61.2433	62.237	53.8634	50.2957	61.12	49.8899	34.9354	59.7893	34.5093	53.7137	43.8119	32.546	47.9841	48.0604	67.2859	52.89	0.370046	0.70171	0.867924	1
76751	30.3371	37.1608	49.8081	45.1551	31.5496	32.2476	41.9098	42.7541	29.1621	39.572	18.9263	35.8393	47.0787	15.7444	34.9288	55.4126	60.8227	19.5895	0.82277	0.944614	1	1
77251	18.6521	31.6318	38.7061	28.5561	47.2496	48.0836	22.0548	42.8971	39.2761	39.309	32.0863	62.0373	61.2137	53.4584	48.5478	51.1796	51.9677	37.2895	0.0161649	0.177316	1	1
77751	0.202846	26.6283	17.6934	17.0074	40.1239	16.603	0.157478	25.9701	7.49234	36.7952	-1.70498	7.39716	35.7651	35.5192	30.4399	36.1543	15.9804	5.36708	0.481646	0.776667	0.861442	1
78251	-24.9232	-39.6059	-23.1902	-39.8575	-34.5489	-39.9177	-38.5159	-23.2517	-29.3114	-28.9365	-35.9266	-34.4628	-28.6518	-20.3366	-4.06468	-23.8939	-31.8679	-24.5445	0.271721	0.629017	0.303563	1
78751	31.066	3.58913	12.5809	7.19698	-7.84756	17.4821	6.33982	-14.9272	9.92604	23.4189	-6.61241	8.03508	13.9962	5.9169	7.14572	21.6631	18.3287	17.8339	0.438232	0.75151	0.885543	1
79251	7.65682	-2.7121	4.46658	2.10012	3.25182	5.34649	16.2868	-17.0071	3.08103	-5.43513	7.83454	12.3966	11.0697	2.91913	-2.33036	3.90466	11.3638	4.62438	0.474714	0.776667	1	1
79751	28.6588	14.1845	36.5076	27.1738	34.0933	28.0927	43.7548	35.3235	42.1659	21.5618	39.1369	46.7518	23.5796	40.8334	63.2996	8.97868	38.6908	23.4302	0.806988	0.938634	0.689427	1
80251	28.5502	29.7708	44.9476	31.1482	29.2516	18.0171	37.291	35.2492	45.0115	31.6754	29.605	34.1169	32.8564	35.9875	71.4152	32.0019	43.8268	38.8296	0.380952	0.709188	0.697413	1
80751	11.081	14.6153	26.724	9.48689	9.44897	12.2673	20.5984	18.823	21.5202	15.1041	13.7437	1.43735	20.4957	26.2234	34.5225	27.0343	26.9483	19.7246	0.49719	0.786129	0.0297192	1
81251	-9.41941	5.39767	13.8157	2.92522	-4.97421	-1.87	7.91335	14.4667	-8.26716	-6.12331	2.66862	-4.44565	11.2368	16.1066	45.3995	20.3375	17.6483	-3.29166	0.329753	0.67521	0.341401	1
81751	34.8597	23.8429	31.6089	28.0026	-0.371636	37.0869	20.1417	28.9097	26.3064	21.1583	9.11669	17.7052	31.0223	48.8352	43.1914	25.3183	31.1625	2.50544	0.996215	0.998148	0.277925	1
82251	10.1875	12.7931	7.30602	16.295	-1.69011	14.1522	1.44315	10.72	20.2693	18.9462	11.8924	12.2577	18.5495	30.0383	9.67023	22.1141	4.14807	-1.03747	0.334298	0.675225	1	1
82751	0.671134	6.46388	-6.14031	2.9941	2.36287	-2.66888	-23.7134	3.58771	16.7027	20.4286	-17.0591	1.46095	16.64	11.3206	23.4317	33.4116	-1.25052	-5.6296	0.175411	0.512525	1	1
83251	28.6347	37.7699	28.1409	23.3336	20.7414	25.8559	41.3527	28.3597	31.3424	33.5843	12.1017	15.5882	36.6993	38.1262	38.8934	38.9853	27.4295	30.5784	0.911296	0.971441	0.0692821	1
83751	26.9801	47.8331	36.3843	42.075	19.3944	21.0987	39.188	12.4049	22.9434	21.3733	12.7933	9.78265	31.6459	15.276	45.5901	35.3754	34.6359	28.543	0.617978	0.851252	0.482387	1
84251	34.178	67.6667	35.5235	44.5957	49.3933	28.3502	27.9843	24.7017	21.1251	41.255	0.319783	24.2811	43.0905	37.344	44.2398	26.7398	23.1392	11.5773	0.386454	0.715693	0.262014	1
84751	53.6762	73.288	57.4672	61.6051	80.0001	44.1017	50.5094	52.8433	40.2153	54.4042	11.5074	43.6386	72.3763	61.4779	56.6056	27.4787	38.9252	31.6472	0.297364	0.64444	0.161446	1
85251	80.4034	69.981	82.5085	64.1401	73.1406	45.5746	66.5484	77.1204	48.7297	56.2606	45.7649	44.8811	61.1943	61.4411	64.5184	56.8691	68.6103	66.0767	0.258565	0.610454	0.237532	1
85751	56.381	34.3342	56.7884	49.8659	48.4577	33.4547	32.7976	55.0964	22.0756	37.4905	27.2111	25.7977	50.3835	63.5772	58.6016	36.7062	38.1255	52.3607	0.990403	0.998148	0.153658	1
86251	49.3508	35.0617	55.2993	42.5227	33.4748	29.3903	36.0943	42.6286	20.9657	28.8585	27.0523	27.2125	48.6105	57.0868	24.657	22.2725	46.7352	26.7148	0.563455	0.81222	0.632814	1
86751	53.2183	45.0214	53.2263	53.0534	42.7155	27.7759	41.5291	54.4239	44.0791	41.9869	41.8852	41.4365	46.2257	55.4147	33.6034	40.4163	59.5971	46.5094	0.823658	0.944614	1	1
87251	45.8607	48.6606	49.9647	61.5188	56.9295	35.5988	48.2885	52.268	54.1451	49.814	20.6647	33.0519	47.3142	56.6165	37.2641	29.4244	51.5454	48.818	0.080841	0.374324	1	1
87751	47.0851	60.3971	53.0743	57.747	53.2354	52.8907	46.593	53.5749	50.6264	63.9683	36.1803	34.7817	49.3859	34.215	30.6401	21.7374	47.1469	51.741	0.0205679	0.196437	1	1
88251	7.44943	20.7412	29.2662	12.1564	32.8632	18.9749	33.1875	23.0114	23.3319	45.0908	14.7643	17.1784	15.8741	18.9046	24.7149	23.4105	24.7224	41.1167	0.563391	0.81222	1	1
88751	60.2363	56.1424	83.2193	50.2404	47.6325	50.5769	66.4761	80.5049	67.8681	58.1059	46.9622	57.9985	41.8817	64.8887	68.8634	60.8633	52.2161	56.4034	0.421948	0.734841	0.283844	1
89251	71.5977	77.3992	77.4513	59.974	76.8696	93.8151	86.8718	93.6146	74.6639	70.4938	71.3968	68.0303	67.8071	74.1757	79.1115	67.4552	98.9228	72.0027	0.34517	0.682639	1	1
89751	42.4076	51.644	29.275	12.7985	34.5016	46.9809	39.4233	36.2203	41.7956	56.7124	41.7846	30.0303	27.2049	40.6203	49.4629	42.928	52.0812	38.7722	0.333344	0.67521	1	1
90251	41.2954	21.2782	30.0512	34.0554	10.4282	48.3349	25.8555	36.2304	40.8869	47.1868	28.9023	24.8744	18.1141	40.2406	43.6459	31.3325	26.6944	34.7267	0.872888	0.962726	1	1
90751	70.717	25.316	56.3348	55.25	32.7442	53.5701	45.0092	42.2423	48.4859	45.6217	29.8877	36.544	39.8586	60.7118	49.8012	38.1674	40.0761	47.0151	0.400068	0.727675	1	1
91251	71.084	54.8422	66.1284	55.1409	47.0657	64.6667	41.8616	53.3144	54.3196	62.4445	38.1631	32.2987	43.4165	57.4292	61.3896	45.1572	68.8975	39.8477	0.230283	0.572098	1	1
91751	48.8051	65.9108	39.428	54.9017	31.4566	49.1568	62.1381	57.9533	33.7267	64.6306	41.5383	36.8207	44.2297	47.9103	67.1007	50.0839	57.126	34.3981	0.994402	0.998148	1	1
92251	22.8693	25.2018	24.1142	57.1362	22.084	44.0599	29.1993	57.7885	27.9757	51.2476	35.9699	24.2476	35.1808	50.5653	73.9503	57.1716	43.1703	41.0292	0.183166	0.51532	0.921422	1
92751	24.1195	19.0178	19.7228	35.8152	18.4431	36.592	9.21997	45.2812	23.198	26.0089	30.4795	28.8934	32.3544	43.9727	31.902	33.5502	40.6409	33.3511	0.0834748	0.374324	1	1
93251	32.8851	37.6711	44.5633	38.648	27.5204	27.0717	39.156	32.3699	27.9784	27.8843	30.6623	12.6637	49.3439	45.059	35.5991	26.9164	40.4609	41.299	0.97246	0.994783	0.125822	1
93751	50.9802	24.8153	32.0081	29.1464	44.6154	30.4044	35.6337	34.1662	36.7862	25.7551	27.3422	29.5743	23.2737	41.4475	39.6611	41.2989	42.3526	27.5556	0.555781	0.81222	1	1
94251	9.59649	8.62046	-1.32513	2.1833	15.416	1.67562	6.16986	11.1792	1.46361	12.0625	9.27892	-1.31566	3.95192	9.54837	18.8115	21.3027	11.7747	4.42524	0.21632	0.562905	1	1
94751	-33.0881	-3.18875	-39.436	3.32291	-9.38128	-11.7378	-8.01055	-3.49267	2.9932	0.42505	15.1255	4.29214	-4.21223	1.10803	25.6442	-2.27112	3.91538	-3.78035	0.102007	0.413243	0.41434	1
95251	35.5354	60.4625	39.5989	50.7628	39.2333	53.0239	58.1617	34.3899	53.3883	44.0803	48.3488	34.9608	32.5945	57.2084	42.7279	30.2398	35.8436	32.8356	0.12159	0.457337	1	1
95751	-15.1949	-16.8768	-16.4145	-10.1421	-23.195	-6.89918	-23.7495	-39.943	-3.54742	7.3035	-10.6387	-24.8201	-11.5786	-6.17346	13.9268	2.97257	-12.3786	-28.5863	0.126339	0.462635	1	1
96251	-26.4488	-6.23815	-9.5292	-5.51535	-3.33994	-27.2538	-14.0471	-23.9417	-18.7892	0.879569	-15.8178	-17.3684	-5.99594	-1.4697	38.2161	-1.60706	-11.3311	-15.6485	0.176253	0.512525	0.75475	0.973487
96751	4.40946	32.8675	27.202	8.45132	26.0494	18.8589	31.4951	27.3374	10.0114	8.92526	-9.29789	-1.59253	38.2596	40.37	41.2773	9.83409	9.79708	8.56066	0.73294	0.893003	0.00546136	1
97251	-9.19897	9.03912	-4.8422	3.99848	-3.18635	-8.32851	-1.92799	-10.6234	-13.4864	-2.63151	-21.7592	-21.5663	10.1891	3.37316	22.4598	-2.16516	-10.7501	-27.2406	0.894551	0.971441	0.0597862	1
97751	14.1569	32.3064	19.2165	25.6033	14.8955	15.8221	26.819	7.75128	9.28547	25.5234	14.1031	8.87144	22.5766	19.8217	22.2667	11.0584	4.70791	9.90778	0.525249	0.807037	0.568967	1
98251	-40.1024	-27.9199	-15.4834	-28.8325	-34.6281	-36.3025	-12.5569	-43.2891	-34.1749	-10.016	-32.5029	-28.8511	-24.7948	-14.1864	2.90275	-5.83389	-28.9441	-21.549	0.0364739	0.259993	1	1
98751	-26.7659	1.88449	-19.7802	9.68581	-5.91825	-8.64335	-8.79113	9.65954	-3.0666	17.5442	-5.18763	-9.85165	-5.23738	7.7476	37.5694	11.362	-5.24015	7.09469	0.0821964	0.374324	1	1
100251	68.0378	47.7897	58.3503	57.3957	54.5938	44.5583	51.9463	61.9236	44.1117	49.9565	48.5153	30.1865	54.6865	47.8898	58.726	32.6245	52.7602	49.0638	0.106298	0.425525	1	1
100751	35.1357	40.4348	48.6904	26.7446	43.3561	23.1213	45.6789	47.0421	44.2288	39.7487	29.6461	18.6886	27.0871	27.6989	53.3155	46.5482	44.6988	21.5676	0.332861	0.67521	1	1
101251	42.7787	34.4502	38.4359	41.1175	55.9434	38.4973	38.5738	46.9918	52.4388	45.2416	31.0213	23.5853	38.6578	50.7665	38.3898	48.7098	53.8618	33.2053	0.544303	0.812147	0.86512	1
101751	76.1467	56.6556	65.1457	72.9698	57.3575	55.0268	60.8405	65.276	69.6001	59.932	55.3767	42.0799	47.5772	65.3515	51.5851	33.8444	54.1654	68.07	0.0216643	0.199253	1	1
102251	80.1921	43.2879	62.8557	75.2721	64.7439	49.5491	55.4176	41.9637	52.8227	44.8916	54.3019	49.426	55.715	85.4436	40.2397	51.6706	59.2355	62.4714	0.690716	0.874744	1	1
103251	54.9949	68.9543	69.0645	57.2839	53.817	50.0117	54.7592	39.4189	63.0478	63.1476	40.638	47.4218	57.246	55.0533	46.9031	41.8889	51.4811	69.1185	0.352278	0.687381	1	1
103751	39.2291	57.0931	52.4923	32.242	59.0994	36.7477	54.78	51.6699	47.0144	53.8023	38.9383	44.4077	51.9739	32.298	64.9691	52.5254	44.9059	50.964	0.914429	0.971666	1	1
104251	35.8022	42.5087	49.699	20.6032	33.3713	28.5545	38.6252	54.5436	36.321	53.5878	23.8784	17.1843	26.9531	30.9862	54.8833	35.2938	53.9721	35.0058	0.883341	0.96626	0.972421	1
104751	60.4039	62.7444	81.5271	56.3328	66.6043	61.3223	66.131	72.3715	63.2013	65.7062	60.2255	37.4514	48.2623	65.0535	78.28	54.765	70.7769	47.9203	0.181145	0.512525	1	1
105251	53.7798	61.8165	71.4172	51.6288	52.1745	58.0773	61.0446	57.0751	64.5345	54.1754	70.5834	46.4755	60.5229	51.6747	61.2785	36.2307	69.7395	54.3051	0.494939	0.786129	1	1
105751	25.3986	31.39	21.18	24.5795	15.5806	23.2159	24.3043	32.7633	18.8436	31.8904	42.2846	23.5333	45.1179	41.7473	37.1359	31.899	25.3412	46.3522	0.00246406	0.067572	1	1
106251	36.9313	32.6436	36.2435	56.2662	35.1703	44.9761	64.2393	49.6216	37.6974	39.0903	57.6431	42.6988	51.6118	61.4444	55.8167	68.0211	53.5362	43.0059	0.180864	0.512525	0.678655	1
106751	40.7241	38.2356	31.0074	48.5048	52.233	22.8172	54.8286	45.6691	53.934	37.6778	39.7599	44.219	48.5999	57.0069	65.6823	60.7821	43.9746	42.9245	0.417839	0.734841	0.277151	1
107251	35.8991	31.1849	36.8297	39.3631	35.1069	12.6021	25.4596	40.0047	31.4227	49.3636	35.5809	24.964	28.843	49.4816	26.6557	42.2916	42.4115	27.9324	0.324383	0.674301	1	1
107751	30.69	26.9489	31.7902	12.6001	32.6879	22.5486	21.9934	34.5867	31.2043	52.1451	34.3042	-4.82763	33.3893	23.9505	34.6433	29.6833	62.5254	27.4883	0.432467	0.74842	1	1
108251	35.9038	65.1365	73.2296	30.0878	70.1323	44.4547	49.9058	63.2425	51.0159	55.1368	65.0469	37.8928	73.8806	47.2354	53.8486	41.8947	68.3968	62.1112	0.708273	0.881585	1	1
108751	-15.983	1.19085	-4.99032	3.54612	12.1446	-2.626	0.263645	5.07406	-1.94726	-1.30644	14.8806	1.92373	2.58206	-8.08975	-13.3635	-9.91574	-1.0974	0.643452	0.818937	0.944614	0.401148	1
109251	-13.1877	-12.4546	0.924303	-12.6206	1.71249	0.672948	5.81615	-8.2481	-12.7999	-7.05908	6.27116	-13.1335	-9.8033	-8.22128	1.72442	-4.71272	-10.4239	-2.39555	0.936011	0.980181	1	1
109751	-15.2938	-16.7772	-15.1454	-14.8468	-13.4854	-16.9709	-13.727	-29.2258	-21.2265	-6.97358	-5.88002	-21.6101	-22.0626	-16.8625	-11.4408	-11.3641	-24.8732	-15.0174	0.426674	0.740192	1	1
110251	-4.55575	-4.9484	-11.1066	-7.13925	0.116266	-3.75167	-7.88142	-2.60221	1.91994	-7.48216	6.71213	3.01121	-13.7372	-1.52875	-19.4855	-6.34952	-14.9805	4.25548	0.790439	0.924319	0.699305	1
110751	2.64683	9.68322	-3.82312	14.1564	10.2207	11.4364	3.7157	1.58649	4.31277	12.3126	15.1205	31.2875	-4.19522	0.104903	4.61306	0.691202	11.9836	12.0962	0.627229	0.851446	0.0311417	1
111251	-0.873269	-1.05842	6.16672	0.296751	-3.84345	7.00175	-1.34453	-6.11599	-7.5659	-10.322	-9.95727	4.8389	-14.3828	-6.18145	-6.67188	-7.78857	-5.4476	-2.445	0.0831352	0.374324	0.978034	1
111751	8.36839	9.70251	15.4594	20.6033	1.29703	25.7661	1.8517	16.9431	7.67321	0.834102	5.97125	-0.352233	6.97224	8.63024	-2.35784	-12.4006	-18.4944	15.2741	0.0206631	0.196437	1	1
112251	-29.8156	-29.8068	-33.7348	-15.9456	-38.8298	-23.5761	-18.3455	-25.4616	-28.6761	-22.0622	-17.9887	-34.5136	-29.3339	-27.7894	-8.18409	-25.2925	-44.3866	-17.3183	0.657529	0.860217	1	1
112751	-6.75976	-25.9776	-24.3142	-3.75866	-24.9045	-6.7976	-20.348	-15.9322	-20.1653	-24.9925	-6.97751	-20.3741	-17.3	-18.8474	6.45406	-16.25	-2.16505	-11.8636	0.368546	0.700729	1	1
113251	49.383	29.239	48.1017	47.7486	38.5301	52.0444	48.2705	37.1774	35.0454	5.20931	48.4867	9.9734	12.8756	14.1926	29.654	10.4597	37.9704	24.3637	0.00143736	0.0512356	1	1
113751	-9.79317	-5.63747	4.12618	8.74477	8.40253	-1.4277	16.0416	0.573067	-1.32749	-11.8916	2.09641	-24.1015	-15.2681	-10.7783	-8.56552	-18.8773	-15.2245	-18.8369	0.000565762	0.0336157	1	1
114251	-13.1294	4.4247	-12.9552	10.5197	-9.05517	-47.0422	-11.4639	-8.95145	-15.8207	-19.3809	-3.4584	-39.261	-11.7432	-14.1283	-21.6324	-13.1448	-25.346	-13.6633	0.320003	0.668124	1	1
114751	5.45518	15.0566	-3.88151	29.6202	8.50106	-25.392	12.1914	-7.23302	-7.2556	8.18924	21.8539	9.92561	-9.80912	-9.90302	-6.26756	9.48877	-10.2217	-11.3291	0.708769	0.881585	0.900769	1
115251	34.4164	30.952	29.4785	27.9741	30.5306	18.6466	28.4004	8.30138	29.0877	43.3346	55.3129	28.9861	27.1613	21.1551	25.4904	22.4151	33.4863	4.89968	0.731352	0.892901	0.221013	1
115751	-17.1172	-23.3356	-17.4889	-3.62715	-17.023	-38.1448	-24.7929	-8.23513	-16.2746	-22.3018	8.72432	-15.4868	-31.5126	-33.4038	-6.70526	-19.6674	-13.498	-35.0866	0.956037	0.990452	1	1
116251	0.606497	-5.24097	-8.29844	-10.7445	2.29266	-6.56264	-10.9669	-7.76277	-8.72783	-7.91398	14.1749	7.76072	-28.7177	-9.5418	0.767525	-17.2413	-16.7219	-7.3879	0.872936	0.962726	0.291377	1
116751	12.6626	-14.5203	18.7168	-5.74931	-1.71617	2.70476	9.9451	-38.3905	-9.25573	6.85711	7.9626	10.797	-10.2982	-24.7983	-19.1974	4.54717	8.03603	-2.22425	0.937684	0.980181	0.224734	1
117251	10.2673	-19.1664	16.2185	15.5772	6.29931	1.83009	3.14933	-8.38936	-15.8736	14.4393	7.98911	4.62283	5.80283	-7.99463	-19.9793	9.27115	34.5142	12.9149	0.550705	0.81222	0.255488	1
117751	-5.02164	-13.2411	0.629168	10.6111	5.81911	0.369778	-2.96534	14.5774	-0.592923	10.989	27.6117	8.02575	17.4226	0.191152	8.31028	10.4203	-2.89151	12.6574	0.108012	0.426929	0.769735	1
118251	-33.8038	-51.9302	-41.0288	-46.5259	-39.6011	-29.3443	-35.3593	-35.7642	-40.2019	-29.776	-10.8305	-3.91047	-31.0433	-31.3142	0.37705	-10.999	-34.0024	-25.9145	0.00120221	0.0512356	1	1
118751	-15.7591	-38.1084	-18.4693	-26.2263	-22.4262	-12.8361	-18.9926	-24.8383	-22.6489	-32.975	-10.559	-17.1359	-19.2518	-17.1361	-3.42665	-11.8442	-26.0627	-17.1561	0.205815	0.54916	1	1
119251	-15.9097	-9.53237	-16.7215	-13.3478	7.49131	-2.37491	-18.7807	11.3766	-5.48063	-11.5987	15.2871	-4.58917	-11.2512	-6.38263	-4.73233	-4.49285	-1.22178	-8.04011	0.523958	0.807037	1	1
119751	-14.7318	5.98284	-12.8448	-0.887883	2.60986	5.14067	-0.106272	-1.18623	-10.4009	-11.291	20.9025	13.9585	-14.4573	-6.52424	-2.34395	7.38096	-5.26939	-7.16151	0.67564	0.867931	0.691982	1
120251	-11.0838	7.71504	-4.4442	8.17301	-2.17959	-5.16276	-5.96287	2.77491	-10.5652	-6.93325	16.7819	-0.173769	9.56454	-15.7828	17.0354	7.59077	-4.38401	-6.44591	0.361437	0.694289	1	1
120751	-21.1105	0.887184	-2.85533	15.1374	-2.0198	-8.15452	-10.2093	-7.95458	-23.8857	-20.0868	4.85297	-15.409	0.959791	-15.5143	26.9483	15.1139	-12.6554	-9.14221	0.560714	0.81222	1	1
121251	-30.8629	7.53288	-40.9473	13.2871	-5.01713	-11.5549	2.10457	2.24571	-27.5363	-10.7094	-4.48115	-17.218	-4.198	2.12863	10.7517	20.0786	-23.0655	-13.3296	0.48039	0.776667	1	1
121751	-15.4758	-8.54216	-43.5688	-14.4819	-10.5651	-11.3863	-10.8573	-9.63923	1.99311	4.29601	-16.5445	-5.96547	-20.1493	-14.5292	-10.111	4.24996	-18.2294	-27.5295	0.735912	0.893003	0.967061	1
122251	-3.78917	-14.4705	-30.6838	-4.05823	-13.2945	8.6643	-3.54637	6.82007	13.3075	6.29139	-3.32159	4.70348	-15.3021	-13.9873	1.58848	-10.6663	-14.7295	-12.3859	0.824053	0.944614	0.109746	1
122751	-2.0351	-23.4757	-10.9955	2.89187	2.84498	0.0357225	-7.00878	-6.62207	3.57077	-5.71836	4.964	12.1348	-11.76	3.13329	0.563096	5.46894	2.61013	13.3245	0.220735	0.56869	0.34885	1
123251	-25.1144	-19.9011	-30.7935	-20.7974	-21.3046	-14.9247	-32.5235	-27.8273	-29.404	-16.5981	3.14101	-5.64434	-5.36134	-17.3139	4.50301	0.695981	-0.776581	0.297347	0.00556124	0.116623	0.631868	1
123751	-34.0709	-14.3722	-39.8989	-5.69986	-28.7314	1.31555	-10.7952	-15.4799	-18.1399	-22.462	-1.55569	-1.81369	-3.14626	-24.0116	-4.22518	-7.20942	3.37472	-34.4335	0.227617	0.56869	1	1
124251	-16.9085	-24.4237	-35.9302	-28.1436	-26.1175	-13.9545	-15.9147	-27.774	-7.91253	-27.2086	-1.70417	-10.1329	-28.0156	-32.1021	-19.5732	-23.0474	-23.5208	-21.2525	0.817262	0.944614	0.733101	1
125251	-15.4107	-16.3007	-33.1873	-13.0156	-21.1708	-15.2646	-31.6716	-27.6917	-20.7415	6.63433	-10.3514	-2.38215	-14.3106	-2.12254	-4.13845	-11.9808	-8.24768	-22.4134	0.0392862	0.270962	0.448909	1
125751	37.4903	32.0368	-3.77874	8.14267	5.36104	17.4767	3.14907	20.4913	21.1282	20.202	5.39283	5.73521	13.3947	29.7674	0.401447	11.6973	15.1251	14.4486	0.610131	0.84617	1	1
126251	-10.061	-13.9744	-12.5493	-20.9573	-2.63795	-7.72402	-21.7177	-23.0667	2.06804	-26.004	-10.2908	-9.11667	-13.6729	-15.2307	-15.1834	-18.8198	-2.87184	-16.9561	0.598919	0.840609	1	1
126751	-36.8048	-20.2549	-22.1346	-19.761	-23.7023	-19.2382	-29.4991	-19.4385	-23.0246	-24.0567	-3.73752	-10.4851	-25.9012	-30.1716	-8.5447	-16.7692	-15.3262	-19.1521	0.0749138	0.360902	1	1
127251	-20.3956	-13.7963	-26.1659	-16.5328	-18.0172	-13.0242	-28.491	-18.1931	-25.1941	-30.9561	-5.90313	-13.8313	-20.752	-29.784	-15.0322	-13.9424	-12.7951	-27.5033	0.768054	0.908163	1	1
127751	-27.705	-35.9777	-35.1126	-12.8076	-21.5708	-39.5329	-26.9446	-17.8183	-22.7657	-15.3548	-16.2838	-27.8646	-26.292	-15.6624	-12.5268	-21.4374	-13.6287	-23.709	0.0497523	0.299196	1	1
128251	-59.5428	-68.9974	-57.6215	-43.7888	-48.8599	-73.714	-51.9226	-57.317	-43.4136	-38.1468	-39.8241	-43.7354	-56.2801	-45.654	-16.6496	-24.8392	-37.1937	-50.7791	0.00630562	0.120308	1	1
128751	12.2039	18.982	21.6362	22.6495	20.5701	33.7818	37.9523	22.2344	13.128	31.2409	3.01306	2.78182	2.34493	3.03351	3.36668	-3.05761	19.4743	25.0266	0.0192969	0.196437	1	1
129251	25.3242	23.1008	29.9792	37.7151	43.3949	39.8517	39.0687	25.1438	19.0811	31.399	12.1685	9.56853	9.94168	6.17976	-1.54695	-4.40404	33.4636	18.7885	0.0368292	0.259993	0.627325	1
130751	-4.1188	-1.35432	-2.16595	-4.2358	1.07032	13.5535	-3.63083	-6.42742	5.80797	-1.42017	-3.41156	1.80725	4.04715	-0.779756	4.77731	10.5688	0.471093	1.6418	0.406391	0.731822	1	1
131251	6.21024	10.9278	18.4382	14.2721	22.2929	27.5127	31.9717	12.9848	17.7291	26.897	33.6205	23.6955	16.4227	-4.35324	20.048	18.497	7.78661	15.1945	0.938939	0.980181	0.228466	1
131751	-16.4371	-27.9097	-11.811	-16.7281	-18.7723	-4.53584	4.67845	2.96933	-17.3918	-16.856	17.7325	11.0021	-5.33623	-18.776	-4.33277	-17.1331	-14.2106	-9.82535	0.486738	0.7794	0.407126	1
132251	28.392	-0.728715	28.517	19.7589	27.922	22.7943	11.8844	9.86299	7.63517	4.47707	12.0567	18.5894	12.8507	37.3804	14.3705	20.1023	17.3693	4.43059	0.764566	0.907047	0.909547	1
132751	11.4226	-6.04709	-0.593535	-1.38741	7.98838	4.83734	-0.497502	1.93869	5.812	-12.2061	-2.94599	9.00166	3.99366	13.2681	6.64201	3.91298	-3.96758	8.07335	0.93708	0.980181	1	1
133251	10.6133	-9.75744	-2.02805	5.81726	7.70704	20.0965	-4.64345	1.23004	3.60381	-9.55933	7.61157	3.59419	12.6166	-0.480887	8.3318	-6.86391	7.91946	7.58205	0.962669	0.990452	0.774067	1
133751	12.4368	-13.3396	-15.2539	-10.4171	-15.253	10.7462	5.46107	-18.2491	-10.1576	2.88821	-3.01868	-9.0018	10.1314	-13.1438	-3.92026	-1.26438	-11.268	-9.3096	0.709719	0.881585	1	1
134251	16.9483	20.7096	11.364	16.4643	2.26804	34.3865	21.2175	-3.88396	15.7758	2.02567	24.4206	8.65419	11.4166	16.2591	3.4838	7.06409	3.02346	-2.61795	0.157497	0.490374	1	1
134751	-10.8706	15.5115	20.9494	30.0723	15.039	14.1501	19.6647	25.0691	21.1602	6.6891	12.8142	1.82477	3.53224	14.2992	17.9842	3.6464	15.4096	5.31414	0.156241	0.490374	0.960751	1
135251	-6.34338	-9.73294	2.57957	-3.84749	5.94691	4.45347	15.0411	11.6579	15.1061	4.43304	9.9511	3.58694	-7.4988	14.2016	12.2648	5.31411	-14.9791	-5.44696	0.835946	0.950644	0.0968215	1
135751	2.3542	-17.6073	-5.65695	6.6712	6.38832	-0.29546	-5.08883	0.481578	16.255	0.956829	14.5124	3.76625	-3.33685	0.190244	1.35031	6.39083	-15.9399	-6.4222	0.966234	0.991379	0.544339	1
136251	-8.50931	-11.3881	3.52892	7.84261	-4.87864	8.11689	-9.58935	-4.24626	10.2034	-11.8777	13.7937	16.0262	-10.8177	2.8692	-3.69463	12.4143	-11.8925	0.0764437	0.713182	0.883748	1	1
136751	0.951452	-3.81169	17.4378	2.76938	5.70048	8.4585	3.3033	23.893	3.12647	-4.26365	2.76183	17.4731	-6.33362	6.04985	-18.1482	12.7436	1.7602	0.979544	0.249518	0.597	1	1
137251	27.7387	6.01226	7.08942	33.0334	11.2417	42.0558	31.3555	43.9764	24.4194	22.6252	30.1428	33.3279	22.5621	10.4208	3.2067	19.1819	29.5135	27.7601	0.709561	0.881585	0.226917	1
137751	25.7494	13.5915	26.4974	40.2403	20.631	34.8651	29.6357	29.8071	13.8672	28.6551	22.4312	26.8638	20.1062	18.0242	20.4832	23.9194	25.7646	27.2731	0.551442	0.81222	0.65813	1
138251	-16.4985	-11.9608	-8.29833	-6.52356	7.4102	-1.44252	6.78368	-18.0546	-13.7127	-5.7358	-25.353	11.029	-2.26621	-9.92628	-6.74874	6.64485	-6.22444	-22.0382	0.970867	0.994581	1	1
138751	-31.0531	-48.0016	-39.5169	-48.2052	-31.0107	-37.5197	-28.068	-81.8035	-43.2617	-35.4888	-17.9595	-20.0106	-34.4207	-56.8225	-32.073	-14.379	-29.6031	-45.7817	0.128402	0.462635	1	1
139251	-32.2328	-34.3573	-39.835	-25.8378	-41.9907	-27.8035	-39.9168	-35.4314	-28.574	-41.0692	-30.2236	-7.74075	-33.4369	-36.6868	-16.3717	-7.19717	-32.7059	-22.1872	0.0764675	0.365915	1	1
139751	7.90892	-0.103591	-4.49991	4.21683	6.52625	-11.0577	-1.439	3.70853	-9.37866	-16.0278	-6.82446	6.51142	-9.23569	-8.13145	-7.57703	-0.295999	-20.1061	9.03434	0.18666	0.515846	1	1
140251	2.38656	-29.1722	-22.5881	-7.71437	-11.0899	-9.40422	-8.36828	-3.94991	-6.63056	-17.1237	-15.0575	-26.287	-18.6196	-18.8372	-20.7619	-10.1611	-21.9153	-1.0995	0.222104	0.56869	0.948226	1
140751	25.3239	-6.65531	1.91529	14.3957	22.6701	30.9884	13.8832	23.0343	16.6376	26.8166	-3.95951	-14.8662	-5.75556	16.0502	2.63622	7.10887	23.906	5.98879	0.143198	0.472502	1	1
141251	-3.18502	-33.2234	-1.50825	-7.73629	-4.82395	2.95398	-8.04267	-6.50768	-8.08596	6.284	-8.14883	-6.77967	-11.2609	-9.06867	-20.7784	-18.2558	4.13116	-13.2201	0.867597	0.962726	1	1
141751	-44.647	-45.5696	-34.6635	-37.6521	-33.4478	-36.0772	-27.4158	-42.7344	-32.0213	-32.0253	-31.5858	-45.49	-53.295	-40.3453	-32.4127	-30.6477	-19.88	-39.5316	0.821434	0.944614	0.780836	1
142251	-22.8143	-27.435	-34.863	-27.3045	-17.7001	-34.369	-11.9248	-35.9051	-9.27046	-27.9355	-32.6842	-48.3305	-34.3471	-28.9873	-27.9699	-9.57258	-18.4099	-31.2079	0.496394	0.786129	0.601711	1
142751	-25.4109	-38.7248	-45.1195	-16.2861	-14.393	-22.4372	-15.3025	-30.645	-15.6514	-20.3835	-27.1277	-32.4341	-13.3686	-22.5505	-11.0242	-16.5604	-11.5026	-29.7713	0.548501	0.81222	0.109938	1
143251	-38.0896	-46.1835	-50.8096	-31.4717	-39.266	-37.8069	-28.5743	-28.5609	-30.6198	-41.6589	-45.9998	-34.7612	-30.4458	-32.2268	-20.9768	-37.7866	-28.2894	-37.0439	0.697243	0.875482	0.0160278	1
143751	-33.357	-32.6898	-22.9396	-25.2471	-19.7993	-7.35529	-17.2794	-30.8776	-9.24539	-15.0065	-47.3379	-45.9273	-35.3245	-22.8128	-9.94242	-27.2488	-29.1035	-29.4773	0.265137	0.619813	0.916538	1
144251	-1.50602	-0.288792	-10.9786	-10.2901	-16.7173	3.59571	-16.4154	10.2844	-2.82939	-11.5375	-8.09587	-35.3003	-38.3265	-21.8548	10.6756	-6.41481	-6.1425	-7.12326	0.163665	0.496567	1	1
144751	0.415592	-21.6853	-22.7163	-20.8128	-21.7842	-22.227	-14.4376	-4.87429	-9.95216	-26.1073	-8.73338	-23.9137	-37.8972	-25.9064	6.34046	-13.1265	-15.0757	-14.0717	0.663435	0.86162	1	1
145251	2.88983	-0.809783	6.10788	-2.97055	3.63168	-15.5496	11.8247	6.22049	9.41977	-13.4944	1.45247	-27.1555	-13.8472	-7.6631	0.0450578	-10.4328	0.089645	-18.2188	0.0508412	0.302081	0.845694	1
145751	-14.9734	-18.1113	12.0498	16.1517	9.80483	3.78376	-14.6619	5.78455	5.59727	-3.76989	-2.5064	-19.337	-11.5162	-13.0763	-20.0494	-5.60483	3.65303	-14.2563	0.147138	0.476008	0.695943	1
146251	-8.1742	10.0644	23.5491	8.05385	21.204	21.0872	-0.165928	4.70787	10.2214	-8.05579	-3.94368	-22.2538	-10.6346	-6.40284	-11.2443	-2.04038	8.23701	0.7854	0.0429032	0.283241	0.458701	1
146751	24.0286	16.8181	19.2326	7.10351	2.73191	19.6585	4.54605	7.23388	11.0751	-13.375	-2.4819	-15.1011	-1.7438	8.95559	9.52075	1.04311	-1.73807	16.759	0.131825	0.462635	0.0666783	1
147251	-29.1521	-38.7667	-34.62	-42.4361	-19.3893	-30.0028	-38.9336	-27.9727	-27.3748	-28.253	-34.2405	-33.3019	-44.4562	-26.088	-22.1798	-14.0181	-26.2356	-11.4134	0.330293	0.67521	0.58128	1
147751	27.7173	28.5263	32.3732	9.73989	32.4555	27.5472	15.8684	26.2921	30.8066	14.9945	18.2762	1.04487	1.31171	11.0926	-1.71375	26.6686	21.6533	33.105	0.180711	0.512525	0.0766226	1
148251	-27.8657	-11.0816	-7.5087	-13.3456	2.33849	-11.7001	-6.48885	-2.6641	-9.75393	-18.1291	-14.4798	-23.3825	-14.4193	-0.987278	-17.2476	-14.8497	-10.9509	-19.1826	0.237489	0.580165	0.878618	1
148751	-34.1344	-21.0201	-6.53054	-15.8414	-13.5146	-15.3547	-22.1185	-16.4283	-18.501	-28.4131	-14.384	-14.9993	-23.8573	-0.40493	6.73401	-17.432	-25.3866	-23.9447	0.678752	0.867931	0.656997	1
149251	10.8369	-4.75359	17.2131	4.69583	4.87425	2.30429	1.371	5.57253	-0.36866	-10.0828	-0.07446	-7.17058	-9.15669	7.17055	8.33997	-0.553999	-11.7091	2.84034	0.0526997	0.310536	1	1
149751	-27.0355	-36.5459	-13.9239	-21.5205	-29.6191	-27.0201	-32.7331	-27.1932	-13.3623	-36.9814	-35.3106	-33.6626	-36.9455	-19.9765	-17.7526	-15.8622	-39.4912	-32.3561	0.295779	0.644072	1	1
150251	-25.3917	-26.3874	6.12695	-6.80274	-7.53996	5.31253	-7.15145	-3.41596	15.0558	-23.7363	-2.47643	-17.4378	-11.3444	0.988113	-9.2952	-0.426913	-18.1875	-1.11895	0.554091	0.81222	0.92348	1
150751	16.0472	-5.69732	10.681	2.4942	12.3733	9.56754	-1.86483	26.8566	21.47	-3.11717	3.17144	-34.2727	-3.90585	2.36124	-7.28369	-0.920168	-6.27091	5.2128	0.0109156	0.146845	1	1
151251	10.5298	-7.36434	5.81528	-9.87029	-3.02618	-1.66569	-7.95775	-4.70439	6.11467	-12.6375	-15.4367	-25.1835	-5.54351	-4.40419	-6.44201	-9.51451	-21.7008	-19.0452	0.0585744	0.328847	0.280549	1
151751	-19.0779	-18.6681	-8.18631	-12.5019	-1.38913	-14.0559	-20.7684	-24.8533	-14.4993	-17.3974	-10.7711	-16.585	-30.601	-0.469366	1.43069	-15.0904	-21.2275	-25.6906	0.954532	0.990452	0.911561	1
152251	-14.9387	-22.1326	-8.7167	-10.3436	-2.24851	-8.99505	0.352148	-20.0051	-16.1759	-13.9711	-21.9598	-18.7395	-18.6513	-6.32728	4.75142	-10.1337	-7.22393	-22.0706	0.776212	0.911761	0.883526	1
152751	14.7352	5.61776	12.9746	15.7112	18.0926	23.8461	17.968	18.1862	-2.48746	12.8824	-17.305	1.78289	-13.4936	-0.496496	-3.29582	-1.04011	-12.1362	-2.79636	0.000421515	0.030054	1	1
153251	-1.31489	0.282805	8.08714	0.654139	1.6846	-15.4404	5.0948	4.53712	-29.7369	-8.09901	-28.1397	-15.2717	-23.0053	-16.8646	-14.1722	-8.04642	-40.6443	-2.04545	0.0204735	0.196437	1	1
153751	10.6552	-4.74832	-0.109954	5.3862	9.22032	5.22154	13.0702	1.42758	3.84397	-4.43817	-1.80156	-2.99575	2.43915	-0.242756	-7.50269	0.737832	-4.22291	3.7548	0.0100769	0.140878	1	1
154251	-0.430633	-4.26557	1.03586	-16.3167	-1.79124	4.48651	-2.45507	12.3765	-0.300361	-6.83549	-7.7093	-13.1629	-18.878	-6.92902	-10.4047	-14.0557	-7.10017	-4.7717	0.0069838	0.127678	1	1
154751	-11.6285	-22.8507	-27.8292	-29.5266	-6.03052	-3.5415	-6.9877	-6.14904	7.20547	-10.0196	-19.5702	-9.23693	-39.9826	-24.1181	-19.3912	-27.0154	-19.3188	-3.96746	0.361513	0.694289	0.323248	1
155251	-22.4869	-26.1264	-25.3236	-16.0392	-5.05399	0.031213	-17.7844	-2.46586	9.59497	-17.8692	-15.8761	-14.532	-32.8461	-10.2011	-16.3187	-1.5849	-13.6694	-14.6535	0.645245	0.856789	0.14362	1
155751	-9.07133	-20.3752	4.48637	3.21265	-6.5949	14.3133	1.53387	8.20315	10.0208	-20.1303	-25.4549	-18.0684	-4.32492	-7.91206	14.2365	3.30624	-22.8082	-10.2894	0.238052	0.580165	0.196046	1
156251	-0.773473	-4.65313	8.22537	17.6301	-0.947662	11.2286	-3.46225	15.3998	19.2066	-5.31556	-1.73697	0.578046	-5.17032	4.92195	18.1098	-9.55369	-12.2523	1.47893	0.174529	0.512525	0.753785	1
156751	26.8974	-12.6076	28.8479	3.97732	14.9358	35.4005	10.3439	18.7845	28.2226	-9.52349	-7.5263	-13.8029	-4.91003	-7.16302	-2.17771	-16.9067	-9.81917	-6.1997	0.000143317	0.0145979	1	1
157251	-1.34125	-9.87034	16.4903	6.13971	-0.791185	23.5703	11.4263	8.17061	11.5687	-12.3645	-11.9357	-13.3895	-8.80551	-10.6742	-5.30701	-13.7265	-12.8128	-8.87115	9.09365e-05	0.011301	1	1
157751	-16.6563	3.76378	1.16737	-15.2564	-7.7339	9.07433	6.10487	-13.8429	7.04884	-0.639298	-18.1149	-8.3454	-22.4799	-11.8261	-16.8245	-27.4748	-25.8732	-16.7354	0.00823817	0.13137	1	1
158251	-22.7155	-38.611	-31.1854	-28.4805	-11.9243	-16.4406	-20.8389	-29.9288	-19.6848	-28.521	-42.4151	-28.2533	-19.2477	-36.2918	-25.9585	-26.7483	-34.3849	-17.3609	0.343803	0.682639	0.835905	1
158751	9.61412	3.27457	20.6294	18.1608	22.752	24.5752	16.2756	22.9661	16.097	2.20582	-2.76908	-0.781005	3.64389	10.8979	13.2073	2.4011	17.4516	20.2185	0.131478	0.462635	0.127198	1
159251	11.6591	-7.09127	21.4516	9.88018	-4.16466	9.75999	2.59202	7.45452	11.7386	-16.1596	-17.0502	-13.8033	-17.5195	14.3151	19.698	-15.8965	-4.76003	-6.0683	0.101667	0.413243	0.634398	1
159751	40.2462	7.09605	43.5484	16.0035	25.1566	34.9847	25.9543	11.0464	23.1165	0.579316	8.84357	3.79334	9.25392	16.8837	20.9975	5.99874	17.3673	12.5971	0.00779872	0.129314	1	1
160251	-8.92661	-1.88692	34.8911	7.26951	18.0417	3.02081	25.22	-3.39783	20.0128	0.979587	-5.25079	12.4051	13.2776	3.37607	3.50017	5.44841	-0.302073	9.608	0.301923	0.644886	1	1
160751	-31.912	1.78885	11.8797	1.56912	4.71162	-10.959	2.22264	-23.7099	-1.51526	-4.61144	-15.7644	-0.998266	-8.21494	-9.54475	-7.91754	-28.2907	-30.9194	0.426452	0.288471	0.636779	1	1
161251	-12.6879	-3.04436	18.2219	-9.98527	3.39928	0.0727762	7.71043	-10.2313	10.4635	3.97141	16.6995	-4.28837	12.0592	-17.8639	5.79514	-7.77684	-5.10064	7.93538	0.870639	0.962726	1	1
161751	8.37489	5.58321	9.6938	-2.24905	14.6969	24.0557	1.89788	-2.03369	19.1153	13.0472	10.1617	0.247122	15.8637	-3.44883	4.92812	2.55491	11.1098	17.8158	0.847983	0.957999	1	1
162251	-19.4476	-31.6248	-36.595	-38.6015	-28.2146	-20.9515	-40.347	-31.3267	-26.573	-24.6431	-39.4505	-24.0496	-31.7009	-37.3843	-19.9222	-7.98943	-30.8751	-29.3102	0.44511	0.755627	1	1
162751	-63.5863	-75.5732	-59.7766	-73.3704	-57.8949	-63.1167	-59.8771	-70.7029	-60.1542	-51.8133	-51.9309	-39.7284	-74.9479	-65.3721	-31.4605	-39.0088	-60.3782	-73.1384	0.0747598	0.360902	1	1
163251	-43.6886	-47.7822	-48.4816	-31.6749	-29.6149	-31.0265	-33.6362	-55.2498	-25.7174	-24.2906	-21.8372	-9.30617	-47.3123	-46.0594	-19.4104	-8.83907	-44.2512	-41.78	0.269832	0.626678	0.601337	1
163751	-30.6963	-17.7611	-20.3066	-17.5929	-10.0324	-18.1683	-14.5323	-24.6765	-8.48346	-1.83154	4.18425	-2.62174	-24.7064	-28.5467	-15.1329	-8.86031	-14.8054	-9.32012	0.390525	0.71822	0.0125224	1
164251	-63.1519	-50.2724	-37.3726	-35.7712	-43.449	-38.9368	-28.7184	-31.8459	-32.412	-24.4162	-10.7411	-18.371	-52.3911	-20.7141	-5.59573	-2.8679	-37.5524	-28.9035	0.0129483	0.167471	1	1
166251	-3.09505	-7.12895	24.2233	-0.509983	21.4712	-1.45842	15.325	2.7722	-6.98553	-11.4877	14	2.60744	8.07191	-10.4504	-29.4282	-12.5199	-3.55201	4.36805	0.142978	0.472502	1	1
166751	-0.594736	-4.06552	0.613397	4.8033	1.53277	1.29996	4.11377	-13.0506	-3.11476	-19.3629	9.37603	-8.32045	-2.55471	-13.2931	-19.5041	1.00102	-18.8543	-0.475801	0.0911179	0.391227	1	1
167251	26.7501	31.4198	24.8286	17.5636	26.6778	41.1394	29.9698	8.00487	28.2613	9.91516	15.2789	21.1303	28.24	14.5195	25.1025	22.343	29.9567	30.138	0.35422	0.688172	0.921078	1
167751	-17.3425	-20.338	-10.9774	-5.11247	-8.39934	16.6774	-15.4329	-16.1288	9.33117	-16.002	-12.8981	1.69472	-10.5727	-2.3248	-21.4795	-7.42527	-14.6059	-7.1309	0.638335	0.856789	0.899186	1
168251	-15.9599	-6.04312	14.0507	16.6631	-7.60713	3.89612	-3.21143	3.65471	-0.818295	2.41658	-10.2031	1.95495	-0.00299524	-1.10937	-9.68631	3.73164	-0.063519	-2.6536	0.566694	0.813663	1	1
168751	-10.4149	9.34553	11.7003	21.2163	4.00897	-5.03955	2.4809	7.0933	1.97953	4.3334	-0.923066	8.83338	-9.2531	4.83674	8.6501	2.42242	-2.91213	-1.19588	0.413296	0.734841	1	1
169251	-14.5017	-2.78844	-24.401	3.91226	-4.25096	-8.24847	-15.1095	-10.992	-9.40519	-5.76333	6.19157	9.95719	-12.7294	-0.999887	9.6638	4.05709	-16.1575	-7.18495	0.141833	0.472502	0.85985	1
169751	-6.80841	7.64867	-10.8473	-1.93578	2.93679	4.23	-6.17165	18.2657	7.89884	-1.19231	10.9416	8.49135	3.19382	-1.97744	9.74746	21.2985	-2.3967	-5.85766	0.482933	0.776667	1	1
170251	3.55198	3.34621	2.01444	-13.3931	3.8417	31.5587	21.4216	10.1874	24.4696	5.66948	2.44613	2.29171	-2.21755	-6.22984	3.76758	21.1332	-4.3055	8.05374	0.316765	0.664275	0.938934	1
170751	-5.88402	-2.16879	-0.911562	-0.394066	-8.9803	0.839708	-7.3694	6.57439	20.4536	-6.52852	7.24813	5.74371	0.409451	-5.75984	2.76958	16.2462	-6.7555	8.09974	0.595524	0.839148	1	1
171251	-29.9963	-19.8631	-18.8571	-17.6244	-18.2966	-18.1951	-32.0723	-28.7123	-0.238594	-17.0767	-0.537313	-1.39676	-12.9677	-11.3658	-11.3966	-8.6247	-31.1545	-3.33156	0.0481882	0.296191	1	1
171751	-6.21942	-21.1871	-19.1675	-19.8534	-16.1576	-7.61666	-14.2275	-32.4833	10.241	-5.35414	5.23501	0.386663	-0.350335	-1.54393	-12.371	-3.01702	-11.1696	17.5363	0.0198715	0.196437	1	1
172251	13.8939	0.251409	1.58209	-8.80317	-1.14875	7.11729	-2.493	-14.9985	9.73934	-1.78477	-2.91446	11.0654	-4.84069	0.843547	-0.176034	-0.927999	9.87189	15.9433	0.537491	0.811386	1	1
172751	-22.7204	-26.8657	-37.8888	-34.8906	-15.6645	-25.627	-24.7475	-24.705	-13.7981	-29.0942	-30.6425	-12.3984	-32.7319	-19.046	-53.0709	-31.4041	-12.7307	-12.8154	0.889123	0.970819	0.944231	1
173251	-21.3409	-10.3644	-34.7201	-17.1813	-2.35572	-1.81522	-30.9466	0.896737	-3.36246	-17.2856	-6.30254	3.02863	-0.884841	-11.0169	-24.6079	1.01716	-1.59364	-0.671617	0.282581	0.636779	0.896253	1
173751	2.82407	-6.67992	-11.3307	0.544995	2.22742	18.2367	-2.83302	1.10285	19.7434	-6.90568	8.10726	13.0017	3.58286	-3.16197	21.2681	-3.33255	9.98187	19.886	0.388618	0.717836	1	1
174251	5.21052	7.25411	-11.4579	-1.31751	-13.6851	6.85292	-3.4271	9.59482	6.21674	-1.42139	6.19442	-5.30864	-5.12548	8.35646	8.72839	-7.51421	5.79081	12.4309	0.62441	0.851252	1	1
174751	-9.08697	-17.4891	-23.1978	-15.6859	-16.6611	-1.59843	-33.1676	-6.47634	-11.1677	-21.6389	-19.0888	-21.4276	-16.5307	-11.7695	10.2163	-11.9477	-9.33264	3.6823	0.480712	0.776667	0.788933	1
175251	40.0367	27.7173	24.307	18.8824	27.515	25.9004	0.907325	25.323	19.3809	26.4118	20.3453	1.81758	5.13337	25.221	23.4546	1.07995	2.98728	19.121	0.162348	0.496567	0.763387	1
175751	-9.70055	-24.8487	-1.68824	-22.4686	-13.0445	-23.5405	-22.8897	-24.657	-0.716527	0.418355	-9.05517	-3.62393	-18.5156	-7.30615	-13.1512	-21.6974	-27.3008	-23.3625	0.738541	0.893003	0.228154	1
176251	-11.0168	-18.229	-13.1148	-14.4089	-12.1459	-14.7933	-14.7306	-31.2917	-4.13173	-19.2718	-10.6376	-9.89041	-7.93673	-14.2681	-22.5404	-21.7743	-2.41276	-3.35276	0.497359	0.786129	1	1
176751	-0.500418	-10.6541	-6.64154	-9.23541	-2.75162	-8.86166	-5.6855	-12.7943	0.295005	-7.47714	5.48901	-9.99134	2.62766	-28.5649	-13.938	-9.44602	0.741419	3.64635	0.998148	0.998148	1	1
177251	-64.7484	-73.7873	-61.1672	-66.0713	-58.9542	-61.7872	-50.3139	-56.9025	-50.5287	-66.6869	-55.8784	-56.454	-51.4282	-73.6343	-58.3714	-44.2388	-54.63	-61.4063	0.642	0.856789	0.379729	1
177751	-36.9213	-24.7417	-27.285	-23.7166	-13.358	-21.9076	-13.9467	-3.45797	-16.2991	-39.7512	-23.2967	-20.9434	-11.3106	-21.698	-6.87543	-15.3921	-8.65972	-16.001	0.798973	0.930829	0.0374803	1
178251	-24.8835	0.49103	-22.6984	-30.6395	-5.24034	-7.27764	-16.9979	-15.3798	2.36017	-31.455	-28.5541	-5.43728	-15.7407	-16.8818	-10.1205	-13.0543	-3.11695	-11.1319	0.740282	0.893003	1	1
178751	-25.795	-19.1694	-24.9638	-24.5433	-30.4092	-24.3826	-32.9904	-33.5963	-20.7225	-34.6516	-29.9444	-11.9653	-25.8092	-29.5459	-90.8273	-27.8249	-15.0966	-30.544	0.458659	0.760521	0.916041	1
179251	-56.6539	-70.7344	-57.2016	-47.5222	-64.223	-63.4868	-58.8744	-51.9769	-42.333	-54.6502	-52.2811	-50.696	-60.6431	-55.9141	-96.7357	-43.7929	-50.7414	-43.5195	0.958687	0.990452	0.252526	1
179751	-30.067	-26.401	-17.5762	-16.5	-33.8838	-6.31887	-24.1148	-26.2747	0.283872	-24.7373	-40.5683	-26.439	-23.9544	-26.0842	-23.1298	-24.1206	-21.3249	-14.1269	0.286308	0.636779	1	1
180251	-14.7456	-17.0129	-8.45644	-12.618	-20.2931	18.0716	-12.224	-7.72808	-6.2601	-14.7782	-19.5372	-0.15283	-17.6471	-14.5868	-9.47113	12.4328	-27.474	-7.83956	0.718243	0.884468	1	1
180751	-44.6462	-56.3733	-49.8321	-54.8758	-62.132	-34.4692	-66.6076	-58.8109	-46.8827	-45.0039	-22.5661	-48.0014	-50.2121	-51.3587	-35.897	-23.7145	-47.1245	-42.6982	0.0265387	0.22346	1	1
181251	-36.2708	-39.7387	-18.6408	-30.8301	-46.1718	-23.7739	-52.4155	-76.4246	-30.3463	-22.1875	-23.067	-36.2193	-28.3582	-51.2828	-45.916	-32.7668	-39.2275	-50.2609	0.752384	0.895575	0.477989	1
181751	-10.2516	-22.2144	-9.95339	-17.4312	-24.8675	-9.16687	-23.9863	-21.6908	-6.88357	-29.9567	-19.3776	-36.2775	-25.5201	-20.605	-25.5109	-17.1826	-24.5403	-16.837	0.0283199	0.233985	1	1
182251	-17.1705	-21.7635	-18.7315	-22.5032	-23.3548	-9.04589	-12.612	-22.2663	-12.1767	-27.8249	-9.10745	-16.2006	-24.9827	-20.3781	0.225554	-20.8113	-18.3549	-18.5658	0.905041	0.971441	1	1
182751	-32.1777	-11.2722	-10.3077	-19.8973	-5.63596	-4.5813	-29.4909	-53.8227	-23.2878	-24.862	-18.6642	-9.86279	-19.9433	-34.2286	14.8874	-27.3957	-17.4019	-18.4364	0.651669	0.857957	0.682106	1
183251	-23.9607	-11.7474	-21.2345	-37.5998	-28.7647	-11.2639	-38.6097	-59.4984	-36.5086	-36.5637	-41.2399	-31.7092	-33.1622	-48.8316	-31.1563	-44.2779	-55.2378	-39.7191	0.284694	0.636779	0.110131	1
183751	-24.8958	-25.8849	-25.078	-35.6455	-36.0421	-49.0687	-39.1449	-39.14	-38.1909	-44.7311	-42.3109	-34.914	-25.8338	-42.602	-49.8757	-43.5732	-38.4769	-33.9901	0.374011	0.707347	0.255443	1
184251	-47.3316	-39.5266	-39.7011	-51.4497	-36.7912	-46.6105	-38.6891	-58.4525	-40.6534	-48.4775	-45.2053	-38.5589	-43.392	-44.625	-36.2087	-35.9077	-29.4542	-47.2497	0.308972	0.651767	1	1
184751	-33.2343	-21.7364	-32.0543	-35.5742	-28.4315	-27.6252	-40.1675	-23.289	-29.2379	-28.451	-25.3943	-21.5231	-33.3558	-35.3145	-15.0229	-22.4766	-31.2856	-30.438	0.299228	0.644886	1	1
185251	-34.5882	-37.0815	-9.81737	-33.1422	-32.0307	-5.37326	-34.5402	-13.6075	-12.3921	-18.4882	-5.63113	-27.1742	-21.8614	-26.9366	-23.6184	-19.5953	-27.9192	-16.4448	0.579786	0.825124	1	1
185751	-52.6882	-31.4955	-29.5244	-20.1782	-26.9627	-17.8903	-35.6372	-24.2495	-14.8861	-40.0892	-24.8681	-31.4342	-18.9074	-17.9676	-11.6124	-14.8003	-42.3642	-11.7788	0.55088	0.81222	0.409754	1
186251	-15.576	-9.64507	-15.6788	-20.3119	-21.4961	1.96357	-12.1856	4.92066	-12.2607	-24.5189	-24.1768	-3.66563	-11.0837	-5.18749	-25.9987	-6.22668	-21.4396	3.9703	0.680631	0.867931	1	1
186751	-0.135165	-7.98947	-4.61082	-21.7802	-6.82647	12.8213	-28.9704	4.56207	-28.1055	-19.1776	-7.41159	0.849478	-13.8931	-10.2613	-22.2925	-19.7153	-10.4545	-12.1999	0.50011	0.786129	1	1
187251	-13.4354	-23.765	-5.85698	-14.7565	-20.4134	-19.1401	-29.5847	-4.67372	-29.0054	-34.9036	-2.66844	-10.2847	-12.8221	-27.7027	-8.39312	-29.897	-13.3838	-13.5708	0.871721	0.962726	1	1
187751	-22.4665	-37.2417	-22.5622	-30.2026	-23.8105	-32.9345	-36.9687	-18.965	-22.6125	-27.5046	-14.5412	-15.2909	-30.6306	-43.9701	-39.7942	-38.8894	-34.1418	-32.3005	0.61375	0.84807	0.120624	1
188251	-26.4556	-26.8069	-30.4264	-20.939	-22.8331	-30.4974	-34.046	-20.7771	-33.9351	-26.0822	-4.60623	-4.78983	-41.8981	-25.9408	-24.6251	-26.9622	-29.944	-28.9426	0.584702	0.830463	0.141265	1
188751	-23.5405	-8.88861	-24.5677	-17.4157	-32.4473	-27.6449	-17.2559	-22.8464	-27.956	-20.5601	-6.78462	-6.6773	-25.3984	-17.7809	-10.4514	-14.5183	-18.102	-7.35861	0.0212733	0.199253	1	1
189251	-9.23594	-20.1982	-14.782	-23.7933	-18.6454	-27.7412	-23.7839	-8.73572	-16.1143	-15.6034	5.32933	-1.9913	-20.4773	-14.8817	-11.0023	-14.5421	-3.40101	-12.9599	0.126108	0.462635	0.48204	1
189751	6.82857	3.97102	8.49648	6.72104	1.35287	3.97671	13.4113	-3.21596	8.99571	14.1886	13.9781	6.57133	3.60821	3.20847	-0.516417	-3.55357	6.5342	5.07763	0.962126	0.990452	0.397065	1
190251	-14.2002	-6.18983	-16.2709	-22.8336	-29.9386	-17.6819	-21.0282	-29.6869	-21.5713	-12.7984	-21.4901	-21.1502	-19.5956	-11.8098	-33.7822	-17.8555	-23.6784	-17.3412	0.997906	0.998148	0.496596	1
190751	-37.8026	-42.2211	-32.7848	-44.7519	-33.7089	-35.7092	-40.2003	-43.6936	-46.1729	-37.694	-32.6803	-29.4643	-19.6664	-25.9858	-72.8987	-27.2897	-32.8865	-24.5056	0.2884	0.636779	1	1
191251	-57.1384	-66.4644	-74.5758	-63.4307	-56.2975	-59.2366	-61.2724	-53.2529	-47.3107	-68.9499	-38.7809	-42.8873	-53.0014	-48.6637	-29.0934	-43.9846	-53.7745	-41.1005	0.0108858	0.146845	1	1
191751	-2.81329	7.14038	6.37643	-0.183127	26.3572	25.5092	15.2204	20.1058	1.00107	-13.965	-3.5451	-8.35939	2.45065	-0.73983	17.2583	-11.0877	3.1623	12.0284	0.130045	0.462635	0.577385	1
192251	-85.0583	-40.2174	-61.9903	-72.7492	-50.2645	-55.9992	-56.3795	-60.184	-65.0109	-59.086	-50.2383	-47.4271	-71.1038	-47.7235	-62.1569	-53.9786	-61.7386	-56.271	0.410852	0.734841	1	1
192751	-17.6324	-1.7423	1.40382	-16.6893	-5.33617	-3.63224	-23.3729	-19.3765	-35.8837	-13.6339	-21.2824	-9.84704	-21.9662	-0.0243208	-31.4174	-20.8458	-20.465	2.65575	0.816047	0.944614	0.534706	1
193251	15.927	-5.65487	20.3199	4.06198	-1.91056	13.0421	13.7858	3.95679	-11.019	-3.32811	12.0536	-1.33492	-4.43282	1.2719	-0.505285	-12.6429	8.97875	4.8559	0.239783	0.581515	1	1
193751	19.5047	5.53778	34.0404	9.78065	17.2021	26.9603	31.3659	7.70215	6.90084	5.2787	7.26314	1.9266	-5.89092	2.63194	9.5285	-0.171764	1.92479	2.9196	0.00174488	0.0565499	1	1
194251	24.9552	29.876	32.2732	11.9451	35.1861	25.0527	20.1294	16.4903	18.2593	39.5322	12.4574	28.5646	23.9133	22.5269	22.8166	28.2577	16.1522	22.6532	0.935367	0.980181	1	1
194751	-29.6453	-27.8854	-26.3628	-27.8958	-23.4042	-27.8594	-15.5835	-3.28423	-22.4008	-4.08188	-25.8417	-17.2681	-11.7635	-18.2043	13.3918	0.229817	-35.6286	-28.3926	0.255927	0.608253	0.743411	1
195251	-34.2815	-33.8629	-37.9979	-40.5815	-40.7711	-37.0061	-30.6841	-20.7882	-32.6363	-29.9014	-33.5896	-26.6776	-30.6275	-30.9195	-13.9086	-21.9182	-47.4552	-22.2781	0.203687	0.54916	0.973252	1
195751	-19.7571	-6.05667	-4.20947	-8.46413	-11.744	-12.5833	-15.3128	22.7299	2.65177	-19.7724	-7.282	-10.5712	-29.47	-25.7907	-3.7119	-8.91506	-25.2469	-9.1185	0.0842202	0.375306	1	1
196251	-10.125	-13.6908	-12.5616	-22.1961	-15.6673	-8.61429	-14.5824	5.29139	-14.7534	-22.4335	-10.9539	-26.8333	-36.4525	-41.8528	-24.5784	-17.9388	-21.4345	-20.2843	0.0699284	0.35022	0.295307	1
196751	5.72483	-24.5425	-26.6898	-20.2252	-7.36047	-7.2377	-2.69637	-15.1369	-11.0795	-22.3086	-13.3876	-22.4415	-20.1201	-35.8593	-16.1855	-22.1743	-13.3145	-2.55091	0.176964	0.512525	1	1
197251	-16.1997	-50.6246	-38.3177	-28.2356	-32.3525	-36.5421	-12.4039	-31.8751	-23.8669	-33.5271	-31.7518	-30.3595	-25.8243	-41.6413	-26.2876	-27.9737	-34.5539	-25.4196	0.859167	0.962726	1	1
197751	-25.5712	-18.4623	-26.2047	-25.2063	-24.2782	-34.7447	-23.3517	-24.8564	-19.1943	-37.7555	-32.7187	-34.6215	-17.4955	-22.5962	-24.896	-31.3695	-27.6658	-26.8542	0.421195	0.734841	0.0214525	1
198251	18.0986	17.0657	12.2897	24.7642	25.8078	15.893	25.0954	30.8617	6.99384	8.39569	10.9686	0.492345	21.3778	5.40256	-13.7885	11.0795	2.1123	17.5663	0.00941649	0.137515	1	1
198751	-21.5193	-5.33222	-1.17663	4.38865	-5.5809	-16.8357	1.52187	-2.02485	-20.7452	-17.7143	8.72014	-3.2644	8.41208	-7.62106	-28.4375	14.6482	-27.3992	5.6946	0.724138	0.888658	1	1
199251	4.45567	8.71478	-4.71163	29.2636	1.7231	5.09433	-4.97813	9.76815	-4.73816	-12.9873	10.2781	-13.3874	9.75708	1.76794	-21.3415	12.9692	-2.09521	10.5786	0.340368	0.682639	1	1
199751	21.7314	-1.14088	13.9466	36.877	34.0239	17.2836	19.986	23.6459	21.3119	15.2588	15.0828	-1.63683	22.9639	12.2692	5.11987	16.5558	34.313	19.0534	0.458309	0.760521	0.287434	1
200251	1.26129	-3.10668	-11.0198	23.1119	-2.19655	-11.0318	7.1804	-7.82594	17.0486	18.7085	4.11118	-2.26113	-1.78929	11.3296	-17.4528	13.2856	15.1393	-3.58897	0.638766	0.856789	1	1
200751	-10.8443	3.92486	-15.0651	12.1686	7.38636	-4.34311	-7.63135	-6.81126	3.45141	7.26629	3.78069	1.73524	-0.622655	12.1122	1.86837	15.3293	6.45054	3.43244	0.12152	0.457337	0.689126	1
201251	-39.1898	-28.1192	-38.8064	-26.2818	-28.1304	-40.8239	-39.32	-33.1028	-32.4025	-25.6976	-11.506	-16.3501	-38.3706	-35.1865	-42.6418	-6.70411	-12.3912	-31.3944	0.256998	0.608769	0.0632721	1
201751	28.2045	32.9446	19.3026	25.3838	28.3727	20.6222	9.9796	27.5129	12.8654	29.3683	34.6416	28.2847	33.3368	25.1644	8.01929	13.8028	37.3836	26.1769	0.415011	0.734841	1	1
202251	6.03396	-4.09787	-13.4281	-6.19102	-4.83356	8.05515	7.83282	1.09279	-3.13396	23.1639	25.1976	-8.25192	6.96918	-3.6601	18.0627	4.07813	-1.60225	-2.4071	0.123291	0.460244	1	1
202751	0.295218	6.68076	19.0936	30.6772	25.3666	24.8711	22.94	24.3562	5.22654	12.1754	3.12098	5.96289	20.0254	20.0575	-3.21682	9.68089	9.41485	3.44764	0.188715	0.519514	0.399374	1
203251	-6.65661	-4.41849	-3.65859	20.0053	-2.97997	9.48207	1.0107	20.3721	5.39321	1.1511	3.06825	-3.05423	3.45724	9.62624	0.0451567	3.7204	-3.70042	6.48414	0.698666	0.875482	0.361672	1
203751	-7.31708	-20.3206	-21.1319	-11.8412	-19.4777	-14.5327	-11.934	-14.1885	-11.9457	-12.2568	-8.48046	-7.85258	-17.0767	-10.5675	-19.132	-11.683	-15.5471	-13.4267	0.422559	0.734841	0.911269	1
204251	2.55032	12.5737	5.63806	12.0212	12.0896	14.3767	0.886104	7.10123	9.55594	5.70385	5.93866	-2.34253	-4.6219	7.93863	-6.55046	11.8452	13.908	16.7337	0.567168	0.813663	0.0319682	1
204751	-33.7397	-29.1843	-8.59994	4.12718	-9.86743	-2.37335	-17.0899	-6.05977	-9.59106	5.23685	-10.0923	-15.6245	-3.7029	-0.731367	-0.0494621	-5.48679	-2.68503	0.931741	0.23443	0.578369	0.176563	1
205251	-29.4183	-21.3791	-12.8725	-10.6264	-7.14037	-12.8425	-0.967571	-4.29066	-20.307	-8.04612	-0.88477	-3.67912	-14.2884	-6.57854	8.05224	-8.01264	-5.7757	-9.11771	0.127457	0.462635	0.665324	1
205751	-17.8722	-26.3063	-17.3157	-16.5063	-15.6152	-24.4427	-4.52075	-14.5314	-12.5533	-21.1775	-3.59572	-8.20946	-27.3525	-26.4472	-18.907	-6.73951	-23.2478	-7.20715	0.892024	0.971013	0.190677	1
206251	-33.6145	-38.173	-27.4314	-19.6045	-9.79734	-25.1336	-25.2559	-6.56877	-12.3288	-18.595	-25.0591	-30.2313	-30.1747	-31.7988	-23.2245	-28.5223	-31.0029	-21.2139	0.462443	0.763474	0.105493	1
206751	-13.8715	8.22775	-0.434282	10.9177	0.850029	8.35925	6.31923	15.9474	0.938566	4.70743	3.52551	-4.89821	8.74842	7.48156	-5.62819	2.42757	10.4292	2.30767	0.794188	0.926769	1	1
207251	-19.697	-13.0599	-7.86655	9.64802	-2.65615	-2.74402	6.3082	17.7611	0.346227	4.36505	1.85246	-7.29822	0.629518	6.1767	-8.58219	8.51182	1.39624	10.9654	0.653149	0.857957	0.0439333	1
207751	-1.70167	-21.6695	4.19331	2.62881	-8.68002	0.554311	-0.840044	1.93225	15.7788	-6.45232	-16.1097	-3.54485	-0.761751	-11.7799	-6.56301	-9.59427	-7.19815	-1.68827	0.117018	0.452764	1	1
208251	-41.1059	-60.1188	-56.4305	-57.2321	-58.926	-59.4422	-57.3175	-46.586	-40.0214	-45.3255	-48.2327	-38.9891	-50.9346	-51.2695	-35.2412	-29.3264	-43.0576	-47.3313	0.0176401	0.190567	1	1
208751	-8.9545	-26.5008	-17.4439	-23.9051	-6.75758	-17.8017	-10.9943	-10.4438	-13.2496	-4.82063	-11.1895	-19.914	-33.0029	-28.2221	-13.648	-10.0408	-16.9994	-5.71677	0.872388	0.962726	0.43043	1
209251	-10.6402	-31.1988	0.689785	-14.771	-15.6314	-7.72337	-19.021	-24.3503	-11.9177	-12.7408	-6.45851	-9.0871	-17.0492	-10.8402	-18.7481	-19.4205	-24.8381	-8.77518	0.84574	0.957906	1	1
209751	-40.8811	-47.5417	-43.6645	-37.4451	-30.067	-35.8593	-44.3188	-42.9771	-34.4262	-44.6484	-18.866	-15.2082	-35.491	-52.7777	-43.8529	-19.4671	-44.9369	-34.4235	0.421276	0.734841	0.49692	1
210251	-71.496	-62.963	-69.1058	-60.8185	-57.5116	-53.4901	-74.2038	-67.033	-46.843	-74.6761	-45.3577	-41.532	-51.4741	-70.7881	-38.4471	-27.6992	-58.4819	-56.9734	0.0829545	0.374324	1	1
210751	-51.4318	-38.7044	-36.7791	-40.7128	-39.3215	-41.7329	-33.3344	-55.6515	-29.2749	-45.509	-25.7623	-25.3738	-29.3699	-50.5916	-13.6308	-23.0401	-36.9975	-39.8741	0.0952854	0.399638	1	1
211251	-54.8089	-51.9542	-48.372	-54.4163	-52.0024	-58.1862	-41.9339	-44.4697	-40.4643	-43.9044	-21.6647	-32.5833	-37.3503	-50.1327	-16.9463	-33.8801	-48.859	-31.8879	0.00412239	0.094815	1	1
211751	-18.6182	-21.7631	-20.0301	-18.9534	-16.7214	-26.294	-29.8104	-24.9916	-15.6226	-24.6637	-13.6621	-22.0505	-23.1567	-30.1744	-14.0144	-19.9543	-39.5766	-17.0236	0.692361	0.875271	1	1
212251	-73.6228	-72.1962	-80.3514	-56.5288	-61.8594	-61.1929	-59.184	-65.3358	-55.7075	-53.8546	-42.916	-59.8461	-53.3266	-61.6595	-58.1958	-47.4631	-77.1672	-59.2964	0.237366	0.580165	0.238957	1
212751	-13.9281	-20.7975	-0.883359	-20.5502	-18.5545	-2.54515	-22.2482	-6.99288	-0.503092	-11.4842	-4.06492	-18.0349	8.42658	-12.5672	-26.3472	-11.9899	-14.1104	-3.25981	0.741455	0.893003	1	1
213251	-59.931	-42.8688	-37.2926	-48.7671	-47.5463	-38.0893	-49.6294	-53.2896	-34.8334	-46.1445	-29.1249	-29.1493	-28.2335	-36.7008	-52.5274	-43.5698	-30.1695	-31.7453	0.0333854	0.250549	1	1
213751	-47.2851	-22.5803	-24.8657	-30.8663	-27.6449	-19.5916	-22.4518	-33.8137	-36.9554	-21.9774	-14.2985	-14.3372	-38.1016	-20.3878	-44.1578	-24.0221	-30.626	-18.8682	0.458228	0.760521	0.563902	1
214251	-41.0768	-28.3494	-36.5026	-41.8802	-24.8497	-35.6067	-43.4084	-34.5792	-33.0591	-29.8952	-11.4479	-21.7648	-40.4732	-27.4008	-14.0525	-12.4495	-45.8815	-28.2365	0.047832	0.296191	1	1
214751	-46.8851	-48.5215	-53.7034	-53.2692	-43.7765	-52.1182	-42.6712	-60.6239	-51.9241	-62.3712	-31.5169	-37.0489	-44.2234	-45.5192	-32.8352	-32.0419	-52.7554	-44.0878	0.0620418	0.337678	1	1
215251	-44.2388	-35.0994	-49.8445	-32.3428	-32.1209	-64.759	-26.7196	-35.409	-44.1956	-39.1588	-27.9071	-21.9744	-44.8451	-35.64	-25.0836	-37.3292	-53.8657	-42.1371	0.439229	0.75151	1	1
215751	-32.6746	-37.2778	-34.2493	-26.7605	-41.7211	-40.0936	-37.1733	-35.2782	-26.5607	-32.5148	-26.3123	-17.2092	-45.6172	-30.0897	-34.65	-40.1715	-44.8623	-46.0192	0.913372	0.971666	0.109807	1
216251	-26.4328	-21.583	-31.9728	-22.3929	-39.3179	-27.7883	-28.6616	-40.0677	-27.9007	-40.6248	-19.5006	-25.3194	-38.7987	-19.7231	-22.7284	-32.8743	-31.7608	-38.5748	0.907191	0.971441	1	1
216751	-10.6699	-6.62936	-14.1541	-3.46627	-15.8937	-15.6192	1.12843	-12.9573	-15.1905	-5.78159	0.429458	-8.82137	-14.0758	-5.89888	-11.9649	-32.3358	9.42936	-10.6846	0.726593	0.890139	1	1
217251	-17.746	-23.9873	-24.3725	-25.5783	-29.1787	-22.8458	-4.36273	-19.0403	-34.9589	-20.914	-3.47222	-19.5439	-28.6415	-11.707	-33.1702	-31.3332	-27.7138	-21.2157	0.911492	0.971441	1	1
217751	-6.03571	-1.33668	0.129206	-7.44911	-14.4085	-11.5788	18.3564	-10.1759	-0.665364	-10.4145	-3.02782	-20.4001	-15.0893	-9.2904	-20.9818	-12.4244	-23.1247	-4.23697	0.0827569	0.374324	0.934853	1
218251	-15.0995	-9.62182	-16.8393	-13.9546	-18.4248	-8.67152	-10.4943	-21.6316	6.65831	-11.5048	-11.149	-22.538	-20.3932	-25.8273	-39.2467	-23.3781	-22.4714	-12.0012	0.108379	0.426929	0.806724	1
218751	-51.7046	-34.2881	-44.3232	-33.8164	-40.7687	-37.4087	-53.8441	-37.2151	-24.6653	-39.0254	-17.5776	-30.4681	-51.648	-33.8573	-51.0677	-32.3987	-37.9262	-32.1006	0.533626	0.811386	0.684083	1
219251	-70.5288	-53.5004	-58.3955	-52.6458	-61.6789	-52.744	-56.7966	-53.579	-49.2256	-61.7898	-27.7001	-25.5784	-55.8291	-61.178	-46.3096	-36.3342	-38.7027	-47.8331	0.0934009	0.396398	0.749959	1
219751	-27.6817	-21.5854	-25.0705	-15.7908	-28.3727	-29.1109	-26.4707	-21.7984	-16.7296	-36.1057	-34.8679	-30.3782	-26.3822	-29.1366	-35.2793	-49.4469	-26.0688	-22.4091	0.0142162	0.167471	1	1
220251	-19.7985	-6.66017	-26.3847	-24.5074	-20.6967	-16.8742	-15.794	-11.438	-8.16787	-25.468	-39.504	-44.6476	-22.1383	-25.1592	-38.2743	-34.6074	-28.015	-13.2355	0.0340876	0.250561	0.861776	1
220751	-9.04684	-8.61628	-20.3535	-18.1313	-18.9085	-27.7257	-10.7738	-10.8997	-6.1179	-24.429	-28.897	-31.0277	-19.6036	-19.6716	-23.268	-19.2648	-27.3419	-8.85577	0.163502	0.496567	0.119004	1
221251	-8.31311	-13.9462	-9.78216	-16.6694	-14.9167	-21.655	-15.672	-22.0001	-23.8838	-22.5468	-22.922	-29.5536	-22.2693	-26.7545	-25.3499	-36.0271	-41.4842	-19.6114	0.045017	0.291792	0.335908	1
221751	-22.6636	-17.3307	-14.0808	-23.7061	-19.3053	-25.5187	-15.6527	-27.1923	-33.1384	-29.8165	-19.3046	-30.8759	-19.1673	-33.408	-18.6485	-25.887	-28.3858	-11.002	0.542001	0.811863	1	1
222251	-32.7512	-41.2785	-31.3529	-42.6147	-38.5475	-27.5825	-32.0261	-36.2798	-53.9679	-47.206	-24.4246	-32.2381	-33.8051	-60.7454	-39.4257	-27.2709	-58.1672	-51.9213	0.417846	0.734841	1	1
222751	-69.1332	-77.5529	-65.1002	-143.227	-119.604	-65.3307	-52.9569	-166.575	-138.371	-83.1585	-75.2666	-61.3028	-97.0168	-137.365	-131.508	-37.8929	-130.364	-138.793	0.978953	0.998148	0.755981	1
223251	-42.2332	-42.6513	-46.5412	-80.4853	-75.0149	-50.3741	-27.024	-72.9938	-76.7418	-49.1849	-42.6032	-50.3448	-49.2342	-74.6359	-77.5791	-36.4754	-55.9931	-69.7433	0.925809	0.978107	0.622415	1
223751	-71.826	-68.8283	-75.8856	-64.9698	-70.7927	-73.9215	-67.3855	-63.7212	-57.2233	-65.4094	-47.5612	-55.6046	-68.8605	-63.3921	-49.2104	-50.8388	-51.8715	-60.3791	0.0285507	0.233985	0.878167	1
224251	-35.4221	-51.6937	-38.6985	-40.3561	-42.384	-33.4463	-38.5548	-44.1381	-15.8942	-45.5944	-26.42	-32.5862	-43.347	-40.4907	-30.5389	-19.1801	-29.6509	-53.3285	0.661379	0.861197	1	1
224751	27.5698	-0.957022	30.7871	27.9401	7.33109	19.8051	11.5856	27.0555	22.5776	11.6905	13.7251	5.3952	6.40894	14.3084	6.19051	1.71072	-5.95248	8.31622	0.0094505	0.137515	1	1
225251	-10.6687	-42.3178	-31.9249	-37.411	-35.4631	-34.4839	-26.4442	-16.5451	-24.0165	-35.6547	-23.0989	-38.3474	-38.8388	-29.0489	-22.6045	-28.7185	-47.1982	-16.9127	0.623911	0.851252	1	1
225751	-10.3672	-31.2245	-11.5048	-12.0632	-16.2085	-24.2887	-9.76737	0.392067	-17.3735	-27.3376	-21.2676	-16.3075	-40.5831	-23.0873	-9.16652	-30.1283	-28.2195	-11.8739	0.0779954	0.370738	1	1
226251	-42.7471	-36.2115	-20.4754	-19.5302	-24.1315	-17.9902	-24.9432	-25.8409	-25.6041	-14.8132	-19.8529	9.29606	-26.5434	-32.3002	-23.3872	-38.3629	-19.2914	-24.0638	0.50309	0.788358	0.16981	1
226751	-41.4137	-51.0155	-61.1876	-47.9007	-59.9392	-40.081	-63.4302	-54.9516	-44.5438	-50.3269	-11.08	-13.6885	-39.9307	-46.2881	-32.8211	-39.558	-50.0653	-52.6528	0.101868	0.413243	0.661309	1
227251	-11.9776	-17.0671	-23.6691	-14.6429	-20.4236	-21.946	-34.3894	-24.1802	-24.5708	-36.229	4.10736	-0.382531	-21.867	-22.8092	-10.1335	-14.267	-29.1804	-6.66916	0.232996	0.576826	1	1
227751	-46.9131	-36.8009	-26.2727	-25.498	-27.2328	-35.5084	-38.451	-31.9898	-30.6805	-38.5467	-27.881	-8.80356	-38.8921	-39.5084	-32.5882	-16.1409	-15.468	-24.5299	0.333009	0.67521	0.327352	0.408134
228251	21.2952	20.5318	19.2092	8.32612	3.24486	6.03967	11.5877	2.03077	4.16511	1.09901	-0.890475	3.40853	-4.60032	-2.84424	-5.79995	4.86596	4.63161	16.9915	0.224416	0.56869	0.00102407	1
228751	9.65188	-0.0883001	-11.5951	-5.38678	-4.72973	0.877915	12.0874	-11.2052	-9.4057	-9.22987	-2.14387	-6.97014	-3.52719	-4.64126	-0.538743	10.2399	-17.5726	-9.92222	0.488628	0.7794	1	1
229251	25.5829	11.9616	6.56874	-3.14727	8.1878	9.35486	10.1154	-15.2343	-4.72593	13.966	-7.09205	-4.26088	-4.16883	6.47594	11.0533	8.43381	-4.15972	-11.3911	0.471009	0.774286	0.674632	1
229751	-15.9171	-13.8836	-16.2069	-21.7072	-24.5807	-11.3637	-17.786	-21.1615	-19.4467	-19.1238	-18.1925	-14.9836	-11.5657	-6.54245	-9.00703	-10.185	-33.8721	-19.4947	0.60939	0.84617	0.401008	1
230251	2.49229	-8.24425	6.35552	-0.196333	-1.0372	-2.16855	6.04513	0.532988	1.53807	2.24502	-0.827782	10.5445	12.1704	12.4448	4.31824	8.5426	-15.599	-0.874826	0.455915	0.760521	0.683263	1
230751	-65.2921	-53.9188	-53.9507	-51.7535	-57.9983	-75.8301	-66.5511	-46.0455	-46.8708	-40.7059	-24.5399	-18.2409	-31.6755	-41.381	-41.1776	-22.4015	-43.4072	-48.1247	0.000226183	0.0201586	1	1
231251	-13.3604	-13.2447	-3.62622	-0.331639	-20.0713	-26.9384	-15.4448	-8.55839	3.33544	5.04837	-3.62795	9.34928	-11.4217	-7.13276	-8.45	3.56098	-13.2719	-13.0335	0.238413	0.580165	0.709944	1
231751	-44.2912	-40.8504	-43.3444	-26.0917	-43.5742	-40.3649	-36.5203	-58.4752	-41.7764	-21.0344	-23.756	-22.5645	-36.9758	-32.8422	-17.1558	-24.2239	-25.6595	-26.4315	0.000261565	0.0207218	1	1
232251	-44.8683	-50.7849	-43.6674	-37.1895	-31.3628	-37.1994	-26.56	-63.5385	-39.3819	-44.3199	-28.3377	-34.6538	-28.9448	-35.939	-38.895	-38.2105	-37.9582	-33.738	0.156973	0.490374	1	1
232751	-74.4256	-84.5775	-80.2176	-84.2427	-77.213	-74.5709	-68.9453	-98.0809	-63.9108	-59.4609	-56.7058	-65.0592	-61.5918	-61.8268	-79.3988	-45.9486	-72.4344	-62.5629	0.00340272	0.0808713	1	1
233251	-30.004	-50.1901	-41.6869	-65.3484	-51.6752	-31.3462	-27.4613	-104.145	-60.1991	-38.6933	-39.5368	-40.6102	-37.6397	-89.7856	-69.3868	-24.5354	-38.8464	-61.6321	0.83598	0.950644	0.932531	1
233751	-21.4444	-39.5489	-37.7814	-46.8145	-44.3941	-20.8845	-35.6269	-93.7931	-53.1559	-49.83	-43.1249	-29.7261	-40.6368	-61.9724	-61.1752	-34.3869	-25.9171	-58.889	0.897522	0.971441	0.596575	1
234251	-19.8347	-19.9473	-22.9559	-6.81782	-24.2194	-20.7313	-29.2169	-29.2518	-14.7711	-28.4672	-34.9553	-13.9325	-33.4039	-35.5574	-20.9125	-32.8138	-13.075	-35.9433	0.0981316	0.409169	1	1
234751	-29.711	-41.7154	-24.6323	-36.7043	-47.0559	-26.839	-37.8027	-47.8127	-34.64	-46.501	-25.8518	-22.2057	-36.9839	-44.7687	-48.5024	-39.5768	-34.8828	-32.6601	0.900755	0.971441	0.933651	1
235251	-89.5781	-80.6177	-61.9205	-59.6881	-72.042	-62.7943	-70.9978	-78.1801	-74.4942	-71.5034	-37.216	-42.3302	-72.15	-71.0577	-48.8979	-58.1621	-62.9429	-70.1295	0.0943339	0.397989	0.847022	1
235751	-40.7773	-24.3537	-16.447	-36.2236	-23.401	-25.7526	-36.1587	-42.808	-30.3751	-33.5362	6.74934	-4.43442	-28.9206	-27.224	-16.3714	-28.5581	-28.3817	-24.35	0.16104	0.496567	0.742359	1
236251	-2.08124	-11.7716	-15.1175	-13.3157	-7.20777	-10.537	-28.1359	-20.3014	-10.4545	-19.0306	9.78888	0.179222	-10.8354	-14.5887	-11.4616	-26.009	-4.64997	-10.0182	0.48095	0.776667	0.811799	1
236751	6.211	-4.51528	-10.4957	-6.22233	-5.98268	4.02954	-9.74989	-15.9431	-17.7564	-13.1144	-12.2823	-8.67603	-13.2016	-17.5644	-20.3196	-19.6287	8.36992	-7.88427	0.380897	0.709188	0.389483	1
237251	-80.1358	-82.2225	-89.3671	-82.4902	-80.24	-87.0782	-82.4352	-86.5428	-74.2836	-74.3747	-78.4904	-48.9694	-76.9064	-73.185	-68.2134	-64.7736	-77.5303	-81.7964	0.00741771	0.129314	1	1
237751	-46.7595	-62.5686	-61.3029	-57.5347	-71.886	-64.4587	-63.769	-62.2461	-40.7669	-54.2391	-43.354	-31.2556	-51.318	-68.0172	-32.7961	-38.4397	-50.175	-46.6082	0.0206465	0.196437	1	1
238251	4.94553	6.84887	-13.2106	-2.73188	-12.4307	1.81958	-16.7362	-7.08616	-3.24143	-6.08156	-1.13997	-1.18795	-4.10332	-8.81405	-18.2512	-9.12969	1.74169	-9.67407	0.638016	0.856789	1	1
238751	-46.0474	-37.9971	-41.7135	-44.5084	-48.5826	-32.4317	-46.6445	-40.6843	-33.955	-33.6611	-26.222	-30.6713	-43.1423	-38.0959	-47.107	-26.936	-43.3886	-42.4807	0.285679	0.636779	0.616719	1
239251	-4.15841	-21.8963	-6.22928	-19.0168	-20.4952	-16.521	-24.0166	-17.4013	-6.25116	-24.2153	-6.04638	-7.88765	-20.6012	-19.2334	-24.6575	-20.2665	-19.0247	-31.6677	0.36247	0.694289	0.718159	1
239751	28.2011	16.4926	23.0929	14.1333	15.0722	1.52201	7.25068	-10.6631	5.3671	-5.45001	7.49548	11.83	-2.86583	-5.031	-5.81003	-23.1495	-6.20437	-5.88403	0.130155	0.462635	0.0415553	1
240251	-35.2217	-30.3033	-34.9779	-48.4508	-34.8144	-35.4753	-29.6679	-54.7038	-47.2971	-43.1682	-40.3703	-27.9595	-49.6209	-51.9634	-44.2045	-51.9618	-34.952	-46.3373	0.38306	0.711255	0.668608	1
240751	-38.2378	-35.3268	-31.3961	-33.1641	-17.3871	-25.7166	-31.4153	-28.7839	-35.818	-23.7341	-39.516	-29.7905	-32.5389	-42.6543	-43.7688	-47.8201	-24.3765	-44.8312	0.220174	0.56869	0.814652	0.408134
241251	-67.0531	-65.8908	-64.4371	-64.1256	-63.3961	-72.7345	-61.0174	-57.6239	-65.3653	-44.1494	-47.0743	-46.2073	-54.4723	-65.5177	-51.5627	-65.7604	-69.3375	-68.0378	0.302997	0.644886	0.00114484	1
241751	-54.359	-46.503	-34.9848	-44.4659	-34.7517	-48.3528	-41.3545	-31.6048	-43.4454	-35.1705	-39.5137	-31.1716	-41.9211	-32.7592	-25.1263	-41.8559	-47.1796	-44.7368	0.320475	0.668124	0.598231	1
242251	-36.1107	-34.5048	-30.7234	-28.8916	-22.0316	-44.672	-37.4902	-35.6067	-31.2694	-26.0085	-49.2511	-22.0542	-42.5856	-33.6554	-15.7716	-31.0248	-38.9343	-38.9213	0.934333	0.980181	1	1
242751	-39.1089	-62.9281	-48.9263	-53.9029	-46.5971	-60.0419	-40.7604	-57.3583	-46.3533	-31.5894	-50.3781	-27.091	-52.162	-50.6184	-44.0123	-38.5204	-59.8435	-49.8586	0.273526	0.629111	0.97592	1
243251	-9.54953	-23.6576	-21.0967	-28.2847	-24.8553	-28.4899	-24.1629	-27.3774	-31.921	-23.3021	-27.6866	-21.1213	-26.2474	-28.2799	-32.4114	-28.9993	-40.596	-30.6196	0.345628	0.682639	0.104664	1
243751	-33.4048	-32.4389	-48.3976	-46.421	-49.4173	-37.5632	-45.7081	-44.9825	-48.5476	-60.1427	-45.6785	-39.8971	-41.2562	-36.6556	-61.3817	-50.0822	-52.5712	-44.9011	0.184329	0.51532	1	1
244251	-17.2893	-25.2548	-25.7013	-16.5146	-18.2696	-19.3684	-20.7784	-22.7699	-13.4087	-40.4228	-15.6218	-20.6968	-23.5853	-36.0549	-55.3935	-35.9378	-32.4556	-29.2363	0.00993686	0.140878	1	1
244751	1.55716	-1.85285	-5.29919	-5.35754	-1.4371	-7.21139	-13.7511	-7.14374	-3.83446	-23.6925	-24.161	-13.4901	-9.78291	-2.48145	-40.808	-20.9088	-26.7962	-20.1746	0.00129668	0.0512356	1	1
245251	-84.639	-103.161	-100.519	-94.4673	-91.2767	-97.9588	-101.309	-120.967	-79.2269	-88.725	-82.6272	-76.9669	-94.4245	-80.201	-99.0442	-77.1572	-99.5598	-86.5847	0.0658742	0.347913	1	1
245751	-87.2104	-73.7403	-67.5302	-70.0343	-78.4032	-76.5402	-75.1499	-88.5075	-62.1347	-62.9249	-62.3114	-55.339	-74.6552	-64.8873	-69.3544	-57.4768	-73.547	-56.3443	0.00771554	0.129314	1	1
246251	-29.1994	-28.7092	-8.00817	-7.90986	-38.3937	-25.2319	-21.7491	-10.2501	-9.55903	-30.8201	-33.0023	-16.0534	-29.5906	-27.5769	-26.2668	-26.1694	-18.5042	-9.55597	0.363212	0.694289	1	1
246751	-57.2227	-66.8048	-66.1263	-64.1531	-64.7758	-71.5524	-73.9254	-47.2955	-65.6309	-50.7211	-59.1704	-52.9878	-67.6626	-52.7897	-61.2946	-55.0465	-56.4384	-62.6288	0.0583726	0.328847	1	1
247251	-31.4504	-35.2093	-36.9072	-25.5383	-37.8792	-51.7132	-42.7859	-34.6055	-37.3097	-33.8249	-40.4704	-39.148	-21.8572	-33.9523	-51.1134	-45.6318	-31.895	-31.2253	0.900959	0.971441	1	1
247751	9.36379	8.73581	-9.09862	-2.94537	-26.2667	-8.44656	-8.1422	-11.4962	-10.0432	-7.44128	-8.05864	-17.9652	1.72902	-4.70867	-11.7363	-22.6234	-14.8153	-13.3825	0.488448	0.7794	0.213288	1
248751	-17.6434	-26.5693	-21.0453	-11.0878	-32.1312	-30.62	-15.0956	-19.9893	-14.0682	-14.1333	-18.7754	-19.8857	-24.9482	-24.5774	-46.7575	-28.0175	-30.8307	-14.4187	0.476876	0.776667	0.598362	1
249251	-5.77119	-23.7269	-26.7987	3.90149	-1.63959	-27.7442	-2.65408	1.5229	-8.1498	-12.617	-25.9451	-34.0101	3.18951	-18.5924	-26.4908	-27.7419	-24.5091	-16.5226	0.142014	0.472502	0.970051	1
249751	-53.6917	-56.3928	-57.3619	-56.689	-66.6641	-31.7599	-32.1262	-80.9201	-80.8515	-46.4287	-57.8979	-40.9124	-47.3628	-84.3669	-84.8455	-50.7325	-73.2382	-64.7787	0.645219	0.856789	1	1
250251	-61.348	-52.4576	-43.1905	-101.85	-99.7928	-35.5692	-58.9798	-139.072	-127.246	-58.1653	-70.2008	-40.287	-67.372	-118.234	-125.234	-53.1927	-111.581	-115.555	0.846397	0.957906	0.312095	1
250751	-39.0623	-49.5614	-40.4193	-33.7892	-49.2645	-47.8622	-61.1545	-51.564	-64.1769	-42.727	-43.3553	-45.1961	-34.4498	-56.7955	-40.4639	-36.5316	-41.2426	-39.94	0.315065	0.66266	0.185149	1
251251	-33.045	-32.3717	-34.532	-35.9281	-34.851	-23.0687	-39.5756	-23.682	-38.9218	-37.6619	-44.8053	-34.2146	-25.4193	-18.2766	-41.8705	-15.6757	-17.1827	-25.3784	0.526329	0.807037	0.211098	1
251751	-45.1376	-31.1586	-61.9791	-31.1577	-31.0372	-25.1195	-43.5541	-22.4145	-30.3864	-61.0985	-35.3933	-29.8689	-28.578	-16.928	-48.3427	-21.8647	-23.3562	-31.3107	0.715179	0.883748	0.608546	1
252251	-9.87035	-7.9023	-9.18318	-1.43731	1.30383	12.2248	-2.7789	15.0815	12.2363	-10.0559	0.368602	9.61196	-6.28119	-1.22832	-9.57437	0.451174	20.305	0.588749	0.92824	0.978107	0.176603	1
252751	28.811	30.006	29.3478	1.93004	15.0442	19.8001	22.8092	9.41025	23.0029	20.8267	19.2877	19.965	11.6746	19.6518	-3.3508	19.0374	10.2881	21.1541	0.47895	0.776667	0.148591	1
253251	13.788	18.2488	16.1626	0.98365	-7.67842	2.25924	7.2789	-15.8828	-1.7407	-3.46486	-5.30435	5.20012	-6.55693	10.8281	-15.9877	-8.27341	-7.56913	11.229	0.397509	0.726728	0.344903	1
253751	-1.48339	21.9175	30.8967	8.70577	-0.167704	31.8326	9.75754	5.52936	7.96613	-19.2931	-11.9415	5.75168	10.9543	10.3362	-24.2831	-13.401	6.77452	20.1321	0.0463373	0.294986	1	1
254251	71.6428	65.9391	56.7078	34.3985	50.0671	51.0643	52.9941	43.6083	52.8356	26.5325	16.2534	30.2882	42.3692	39.1234	19.3013	18.7631	36.7021	40.7405	0.0240063	0.213956	0.294396	1
254751	42.2649	19.3223	2.52153	20.9139	28.678	13.8247	20.3882	9.36193	12.9108	1.75064	-13.302	9.28478	14.133	6.34829	1.3961	9.62594	5.88213	9.0125	0.00847546	0.13137	1	1
255251	-13.8598	-22.0462	-23.7644	-16.7678	-33.4784	-30.5039	-33.303	-11.0588	-39.7955	-22.6536	-36.663	-19.6371	-17.1416	-26.1485	-34.1408	-23.9431	-32.7462	-17.1784	0.880312	0.96626	1	1
255751	-25.0366	-39.7588	-6.24079	-45.5186	-23.8428	-48.3971	-24.5655	-14.4256	-33.6231	-22.2502	-46.9557	-33.6906	-5.40289	-23.7724	-32.7601	-21.4695	-32.9916	-23.7223	0.767812	0.908163	0.818778	1
256251	-26.956	-21.9151	-13.2568	-26.5169	-15.1481	-28.9594	-10.7916	-10.3523	-25.7287	-7.22486	-34.4198	-39.3936	-17.9237	-27.5135	-44.7537	-25.8697	-26.0346	-19.3877	0.146799	0.476008	1	1
256751	-9.03327	-2.45142	-14.0483	-15.6422	-10.3915	-1.83025	11.7435	-5.47899	-2.0669	-3.14404	-19.6243	-45.1301	-13.4388	-0.0364516	-38.6969	-26.4896	-4.2726	-7.481	0.0627428	0.338906	1	1
257251	-15.3791	-8.45675	-32.576	-13.5501	-17.2213	-13.6498	-30.7406	-26.8377	-4.6018	-18.967	-30.3115	-33.4479	-23.7262	-22.493	-33.4678	-26.4771	-7.27762	-8.43335	0.379627	0.709188	0.958849	1
257751	13.5705	-1.80361	-0.202684	8.72534	-2.49126	6.96406	-19.8919	-16.8404	-12.154	-13.8521	-17.1516	-26.8893	-3.75535	-9.07189	-29.3974	-11.0613	-15.951	-12.4836	0.143805	0.472502	0.0779115	1
258251	-11.9528	-27.976	-7.4312	-13.363	-6.49159	-22.1618	-23.5639	-24.0051	-10.7252	-28.7172	-22.8931	-27.4408	-22.4435	-4.82185	-37.0286	-27.6102	-35.249	-37.3449	0.0244707	0.215402	1	1
258751	-47.4753	-35.2812	-40.1646	-30.3404	-26.1719	-49.4657	-62.6261	-24.0939	-35.8012	-51.4693	-35.3369	-41.0044	-50.7179	-39.0841	-36.4675	-45.9178	-44.4522	-40.9904	0.418711	0.734841	1	1
259251	-14.3114	-9.62402	-11.543	-15.0415	-6.33535	-13.5821	-18.1667	-17.6937	-24.0524	-21.1246	-5.43144	-21.5677	-9.39107	-8.52967	2.74588	-19.939	-7.47382	-6.82181	0.434589	0.749601	0.330749	1
259751	2.91313	-7.43612	-6.20431	-6.6609	-6.76013	-4.17188	1.03357	3.55771	-1.52129	8.69958	4.62585	-3.19505	1.702	14.9546	7.80769	7.39364	7.66848	1.1214	0.0262175	0.22346	0.816193	1
260251	-4.33931	9.22386	-20.4911	-17.0964	-18.0216	-9.21011	-9.72335	2.49874	1.56641	-12.2247	-9.04931	-9.59776	-4.19866	11.1682	-0.490629	-8.5687	-6.26046	0.907444	0.596738	0.839199	0.383543	1
260751	-3.33396	6.84669	-8.90351	-7.36429	-9.9467	-6.27677	-6.09073	11.3367	-0.0768658	-15.145	-6.31422	-17.3579	2.23548	21.756	2.25278	0.900841	-2.13676	-5.37871	0.943904	0.983232	0.0643059	1
261251	24.5342	26.4678	7.3226	34.2882	31.1916	34.9801	30.232	36.3582	40.4135	4.41642	23.685	13.2239	28.3444	37.0775	23.7912	21.9919	28.0678	8.88064	0.286357	0.636779	0.103929	1
261751	12.9526	-4.62902	-5.66398	2.87555	8.42765	11.3269	5.71828	4.79228	-6.67343	5.57145	7.62556	-3.9407	1.92593	3.25533	4.40488	4.30404	-10.8988	0.959195	0.576237	0.824002	1	1
262251	30.3503	6.83471	9.11506	7.17918	9.35557	5.45765	0.953104	-4.92977	-7.51506	11.8128	5.57966	-4.38153	17.2141	12.3036	17.8865	6.84221	-3.38003	-8.14826	0.98819	0.998148	0.0372244	1
262751	-0.449736	-4.35252	-14.3076	-9.2617	-8.30123	1.17396	-9.61923	-18.0216	-4.07976	4.54608	-0.859972	19.8165	0.54629	7.73485	6.64593	1.47802	-1.5283	0.258199	0.00138931	0.0512356	1	1
263251	49.5104	15.5979	21.2079	14.9761	21.4724	41.716	28.7756	32.9098	28.4732	28.475	24.5654	27.7465	26.439	20.1698	18.7375	2.18799	24.2026	19.3498	0.15877	0.492187	1	1
263751	28.5857	-20.0912	8.47737	0.282649	7.4571	-3.02567	6.06387	17.0631	9.65684	9.8767	11.0551	8.0616	14.0011	6.36294	12.0975	-0.458764	3.79179	2.2516	0.773354	0.91043	1	1
264251	-11.5935	-6.0748	-13.2667	-8.90802	7.2264	-8.70003	7.40487	-18.9191	1.98996	17.8218	7.4416	2.54811	12.3322	-10.9907	-10.6417	16.0548	-11.7061	-18.9332	0.287373	0.636779	1	1
264751	23.2853	15.059	-9.42155	-9.16792	14.6714	18.4225	-1.94255	-42.1553	1.05577	-0.420422	-13.0393	-5.70911	13.9133	-7.77231	-38.2619	-7.98733	-5.93956	-12.1113	0.251598	0.599963	1	1
265251	-39.0396	-47.3441	-63.2831	-52.4899	-45.1436	-31.484	-43.7034	-66.1482	-37.6988	-52.954	-51.7846	-64.8345	-48.143	-42.6102	-66.2985	-61.11	-60.3484	-40.9612	0.178383	0.512525	1	1
265751	-75.2377	-73.5745	-85.5866	-78.5827	-68.2252	-71.209	-81.6322	-89.3796	-71.3218	-66.5879	-78.442	-88.3405	-63.2717	-73.3861	-67.2361	-47.706	-73.0643	-59.6008	0.203358	0.54916	0.420331	1
266251	-3.4211	8.66533	1.69353	-5.77313	-3.75002	-10.0913	-9.49978	-5.40007	-2.11423	-3.96336	-12.173	-21.9092	3.96804	9.23829	-2.2369	4.41294	-9.33687	-11.7405	0.790792	0.924319	0.117936	1
266751	4.5659	8.39433	32.4715	12.1629	-1.94802	15.1867	25.1392	-5.39707	14.8038	3.98664	4.451	12.0048	19.166	18.9433	10.4781	-2.02506	-1.87887	19.6325	0.651601	0.857957	1	1
267251	11.3303	22.0244	21.6863	17.3154	-1.59651	26.4889	41.8461	22.6429	23.1021	20.7779	7.14916	21.2415	33.6687	18.6627	8.34342	15.4543	22.0041	28.0984	0.830291	0.949879	1	1
267751	28.9469	37.1984	35.6651	21.6498	28.3153	18.2003	18.829	29.4695	28.0603	33.4572	1.50154	18.4114	44.4413	49.1975	20.436	37.788	29.1779	17.7063	0.928721	0.978107	0.441178	1
268251	-21.0473	7.35286	7.97392	1.22861	-8.45964	-10.5621	-13.4303	-20.7573	-19.4756	2.86229	-18.2853	0.465241	6.16634	9.4872	-9.85863	2.4233	-8.13546	-9.04256	0.328281	0.67521	0.781263	1
268751	-21.9869	15.6591	-6.75466	8.368	1.94142	-5.44531	2.97998	-5.95515	-18.8056	-4.41568	-22.4357	-2.91335	4.46586	1.92203	-0.936927	-0.196552	-0.95613	-4.87601	0.993747	0.998148	1	1
269251	7.58492	18.5984	-6.73291	-1.78617	7.97725	-2.48771	-2.912	3.82053	-2.83966	9.98823	-20.6455	-4.94158	2.13031	11.9405	8.30197	7.939	2.62489	6.88534	0.94462	0.983232	0.86277	1
270251	-52.2871	-43.996	-56.9688	-29.6155	-19.4709	-48.4422	-53.1247	-31.1116	-23.608	-42.2521	-34.5469	-35.2632	-26.5191	-23.2095	-11.8103	-32.1536	-38.7377	-45.6794	0.405789	0.731822	0.156972	1
270751	13.6243	13.5524	-15.8197	4.92536	-14.3275	13.7759	-20.8939	-15.5181	18.8491	-10.1991	-3.26084	-9.08451	-2.8123	8.18472	12.9594	-11.0347	-4.33193	-0.618552	0.738913	0.893003	1	1
271251	16.9239	25.2643	26.153	17.7499	4.36972	-2.10084	2.43245	17.9403	2.7852	10.322	-19.8805	-8.56486	10.6928	10.784	9.33923	0.759875	0.159378	-4.01435	0.185746	0.51532	0.142759	1
271751	50.2054	56.4692	62.8282	42.9074	47.5432	30.0789	10.8535	37.7134	18.4179	18.1708	9.74829	26.0124	26.6891	41.5126	24.8329	21.1745	29.6574	21.9537	0.222207	0.56869	0.0140187	1
272251	20.4538	19.3447	20.9793	17.7587	28.1768	9.59531	0.77425	14.2816	10.3647	6.78754	3.52728	2.83454	18.1845	26.1288	24.155	8.31849	12.1222	8.53585	0.627821	0.851446	0.00751357	1
272751	25.1083	35.0816	-3.91905	20.3903	26.13	-1.12947	-15.1445	28.534	16.8488	17.2807	6.06757	10.1282	23.1086	26.7691	31.5668	23.0791	14.7435	13.339	0.559179	0.81222	1	1
273251	58.1485	61.2803	42.1108	58.4154	48.0535	39.4275	54.5393	58.021	27.3225	24.1154	29.0738	31.1511	35.3524	33.2339	29.7678	47.2516	47.1832	39.7365	0.0547984	0.315091	0.599168	1
273751	41.7883	38.5037	51.9731	37.0182	22.9766	34.2257	26.7441	28.9842	18.2719	20.6918	33.6707	25.1955	46.8671	27.8426	19.1515	24.9092	18.866	23.0947	0.345399	0.682639	0.191672	1
274251	23.3136	9.75198	19.428	-9.91145	-14.6764	6.21291	-6.62772	2.97128	10.3036	4.90345	15.2266	12.0693	25.4129	13.2343	21.8929	-1.71196	9.05818	13.3652	0.367836	0.700729	0.0398259	1
275751	19.7405	24.6491	14.8251	31.5155	31.2139	27.2909	34.2789	26.5038	41.1307	47.1326	35.9754	19.1934	38.3265	29.5355	35.3424	30.8068	28.6428	40.6109	0.228114	0.56869	0.653061	1
276251	37.7875	40.5434	28.3333	61.1633	39.9067	41.1281	32.2721	40.9946	42.512	51.3429	40.5094	31.0087	54.1116	30.4901	45.7876	38.7517	47.914	62.4404	0.380776	0.709188	1	1
276751	1.24375	23.9507	18.6013	10.8247	-2.22718	11.9393	3.39025	10.8476	30.4987	4.57254	32.7713	30.0575	20.3635	9.65181	12.012	28.3065	33.5732	25.2088	0.129939	0.462635	0.989303	1
277251	27.8883	27.9404	17.4613	15.6814	13.7615	24.9769	-1.64385	24.4969	17.9611	19.1789	35.5392	26.7855	22.2157	23.1587	26.7234	23.5933	32.5811	20.8504	0.0725508	0.358069	1	1
277751	27.1396	9.31991	-14.1815	4.01759	20.8364	5.53434	11.8075	18.0987	-2.227	5.84386	1.94901	-1.71234	0.816665	12.0011	5.40201	-3.16702	5.04842	3.97335	0.228043	0.56869	1	1
278251	45.9594	56.9802	24.4052	32.1154	32.1902	33.9809	50.8515	45.9424	28.6289	43.9418	26.7053	21.0414	43.9181	32.8656	25.0649	17.8285	29.4934	42.0717	0.14821	0.476008	1	1
278751	29.1058	85.0192	58.5859	32.4304	42.7847	50.4034	50.0427	26.4175	41.7538	39.6636	40.2905	26.6435	45.1198	39.9549	39.0701	17.0992	34.7646	35.2782	0.177758	0.512525	0.974088	1
279251	24.718	77.9521	54.0889	45.663	54.9674	42.9911	55.1438	65.4448	49.771	53.7009	28.9836	42.4271	35.9382	50.7449	70.5087	26.6791	50.9317	42.4279	0.273118	0.629111	1	1
279751	34.0015	51.1248	43.8268	54.8492	52.3901	52.644	62.228	70.6952	50.594	48.6579	50.9085	60.3154	55.9134	55.4207	40.342	41.2872	60.7149	39.0931	0.714337	0.883748	0.401038	1
280251	42.7119	34.0561	42.4028	45.0505	36.0504	46.7824	36.2281	47.247	44.3096	51.1025	51.1236	47.4975	46.5012	40.7098	29.1645	29.1485	40.546	39.5465	0.990214	0.998148	0.273716	1
280751	39.9593	36.5276	39.297	67.2363	47.659	30.9085	35.7245	31.344	46.2118	46.8797	55.6186	50.7602	30.8006	49.7511	42.1108	29.7901	38.3465	35.95	0.92771	0.978107	0.447835	1
281251	51.422	33.0253	38.219	60.1019	69.889	45.3103	53.9454	43.109	55.0282	31.2841	46.3547	47.9544	42.4247	59.0504	60.7265	36.8633	51.2363	46.2176	0.646497	0.856789	0.36631	1
281751	59.7279	43.6182	52.7403	43.8135	70.2857	53.8489	58.1469	59.4515	59.1662	50.8561	48.5601	45.9891	38.9115	51.268	56.5424	37.4855	61.6938	47.8253	0.0890996	0.389368	1	1
282251	29.1381	31.1201	27.1293	35.072	30.1514	26.5057	30.951	50.8469	26.3874	37.8463	25.3763	25.1207	22.0029	35.65	38.2661	25.7184	47.5049	27.929	0.956619	0.990452	1	1
282751	7.8599	9.02933	10.1975	20.9549	19.587	13.0367	23.8772	18.5059	2.46377	25.8756	9.35	0.290776	-0.58796	3.74929	1.4821	25.5939	25.3411	16.2585	0.773612	0.91043	0.108168	1
283251	25.0844	36.7062	44.8092	28.9534	38.0572	30.6349	48.1375	36.6964	19.6909	18.4338	15.4893	20.5734	17.5761	19.5886	8.38791	31.4325	24.7664	37.6067	0.0638046	0.34205	0.518553	1
283751	54.5509	54.1446	56.5477	46.1007	50.8478	43.4279	53.1224	62.3277	47.8281	49.364	31.251	39.2561	47.4832	33.3749	48.4343	24.9478	36.2383	64.0859	0.0300861	0.240566	1	1
284251	37.8534	34.8342	21.0327	18.5845	26.5659	22.8144	26.8087	30.4648	32.2333	43.7892	18.8767	21.9648	18.4768	30.4723	22.555	15.7235	16.5787	16.1358	0.305904	0.647209	0.54187	1
284751	62.2347	75.5787	61.0577	63.8542	60.12	65.9521	54.4833	66.8334	63.5408	84.3697	39.5348	48.9586	53.2068	74.6849	40.3317	42.3119	65.9242	53.2533	0.179955	0.512525	1	1
285251	3.31441	16.6312	18.2757	8.54547	7.30494	16.3244	-12.3283	21.8038	16.5143	26.5502	8.36575	8.94379	16.6598	14.3423	7.91004	-11.6845	13.9917	9.06185	0.959845	0.990452	1	1
285751	59.2234	56.5644	68.9789	28.6983	53.0038	44.2265	60.4099	42.6285	38.1606	45.0545	36.8957	26.7871	39.473	39.237	41.9583	8.45034	34.3518	50.7923	0.0898795	0.389368	0.76035	1
286251	42.5738	53.2587	59.3073	36.7707	22.6588	26.0053	39.4143	21.4896	35.2867	18.5075	32.7183	21.1505	26.8355	33.0128	30.09	25.4155	29.0432	32.2378	0.260333	0.612598	0.0287002	1
286751	32.8032	29.8707	49.743	23.3682	29.1153	16.6775	37.1852	21.6996	21.441	4.09683	9.26144	15.9273	19.1371	11.7472	18.1953	18.0648	10.2491	16.3808	0.0316909	0.242964	0.365262	1
287251	77.1002	58.462	88.6157	69.4045	66.3496	82.4996	80.2443	61.8527	68.1844	46.7934	56.4322	40.7088	51.1845	64.5604	51.9595	46.4485	56.3901	47.2476	9.51233e-05	0.011301	1	1
287751	14.1452	17.009	30.8268	20.5341	4.87855	14.9355	10.5457	7.95764	17.0795	29.5703	1.81726	7.9953	3.58761	35.0937	20.2907	15.0694	27.2907	18.4098	0.619099	0.851252	1	1
288251	-15.2323	11.0028	15.8854	6.36065	-7.1229	7.67933	-13.1831	-25.6389	-0.289162	19.6717	-15.9179	-4.5414	11.7681	6.07494	-10.6485	12.2292	8.67279	-1.7984	0.411055	0.734841	1	1
288751	2.29283	7.11353	11.4772	16.5848	17.0655	12.0433	12.0786	10.6431	13.0225	23.0124	4.77041	4.51748	21.1429	12.9167	20.6335	14.5727	17.4105	20.4191	0.289383	0.636821	0.459133	1
289251	50.3372	36.1134	37.8773	50.2988	32.2907	41.2782	20.699	30.9486	31.7528	29.2757	33.099	21.7649	31.8903	50.9407	53.3708	25.1314	21.565	42.7168	0.75077	0.895575	0.166313	1
289751	14.9656	20.6597	24.1898	31.7637	-11.8282	20.6388	10.1861	19.6565	17.1003	27.9821	28.9306	13.146	16.2258	9.08168	26.1436	21.6822	25.327	1.58075	0.62933	0.851446	1	1
290251	58.9332	45.2764	46.4583	66.7058	21.7337	69.3852	51.258	49.4976	43.0138	60.8067	37.777	34.7599	39.0513	34.6007	47.3308	42.8564	49.234	41.5138	0.212015	0.555761	1	1
290751	32.9606	45.9498	21.9369	37.1846	26.8571	49.2048	30.1867	31.6821	23.0764	39.6473	17.5425	20.087	39.9944	33.4108	33.0861	27.9519	41.8737	32.9725	0.749158	0.895575	1	1
291251	53.6441	90.3366	55.9989	37.5267	40.4553	69.0498	41.8374	64.7447	65.4315	59.7244	45.0585	36.2006	58.6362	51.4131	50.7361	36.1392	66.8194	56.1094	0.34396	0.682639	1	1
291751	-10.1188	1.12996	-5.28375	0.459056	-13.8779	-1.31132	-19.0836	2.70031	10.3713	0.886165	16.7434	10.6296	10.0693	-2.20711	31.5366	8.2377	14.1012	16.0472	0.00292406	0.0744592	1	1
292251	-6.282	-7.80372	-5.86701	-1.53911	-9.98003	0.495272	-21.3236	-4.99301	0.578174	10.8361	14.8147	8.40135	5.27272	6.41642	27.3415	17.9823	3.15226	7.92959	8.26949e-05	0.011301	1	1
292751	27.4727	18.6139	16.2719	25.3406	15.1784	6.62889	17.8687	29.3117	13.0184	23.7243	27.2767	17.2372	29.8793	22.2252	35.8674	23.0433	24.5325	17.8834	0.082722	0.374324	1	1
293251	23.7859	25.1954	14.2501	38.3628	24.8933	5.06729	9.274	34.9905	22.8883	21.5552	44.1285	28.2084	23.1743	28.8575	37.043	20.893	20.3229	19.0653	0.302873	0.644886	1	1
293751	31.2514	11.8546	10.704	19.1012	21.1743	11.8136	25.8535	6.49469	17.1498	17.0697	32.8138	16.8434	20.1875	10.0545	27.719	22.2965	22.0533	37.303	0.163082	0.496567	1	1
294251	-43.0338	-50.3144	-48.4266	-46.2172	-50.8917	-43.7407	-31.2284	-55.2602	-41.3341	-32.5082	-39.9179	-32.2768	-33.4912	-39.1708	-28.7705	-26.1295	-37.7295	-24.6605	0.000496935	0.0322104	1	1
295251	58.8713	62.4886	63.7275	36.4202	34.3863	43.4071	44.7623	51.4476	50.2224	40.3683	53.6741	28.4368	36.2778	48.8354	31.6377	37.9191	37.7752	56.1469	0.30066	0.644886	0.108432	1
295751	40.3636	26.1539	53.2065	46.6926	16.4354	23.1653	32.8815	41.2397	31.138	34.5999	35.715	36.6177	9.15366	40.1861	32.951	23.609	50.9984	26.3013	0.677294	0.867931	1	1
296251	55.9848	42.1123	53.3564	37.1424	43.2329	41.135	65.9785	63.0241	46.8633	37.0232	40.654	41.7312	48.4661	59.9102	38.3589	48.9743	51.8194	49.8011	0.594704	0.839148	0.096723	1
296751	30.6145	21.4262	28.2677	11.8564	16.9992	33.9185	29.6937	25.0744	37.4043	30.6142	33.553	39.093	22.9768	32.3057	10.6113	31.7719	32.5266	29.8238	0.544469	0.812147	0.45528	1
297251	31.9741	36.0471	31.7903	21.399	32.8304	38.7257	19.111	39.5799	40.7944	43.0463	34.5433	28.4657	24.7149	48.222	28.2751	41.1464	45.0469	28.916	0.399547	0.727675	1	1
297751	33.3	28.9589	21.5507	24.4091	28.7776	33.035	23.7156	31.6901	43.0457	16.4596	28.3186	-12.0613	27.4681	39.4512	13.4355	12.8893	23.6006	14.5915	0.0424052	0.282569	1	1
298251	73.1312	61.3916	75.7895	62.3642	50.3791	59.439	58.4044	63.015	37.6524	41.6202	35.8729	22.8426	63.7069	56.541	42.7484	29.8958	42.4973	45.6069	0.0916338	0.391227	0.129471	1
298751	51.2673	66.1409	66.4129	31.2841	40.1561	50.3289	46.4797	10.5981	33.7292	49.347	30.9441	36.5733	45.522	37.0754	11.0613	29.1706	39.8037	38.5829	0.406454	0.731822	0.226284	1
299251	42.9341	70.1014	69.4088	35.1704	50.9543	29.1443	30.4301	9.21619	20.8177	32.7735	11.1013	13.9687	39.6671	29.6152	11.7508	4.72958	35.3881	25.2064	0.226335	0.56869	0.0858726	1
299751	77.8702	90.7643	75.2633	57.6454	57.6202	56.2408	51.8162	72.4562	51.7651	38.6439	43.2429	31.0463	71.7228	52.1083	53.7422	14.5319	45.4692	34.5505	0.115979	0.451875	0.0184733	1
300251	87.8161	97.6609	89.0197	93.3571	75.1769	89.8251	97.7666	107.674	69.5987	61.5316	60.4729	39.918	88.729	69.1606	62.0687	52.5676	88.1205	72.0644	0.00223821	0.0664935	1	1
300751	57.5598	63.2147	69.5808	49.7367	58.6321	36.8019	57.393	63.7262	42.3402	49.1121	39.2918	45.0172	58.1358	57.7271	44.3109	38.6606	58.1989	66.8647	0.440577	0.75151	0.684213	1
301251	48.7346	37.1783	35.0812	38.4374	40.4315	28.028	46.6515	39.33	38.6599	39.0848	36.0615	28.8006	26.3261	39.781	45.6411	38.0189	45.3903	42.5476	0.694382	0.875482	1	1
301751	40.3847	46.6316	47.4522	51.7032	55.8608	25.5576	37.8925	54.7668	36.9902	61.5891	51.8463	27.9839	45.9585	36.2427	70.6348	35.1338	52.3774	61.0184	0.390841	0.71822	1	1
302251	8.33069	30.3269	32.9549	36.9706	22.6204	31.4679	9.76565	24.1897	22.6684	37.7513	24.5187	32.7812	44.1443	30.3522	33.0064	29.2883	46.7655	33.3054	0.022671	0.204613	1	1
302751	4.71623	-0.359481	20.6969	10.1738	17.056	21.8248	-2.7322	32.8182	4.74937	11.6853	20.8166	20.1736	16.0546	20.816	29.4406	9.81041	19.6907	19.2376	0.154168	0.488542	1	1
303251	-27.8865	-27.1421	-9.97308	-19.9439	-21.2644	-28.5629	-20.7865	-11.1496	-25.4539	-20.622	-11.1454	-27.5533	-25.2801	-17.9708	8.57671	-11.3406	-19.2136	-6.13722	0.135987	0.466147	1	1
303751	-34.5786	-29.4816	-31.7211	-11.7637	-14.5722	-31.6855	-21.5981	-39.0095	-13.9784	-15.5905	-8.1853	-8.90287	-16.677	-20.465	0.568287	-14.0557	-11.4512	-1.6807	0.00243177	0.067572	1	1
304251	-15.6988	-10.6775	-17.0571	1.79528	-0.714211	17.7524	-11.4274	-16.2076	1.15684	5.54965	11.5714	0.499971	6.96761	-9.88028	-10.3184	-7.66329	2.10458	15.5421	0.352849	0.687381	0.170247	1
304751	11.6173	27.2486	21.7625	16.9132	14.0193	34.1031	29.0243	4.62564	13.8054	24.1743	1.66411	-6.84617	35.3928	12.1294	1.60567	-0.72285	40.7062	23.1069	0.483647	0.776667	1	1
305251	13.3388	21.4335	-4.24237	5.65881	14.1753	15.0827	9.33985	27.9005	12.1599	28.7998	20.1249	2.60284	49.7496	-0.277582	19.6366	6.55668	34.6508	33.9002	0.17595	0.512525	1	1
305751	50.2442	49.113	29.6828	27.846	57.7274	43.5532	33.3281	43.6539	45.6158	45.1238	37.6899	29.4052	72.9655	43.1302	31.8584	49.7408	40.983	38.0401	0.869316	0.962726	1	1
306251	20.5926	23.4879	7.55146	18.8476	19.6094	19.6123	4.9205	21.5867	36.296	39.6649	21.857	23.5207	35.5357	34.8861	26.704	53.471	20.0594	25.4703	0.0203076	0.196437	1	1
306751	31.7651	51.3759	33.6327	45.1601	39.9289	39.0791	41.1426	38.0867	46.2527	56.2336	43.3569	29.927	29.977	42.5756	46.5907	36.5526	49.1535	48.4974	0.6203	0.851252	1	1
307251	33.3036	39.3847	34.8888	21.2377	36.9088	38.1498	45.2681	19.7095	37.8583	35.1631	45.1756	33.233	21.6968	52.9487	47.2706	14.3502	56.993	38.0557	0.448027	0.756974	1	1
307751	59.4768	79.8785	84.0236	44.5388	42.0253	66.1707	51.7798	55.2985	42.1999	55.9508	47.3869	45.1748	50.7986	77.2744	65.7316	12.8257	64.7748	54.0342	0.60348	0.8434	0.353306	1
308251	39.8191	64.6066	73.3684	34.4048	63.74	54.5612	41.0076	51.7091	34.406	62.0098	46.3279	38.927	65.2249	47.8269	60.8693	29.4371	71.7936	46.6935	0.849166	0.957999	1	1
308751	43.0324	34.7981	48.5006	26.995	39.2509	25.5866	38.604	42.5139	24.4289	32.1388	54.3558	42.4712	53.5229	26.4672	53.4559	30.6258	66.392	45.3654	0.106829	0.425525	1	1
309251	74.2222	33.8468	51.9356	39.2042	36.9056	43.5261	58.656	39.8542	52.2275	35.1264	35.573	36.8989	62.5704	40.9885	62.3842	25.6089	52.2588	28.7756	0.508969	0.793123	0.442033	1
309751	37.215	21.7621	23.7939	23.217	38.7114	23.8451	14.5948	32.1648	26.34	27.3219	1.54759	6.03608	13.4162	11.2259	56.9947	12.6541	21.5667	13.3689	0.173736	0.512525	1	1
310251	46.1887	48.2548	54.1804	30.7916	40.0471	60.5973	22.6579	35.5171	34.6438	39.5787	38.0921	27.9086	28.3951	17.5229	37.6305	38.8812	31.2028	39.2626	0.248053	0.595493	0.312974	1
310751	37.0463	28.9935	65.4514	39.6623	62.9708	54.378	31.1358	48.2024	21.5402	49.1761	34.794	20.8135	14.4723	23.4309	15.9309	40.265	35.6577	42.3692	0.21494	0.561364	0.335989	1
311251	20.8385	24.4414	34.9053	25.2623	30.5007	24.4141	25.0211	36.8086	4.60104	25.4109	20.2784	23.3037	26.0606	24.9471	20.0256	18.2047	24.704	25.4674	0.540544	0.811386	1	1
311751	-11.4779	-6.85476	-0.302549	-2.14309	-18.446	-5.15518	5.35253	-3.93495	-18.5154	-1.9735	5.77635	9.87693	1.6934	0.134545	12.7098	-3.32243	-18.0986	-3.55931	0.180176	0.512525	0.738268	1
312251	19.5811	7.30284	49.0046	31.4336	16.6198	37.4114	24.6478	21.8819	22.4313	16.3992	41.6199	19.4953	33.484	38.9625	15.8605	39.87	22.6247	24.878	0.64159	0.856789	1	1
312751	0.83075	0.195657	22.7553	-4.31029	1.54182	12.0153	3.75925	15.0106	7.10567	0.815544	25.0083	-5.31946	16.2745	7.61481	18.131	29.2625	11.6062	12.5138	0.190997	0.523771	1	1
313251	9.42424	-2.38516	21.9932	1.07812	33.4129	4.87367	4.25473	6.30077	16.4651	-0.888993	11.8485	-4.41147	28.1807	1.76576	24.187	10.888	11.1856	10.2685	0.960048	0.990452	1	1
313751	9.93377	3.33973	2.80183	19.4107	22.1891	5.00088	14.241	16.2302	15.5742	12.2981	4.36482	5.23618	21.0988	10.9211	12.8999	9.53355	8.54491	27.6997	0.924237	0.978107	0.43679	1
314251	20.7684	28.9715	34.5274	15.9103	20.552	20.5471	31.0007	39.0001	10.1212	35.6511	22.8542	20.8908	44.6352	35.7572	19.8532	29.4354	33.1516	40.0181	0.132367	0.462635	1	1
314751	-29.1261	-19.2537	-28.027	-12.1891	-16.8933	-43.4068	-12.9476	9.94433	-31.3338	-15.087	-31.0415	-32.7589	-2.96323	-17.036	-21.2098	13.4709	-19.3526	-13.0014	0.540303	0.811386	0.831206	1
315251	0.458547	18.9999	9.02692	23.4731	6.0956	-0.212858	24.2815	36.9344	0.866137	18.144	-8.10243	-23.0483	16.5329	14.7132	15.1097	24.8244	11.9194	-2.97222	0.452597	0.759298	0.888316	1
315751	0.0417699	18.3497	-9.05817	-7.89833	-8.65192	-0.479123	6.38503	4.9072	-7.42676	2.86013	-6.42918	-20.0568	3.59676	22.1211	14.4989	14.8046	6.26291	12.1637	0.457209	0.760521	0.180357	1
316251	28.7506	17.3097	30.8337	32.4502	31.7928	16.915	20.8264	24.9377	29.8378	21.5127	3.21562	8.60435	25.7458	36.1466	17.3555	12.3125	13.1913	15.8663	0.135832	0.466147	0.43363	1
316751	20.6205	6.24439	21.4803	-1.50366	5.88274	-9.53394	0.184078	11.8496	16.431	7.89594	6.62138	11.0437	6.45165	3.92511	25.2286	5.39866	3.73895	2.32639	0.985749	0.998148	0.223503	1
317251	17.5353	16.6022	1.56665	3.75594	13.7372	6.91462	-0.879376	8.54146	1.47507	1.44591	13.9006	19.4352	-10.0106	9.50634	40.3514	6.55154	19.6366	28.0072	0.242308	0.585646	1	1
317751	30.9941	32.4548	31.2756	31.1496	28.4888	32.3464	15.6598	20.6389	15.3373	16.9142	15.2099	33.7653	22.074	15.8405	55.9255	25.392	26.3287	34.884	0.8778	0.965851	0.745267	1
318251	-6.25225	14.2567	3.55228	6.52971	11.7858	7.09731	-14.0617	-5.11839	8.12967	11.7835	11.7503	31.5595	7.11849	12.4988	40.043	11.5115	28.3112	12.6598	0.00600511	0.118934	1	1
318751	31.9791	32.6819	24.5607	31.3851	15.0699	28.7291	32.4546	36.8367	33.0617	39.7786	14.6369	27.72	26.334	24.8166	46.1677	41.2966	38.5435	43.3724	0.450546	0.759298	0.603321	1
319251	52.5207	43.9799	29.8219	42.9566	32.5874	56.4669	34.1747	49.2637	23.7584	33.8483	10.2667	32.3442	30.5323	41.9062	48.5034	49.1213	36.3025	43.6554	0.509468	0.793123	0.730413	1
319751	7.12028	17.0086	3.62095	2.87626	18.756	21.9295	6.58455	22.983	9.26781	17.6907	9.53857	30.3962	17.4706	26.2551	49.3338	0.295087	28.6185	7.59505	0.208689	0.54916	0.93674	1
320251	56.0883	48.5624	49.7353	38.9784	53.9705	51.1269	56.5861	62.9359	55.6161	71.3199	42.4432	57.1875	59.1107	68.4177	75.0434	15.0383	49.6371	53.3354	0.831372	0.949879	0.221566	1
320751	77.6707	68.4869	62.8709	60.0456	67.7554	58.8739	60.6057	70.0927	70.6024	65.4893	60.3387	53.8202	73.1593	79.4172	61.0764	40.6023	73.7555	82.7834	0.883592	0.96626	1	1
321251	71.7109	67.8606	59.4527	44.1777	53.3138	45.8869	39.3774	70.7327	64.7791	49.316	70.13	51.3771	50.8772	56.7189	55.8753	42.2768	61.0353	58.4939	0.687933	0.87277	0.692764	1
321751	51.6899	70.3402	59.8303	45.9755	52.9187	48.5849	40.5609	53.4325	64.5572	47.3331	59.1741	44.3071	36.2695	41.107	33.7144	43.7225	44.7608	53.1543	0.148035	0.476008	0.325843	1
322251	64.2095	72.7692	42.2458	52.9785	55.0496	34.9388	46.4179	62.7697	48.5431	55.3559	42.8752	36.4911	41.8254	61.4054	39.6	42.0272	53.4039	67.3012	0.421439	0.734841	1	1
322751	36.6505	43.7971	27.6051	33.5795	41.6699	15.9159	44.9539	49.4858	29.2687	45.7466	6.74942	28.4294	40.5325	33.3265	21.0784	16.9108	47.3018	55.9509	0.646375	0.856789	1	1
323251	3.86473	21.2136	1.13972	8.38875	-2.01445	15.0698	22.1745	11.313	16.9721	13.132	-6.78427	25.9739	16.2592	17.9815	20.3801	14.2984	19.5864	9.371	0.412953	0.734841	1	1
323751	8.70828	38.1346	32.884	19.3913	21.537	25.5525	6.64255	12.67	18.8188	30.0807	43.4796	52.8202	37.4326	38.9501	45.2928	16.9241	22.7875	18.108	0.184391	0.51532	0.0533116	1
324251	57.0649	79.0621	50.4158	73.3985	65.3244	60.4784	50.7441	65.522	62.0636	58.3255	87.1606	86.9815	70.4102	60.9128	66.7775	47.8765	51.909	70.8665	0.547823	0.81222	0.686954	1
324751	56.8929	55.8788	53.5845	83.2382	31.7245	51.6165	64.6012	78.9834	56.8919	64.3437	87.3387	81.5485	74.4381	60.744	55.5611	60.1419	58.7611	61.5726	0.296291	0.644072	0.889448	1
325251	66.7447	21.1525	43.0842	59.1278	8.60928	31.3272	48.7767	46.2314	19.2145	39.2894	42.6272	49.9793	42.8919	39.8073	35.9593	30.5234	16.2986	35.8322	0.866888	0.962726	1	1
325751	91.5089	72.4543	91.096	68.2129	51.9417	66.6962	77.4454	71.7633	59.5442	75.065	56.7365	61.9821	58.5188	73.776	67.9362	46.2789	66.8254	67.5986	0.29267	0.642073	0.28684	1
326251	63.6806	49.57	86.401	51.0665	62.6676	63.3949	89.2763	46.3693	58.3946	75.9754	51.9916	43.7173	50.2079	67.9903	61.2509	64.254	64.8012	60.3742	0.58676	0.831729	1	1
326751	31.1313	17.9136	38.414	42.1673	47.532	28.6575	39.0415	48.174	50.9908	55.4567	27.8686	24.2732	52.9726	48.7781	62.5388	40.5171	44.6775	33.177	0.536227	0.811386	0.225079	1
327251	8.0139	-7.84467	-5.32247	-11.8841	9.46998	-3.92328	-16.4308	-3.05207	-21.3822	-5.82536	-32.248	-8.74722	4.66304	9.69529	9.2551	0.723938	-1.84987	-2.7905	0.739595	0.893003	0.110288	1
327751	21.8714	28.2519	11.8179	18.3201	30.1214	17.34	11.2156	17.9208	7.03817	24.395	-14.0896	4.57647	22.966	34.8758	30.6685	10.693	15.0876	22.3898	0.868103	0.962726	0.186592	1
328251	47.5856	55.0997	36.8577	50.9862	48.2068	44.661	56.5864	54.4787	56.7388	38.3487	23.7796	30.5083	39.9008	46.7956	54.3225	27.7905	40.5703	64.5143	0.179086	0.512525	0.525941	1
328751	34.9286	39.0893	46.7442	39.3294	28.6275	16.175	26.9625	23.873	46.9429	22.0308	15.2315	30.3076	33.7681	31.956	42.7581	24.6469	35.9123	54.3986	0.842025	0.955994	0.573315	1
329251	-31.1422	-11.7259	-16.6041	-10.232	-21.3448	-25.309	-22.9551	-14.4749	1.70407	-16.0291	-16.9626	10.2969	-0.357765	-13.5395	23.1845	-4.45125	0.303865	-14.976	0.030366	0.240566	1	1
329751	54.2576	58.9196	42.3843	23.2267	38.2506	50.9022	42.3343	30.038	28.5807	41.3575	20.3981	25.3973	38.9085	16.5954	22.8838	14.5041	24.2913	22.1139	0.0606688	0.334404	0.509044	1
330251	70.1549	60.4411	45.6908	39.5835	50.4174	38.5644	41.8401	56.606	41.7216	31.9255	23.1906	25.1135	41.2472	26.2488	39.5535	13.7545	34.914	46.9635	0.0297145	0.240566	0.779087	1
330751	0.494601	17.142	11.043	0.413547	7.47165	-2.00809	6.02928	9.88628	1.45357	-1.87055	-16.1804	-9.1397	7.22493	8.78933	0.319882	-15.756	9.82318	2.84019	0.197065	0.536287	0.506203	1
331251	24.7532	26.3148	21.2352	17.3851	30.0089	28.5917	19.7107	31.5798	20.6811	17.252	-5.09248	-0.36947	25.9107	28.9558	9.17605	6.35396	14.6526	25.1825	0.100426	0.413243	0.54117	1
331751	15.8696	22.4917	20.4287	10.1212	21.8528	30.217	12.6534	40.3487	4.49484	16.3517	17.4836	12.8293	30.3738	20.3166	12.1005	7.0515	23.0513	21.9963	0.666585	0.862568	1	1
332251	24.9624	40.6139	34.5292	26.5121	28.8081	31.8818	18.5227	30.6894	25.6621	25.935	2.48974	22.0797	36.3896	30.3332	21.8493	8.76734	42.4785	40.6514	0.53064	0.810163	0.985097	1
332751	-69.2881	-57.4688	-67.6886	-60.152	-55.1765	-83.6994	-74.2283	-60.4013	-52.7774	-55.5825	-77.1441	-51.4665	-40.5725	-48.5762	-56.6216	-37.3992	-44.5904	-48.1802	0.0701748	0.35022	0.825764	1
333251	-13.2378	-1.06324	-18.9504	-2.33784	-12.0494	-23.3249	-13.666	-20.6448	4.48154	8.94242	-23.162	-16.4891	-7.57758	-1.9055	-13.4558	-4.95311	-6.16415	-21.2744	0.729092	0.891669	1	1
333751	2.4554	13.8728	2.40335	14.1061	-10.2179	-11.2825	12.8678	3.08519	20.8076	39.0724	1.01181	11.2228	10.2887	-0.860443	30.2156	22.5339	29.3558	9.77799	0.0680649	0.35022	1	1
334251	33.5589	56.8363	29.83	14.5959	21.3187	7.20316	17.4314	30.4013	28.9682	38.505	17.0615	1.99914	18.0958	19.294	33.6522	15.3109	28.6924	35.1036	0.665312	0.862487	0.391167	1
334751	41.8513	64.145	41.132	35.208	13.1966	41.88	20.2642	39.6653	34.7253	48.0012	22.3732	17.9955	35.2656	44.4679	45.504	28.9397	26.3302	33.9176	0.679488	0.867931	0.457152	1
335251	39.48	68.3263	63.074	48.8859	16.133	40.0823	21.4044	30.587	32.0442	38.5671	22.0337	47.0824	40.0587	43.8024	34.1025	31.8023	25.0493	34.0886	0.62416	0.851252	0.157865	1
335751	21.7711	40.3001	28.2553	30.703	37.5194	28.2377	29.854	31.3109	44.5684	12.7643	25.2233	38.9337	22.6169	31.48	44.4171	19.6544	36.6579	15.892	0.267023	0.62218	1	1
336251	16.1168	23.8155	21.7496	25.3368	26.0823	6.34474	18.0018	16.6875	47.6689	19.0738	21.7069	22.4518	20.2906	26.7694	35.2106	28.4937	6.36577	8.75325	0.773801	0.91043	1	1
336751	32.0369	38.1851	39.9338	48.4105	38.1564	19.7164	51.2791	38.489	39.6726	35.3295	32.0616	16.5195	38.3972	41.8968	46.4325	30.5465	32.084	33.1755	0.41977	0.734841	0.542131	1
337251	30.0444	40.6675	31.4024	27.9833	24.723	25.8261	39.3537	30.8151	21.0352	27.7571	35.3872	27.6838	41.5462	37.4002	40.8942	40.9114	51.1696	13.3781	0.261545	0.613426	1	1
337751	40.354	49.436	14.9787	16.3346	36.4541	19.5334	22.0115	26.7374	53.2184	45.7413	32.6327	60.1894	38.8776	44.4236	41.117	35.1237	54.6484	25.2357	0.085528	0.376429	1	1
338251	32.4774	39.9323	33.6382	29.0379	20.2137	4.8843	27.1213	22.5817	39.1946	27.8775	22.2274	49.8591	36.1487	43.486	47.6325	32.546	43.1362	42.045	0.137374	0.468509	0.491615	1
338751	-18.7607	-13.1963	-6.79694	4.39018	-22.4534	-12.0673	2.7951	-2.81777	4.41494	15.3188	9.17566	15.0075	20.9441	13.1166	19.1585	12.9162	8.34997	9.71174	0.0129413	0.167471	0.250228	1
339251	0.604492	-1.40809	26.5838	20.0066	10.8996	13.1644	16.6578	9.0896	15.6157	45.9776	19.5956	26.0631	45.411	30.6041	43.3105	39.6637	28.4927	33.0734	8.92328e-05	0.011301	1	1
339751	-12.7232	-14.8286	-5.53447	-12.8207	-10.3908	-9.10003	-2.2519	-12.6304	7.1425	10.8774	15.6959	9.01322	6.21864	4.23929	29.8514	17.21	12.043	0.152833	6.60663e-05	0.011301	1	1
340251	29.2987	44.8435	41.4816	31.2923	35.9985	24.251	32.5027	27.4812	24.4967	43.8265	42.9388	38.3613	32.1382	41.6374	26.415	32.5498	50.8727	25.0156	0.305115	0.647209	0.837406	1
340751	31.9531	61.8898	43.8596	45.4166	38.2468	42.2514	38.2008	46.6819	34.8403	50.9712	50.2399	54.0543	47.634	45.9965	57.0245	38.78	36.5817	33.997	0.530378	0.810163	0.295578	1
341251	-54.4029	-15.0442	-51.1429	-30.3829	-40.4474	-28.2344	-47.9652	-27.6709	-22.1909	-23.312	-17.6537	-6.58669	-33.3673	-24.2996	-13.4572	-19.3124	-22.5333	-35.5625	0.0259258	0.22346	1	1
341751	-37.2528	-11.6284	-9.88551	-22.6068	-7.00294	-10.797	-10.0266	-7.43302	-3.7856	-14.4028	5.8009	-4.73739	-10.5191	-20.43	-25.3346	-17.7352	-7.02466	-18.0751	0.881299	0.96626	0.530085	1
342251	-4.00859	3.38515	-14.8873	-21.7825	-0.827057	-4.97363	9.21475	-11.4772	10.1863	-11.0578	15.1987	4.60779	6.80584	-19.3117	-20.465	-15.1515	5.12168	-6.69915	0.91013	0.971441	1	1
342751	36.3304	24.9132	3.48021	14.3424	8.48421	18.6049	7.58552	11.7374	31.8889	2.84377	25.4443	4.93543	19.0291	-6.66241	-2.92909	-6.60447	19.3284	-2.1033	0.0545535	0.315091	1	1
343251	17.8714	9.25443	8.84586	21.2213	21.8938	8.29551	-4.01507	10.4225	12.0826	-12.5075	1.8017	-12.2489	4.88697	0.0149821	-10.2717	-22.3407	2.76583	1.9663	0.000847829	0.0431787	1	1
343751	-23.1791	-17.5997	-16.644	-12.6731	-8.59328	-16.8728	-19.7216	-0.745666	-0.599796	-19.461	6.73845	-21.6049	-3.16323	-8.30897	-21.7828	-9.91612	-13.6946	-20.9684	0.908237	0.971441	1	1
344251	-11.9064	-20.7791	-1.00654	-6.42741	-3.72462	-6.26966	-13.0435	13.7907	7.412	-6.72514	-3.43499	1.96666	-10.2313	-5.20693	-18.885	-27.189	-9.97058	-24.8597	0.349823	0.687381	0.214265	1
345751	-19.0331	-32.4809	-10.6957	-32.304	-4.93983	-36.2714	-30.895	-29.6348	-20.3105	-16.4697	-9.83696	-14.6326	-24.0871	-26.6054	-23.2552	-19.1809	-19.582	-27.3639	0.351475	0.687381	1	1
346251	-3.13288	-10.9094	0.597395	-0.838228	13.705	-13.8598	16.6196	9.58514	-0.860032	-2.92218	8.23592	7.19899	-15.5291	-5.32614	3.71227	-5.9079	-3.0564	3.61754	0.652302	0.857957	0.708432	1
346751	-0.970743	9.09491	-7.03629	-5.44392	-12.4209	-2.83177	6.03651	-4.11363	8.55468	-6.5224	8.83407	2.39617	-10.727	-4.67198	-25.0571	-9.19998	-9.89864	-1.68866	0.37941	0.709188	0.264046	1
347251	-39.1756	-39.0108	-50.6048	-32.5206	-34.7448	-41.4621	-38.2465	-26.6256	-44.4401	-34.8652	-13.8767	-14.5586	-33.8589	-25.3644	-29.8581	-19.4655	-39.9596	-25.3693	0.00573739	0.116879	1	1
347751	-0.491633	-14.2346	-7.70814	-3.72968	-1.12224	-1.90149	-1.81807	4.4805	-17.5164	-21.3415	5.6467	3.25513	-7.79903	-17.735	-11.7557	-8.88466	-11.4602	-11.8777	0.277864	0.634991	1	1
348251	15.6698	16.2728	33.7084	17.0356	14.2723	17.1654	26.5928	21.0058	-5.69919	15.8867	12.2334	23.2948	6.15702	-4.46267	11.7437	5.70862	1.76067	9.54954	0.152791	0.486338	0.876012	1
348751	-2.42251	-10.7485	-0.14413	5.3133	-12.399	-10.1924	6.73786	-1.14985	-18.5854	5.03653	2.12092	17.0193	3.21492	3.43837	-0.372485	0.874722	0.121709	-4.74976	0.0395231	0.270962	1	1
349251	-48.8408	-63.512	-59.8288	-31.3389	-63.4279	-64.8143	-55.9566	-46.2637	-50.2217	-33.1138	-27.9196	-29.3934	-45.8937	-29.0111	-28.9334	-31.6603	-53.9828	-44.7628	0.00207539	0.0643371	1	1
349751	-24.5255	-39.6466	-27.6727	-25.2637	-32.0583	-28.5619	-26.1329	-17.9904	-23.356	-17.0491	-4.44362	-27.1823	-37.4224	-23.1269	-5.81636	-25.9263	-27.446	-26.4756	0.192687	0.526383	1	1
350251	-5.58374	10.6949	-9.36029	13.8761	-0.589876	-6.50277	16.5455	10.8984	4.72268	8.1366	19.6351	-5.89683	1.16995	10.159	-6.61908	-9.38398	-1.03764	-3.84166	0.645165	0.856789	0.725867	1
350751	-15.7068	-22.9382	-20.5504	-21.5118	-20.6684	-25.7959	-9.08905	-14.5978	-6.98746	-11.5686	-3.70902	2.14989	-6.74058	-13.8105	-13.7708	-16.7161	-13.6272	-16.1794	0.226183	0.56869	0.0120886	1
351251	-8.61823	-10.2933	-20.5352	-16.1903	-19.5119	-25.5051	6.23603	-21.0688	4.98424	-1.75287	6.88482	13.6892	-9.23724	-7.38793	-6.72714	-10.1734	8.70091	-34.0863	0.350045	0.687381	0.453266	1
351751	-11.1882	-23.6873	-18.9497	-18.7213	-34.9912	-18.9987	-18.5917	-11.3444	-4.22133	-4.85146	6.65828	13.5795	-19.1185	-17.0932	-30.872	-7.95251	-10.0498	-22.7002	0.442592	0.753146	0.0207973	1
352251	12.3746	13.3215	17.3775	15.8698	2.40347	25.6012	17.518	25.5803	13.1032	15.4301	35.5278	32.9667	24.2742	12.9793	-9.55022	25.6491	6.88693	7.91317	0.873521	0.962726	0.743116	1
352751	0.956705	-11.6951	-5.81952	-4.12843	-19.0334	-13.2115	-4.23557	13.9563	-1.62503	3.14888	22.1912	0.91288	21.6516	-4.59954	-0.23176	11.3024	-8.3777	-4.89271	0.13456	0.465735	0.90525	1
353251	1.03745	-18.5607	-20.3732	1.54338	-10.7945	-20.2375	0.969301	0.0209593	-10.6255	11.1984	-9.10817	-4.81893	0.72738	-6.08215	-11.4822	7.2326	-3.8658	-3.22046	0.133533	0.464436	1	1
353751	6.77477	-1.89127	16.0608	16.9277	11.7301	17.4129	15.335	12.1822	8.20124	6.14613	7.09882	17.5472	2.83176	-1.58793	-5.17614	9.70455	4.86191	4.56369	0.205957	0.54916	0.174588	1
354251	-22.2896	-7.87649	6.52241	-3.88172	13.364	-1.60193	16.8247	19.8681	4.60721	-5.3059	3.12325	20.5878	-3.88176	-11.2558	-9.73984	-3.5016	8.65058	-1.63086	0.696469	0.875482	0.212544	1
354751	-32.8149	-24.8429	-27.9977	-42.347	-14.6736	-23.0543	-22.188	-15.6101	-20.4276	-21.1787	-21.6737	-0.167347	-16.0281	-28.508	-18.8369	-4.81455	-23.8611	-14.798	0.066373	0.34797	1	1
355251	-23.8642	-19.9483	-34.2417	-11.8823	-26.6502	-22.4527	-28.2987	-21.8444	-38.5743	-22.6115	-18.2817	-10.8905	-11.6375	-28.2792	-24.031	-17.1365	-20.8388	-14.7762	0.0606529	0.334404	1	1
355751	-32.3838	-16.6424	-29.7245	-2.08176	-17.1789	-16.208	-24.0516	-22.946	-28.9526	-14.7828	-5.8811	-12.6464	-19.4511	-4.90202	-23.4366	-7.40123	-1.90866	-8.38505	0.13799	0.468509	0.163279	1
356251	3.43128	-3.54044	6.62495	3.76926	8.21704	8.98553	-4.63145	15.908	13.8228	4.46867	-8.49443	-2.11481	-0.00344183	4.84511	-20.5202	-14.2619	5.31446	-3.70595	0.0217976	0.199253	1	1
356751	26.01	-6.35542	12.9218	-5.36172	6.93199	2.0699	25.8447	13.7842	24.5421	6.97097	9.49526	14.1938	-6.41378	8.29461	5.51074	-9.15689	5.56375	-0.581974	0.335296	0.675328	0.214377	1
357251	-30.0816	-17.2346	-17.7211	-10.1707	-30.6622	-19.4505	-6.57807	-14.8505	-5.89936	-11.2595	-13.2613	-0.802873	-21.263	-26.627	-34.5487	-31.4137	-12.3622	-18.6367	0.789872	0.924319	0.101827	1
357751	-11.3905	-0.436055	7.63692	10.4281	2.3236	0.535142	3.96353	-1.46356	-3.67486	8.55903	4.94657	12.3827	-0.512055	-5.67579	-0.734287	2.84537	4.65544	8.51678	0.462581	0.763474	0.294407	1
358251	-62.2348	-51.6446	-43.6052	-48.0537	-32.9945	-45.7346	-59.485	-49.5742	-42.4123	-28.2585	-20.5315	-23.6871	-45.789	-48.5334	-28.7089	-39.369	-39.3281	-30.0556	0.0688983	0.35022	0.243447	1
358751	-32.9661	-28.4318	-42.8166	-21.067	-17.6365	-34.8384	-26.9033	-36.0253	-31.5824	-26.1385	-40.2711	-40.8505	-25.0565	-47.1672	-67.4936	-31.8052	-48.3554	-39.4132	0.0544907	0.315091	1	1
359251	19.2482	29.0853	32.5725	18.6489	32.0572	30.8619	14.1705	9.6507	13.6705	18.6175	-8.97144	-11.6769	27.2323	6.95793	-25.022	-17.793	-12.6057	10.6406	0.00268606	0.070932	1	1
359751	-1.76441	3.70455	-8.27501	4.4553	7.52869	-0.220976	-7.78899	6.91408	-5.87963	2.95328	-3.44067	-14.2873	-6.99348	-4.83156	-6.38552	-19.9895	-15.122	17.0726	0.207607	0.54916	1	1
360251	-29.5133	-26.9117	-37.4898	-38.3406	-34.2763	-45.1998	-41.8286	-32.3533	-35.6092	-42.0272	-38.1983	-36.5341	-29.601	-40.9096	-48.6366	-30.1627	-34.7638	-40.7144	0.435252	0.749601	1	1
360751	-81.377	-62.6312	-82.7894	-52.1223	-44.4634	-77.1128	-53.6431	-58.6638	-55.3767	-53.6149	-60.7183	-51.7519	-50.4199	-62.6329	-66.3237	-38.9434	-53.1171	-54.836	0.295446	0.644072	0.296404	1
361251	24.3704	22.9707	20.2616	16.2172	34.867	31.0315	28.2365	4.27557	23.8671	15.846	12.4435	5.73017	17.3394	7.19144	-37.3714	8.7589	22.1045	25.9423	0.121871	0.457337	0.844801	1
361751	-14.2417	-20.5804	-12.504	-18.4167	-14.168	-0.492475	3.74255	-11.002	-15.8902	-25.3533	-14.2794	-13.9578	-23.9554	-16.9809	-48.5272	-20.1049	-32.1175	-20.043	0.0141079	0.167471	1	1
362251	-8.69096	-12.6463	-8.87351	-12.3253	-3.3577	-5.89177	9.51927	-1.31232	-6.30487	-17.729	-10.4602	6.58506	-2.36252	-7.55301	-4.21922	-8.50316	-7.83576	-22.3017	0.534431	0.811386	0.70582	1
362751	-28.74	-44.483	-39.4233	-36.7984	-34.2989	-44.3366	-31.5115	-32.1786	-27.1896	-29.0787	-23.5083	-17.7006	-28.9014	-39.9304	-19.038	-29.2493	-21.2126	-32.3533	0.0146897	0.167471	1	1
363251	-49.1967	-59.7053	-57.0829	-51.2458	-61.1044	-51.9463	-53.0179	-52.2728	-44.3851	-41.0462	-26.0313	-36.5345	-49.2219	-46.3724	-37.6145	-31.7658	-37.296	-50.3533	0.0145454	0.167471	0.897579	1
363751	-64.7521	-45.9477	-62.2855	-40.7401	-44.862	-52.5073	-51.4768	-38.9891	-31.4452	-33.5934	-30.622	-38.1052	-38.625	-38.5137	-14.0659	-28.2001	-43.7919	-43.1825	0.0668743	0.348039	0.582822	1
364251	-23.9141	-22.1267	-27.168	-13.2821	-21.1533	-39.5918	-13.3026	-20.0287	-19.3248	-14.578	-18.5605	-16.4889	-31.9542	-18.14	-31.1598	-6.44412	-31.4216	-2.31735	0.537115	0.811386	0.833952	1
364751	-16.3407	-25.2955	-25.5376	-22.4087	-8.04423	-31.222	-9.12723	-38.8556	-11.0198	-15.3899	-20.104	-7.54445	-22.1657	-31.9271	-30.3091	-0.661975	-30.5073	-11.1358	0.698633	0.875482	1	1
365251	-19.1329	-8.19812	-32.3143	-10.0939	-6.91013	-23.6659	5.07457	-13.4573	3.84671	-13.2844	-13.0401	5.45995	-17.048	-29.5134	-11.1803	1.66464	-11.6755	7.5054	0.747233	0.895575	0.233675	1
365751	-59.8943	-28.6127	-68.174	-35.2546	-39.851	-62.0236	-28.0057	-23.518	-35.2001	-30.5852	-25.1817	-4.72842	-23.7216	-39.026	-21.0794	-14.3121	-43.7207	-18.958	0.0730112	0.358069	0.820099	1
366251	-24.7471	-25.8577	-42.6155	-27.0281	-18.424	-36.8303	-21.5138	-17.1591	-29.7342	-23.7474	-18.837	-28.2082	-15.366	-20.9347	-22.4999	-11.9641	-23.6469	-16.8535	0.0495583	0.299196	1	1
366751	32.6524	43.5466	34.1666	36.8818	32.8235	40.1861	35.8037	25.3752	23.4814	25.8303	8.79642	15.4875	21.3409	29.347	-0.339934	9.96445	21.1107	26.374	0.000709672	0.0389228	1	1
367251	20.0002	6.94413	9.415	15.9215	2.70688	2.59729	13.9591	29.418	4.33206	12.3609	-8.70089	-6.45402	4.52319	1.91795	-18.9607	-4.42819	-4.15591	2.60293	0.00440798	0.0954668	1
