# Supplementary material
Source: publisher figshare collection journal article supplement (https://gsajournals.figshare.com/articles/dataset/_/11469987)
Supplement: Supplementary file 1 [file 1]

**Table S1.** Primers used for ddPCR confirmation of mitogenome copy number variation

|                          | <b>Primer Name</b> | <b>Primer Sequence</b> |
|--------------------------|--------------------|------------------------|
| <b>High-Copy Markers</b> | At_H8_F_64789      | AACTTGTTCCCATCTCACCA   |
|                          | At_H8_F_64986      | ACCACCAAGTGCAGCTAAAG   |
|                          | At-H1-F-38153      | CCTTCTGTGCTATCCCCTAT   |
|                          | At-H1-R-38302      | CTGCGTAGATGGAAGATCAG   |
|                          | At_H10_F_126786    | CTTACTTCGTCCCACACCAC   |
|                          | At_H10_R_126961    | GTCTGCGCTTGAGTTTGATT   |
|                          | At_H3_F_137058     | TGAGACCAAGTCAAGCTTCC   |
|                          | At_H3_R_137254     | TCCAGCTATTTTCAAGCTCTGG |
|                          | At-H2-F-167665     | CTACCTTTCCAGGAGCAACT   |
|                          | At-H2-R-167821     | ACTGAAAGGAGAGGTCCAAG   |
|                          | At_H4_F_170332     | GGTGACCTGTTTCGATTACCA  |
|                          | At_H4_R_170492     | AGCTGTAGGCTCAAACCAAA   |
| <b>Low-Copy Markers</b>  | At_L3_F_19055      | CTCACTGACCTGAGCGATTT   |
|                          | At_L3_R_19241      | GGGCCCTTTTACCAAGTCTA   |
|                          | At_L9_F_22073      | GTCTTCATTCAAGCGACGAT   |
|                          | At_L9_R_22243      | TTATCGAGGGTAATCGGTCA   |
|                          | At_L6_F_79273      | GGAAGTTGACCACTTGTTGG   |
|                          | At_L6_R_79467      | GCCAACTCCCCAGTTTCTAT   |
|                          | At_L7_F_223658     | TATTTGCCTCTCTCGATTGC   |
|                          | At_L7_R_223855     | TAGCAAACCTCGTTCGATTCC  |
|                          | At_L11_F_241202    | CTTCTCTACGCCCAATGAGA   |
|                          | At_L11_R_241361    | CATCACGATGTCGAATGAAA   |
|                          | At_L10_F_332152    | AGCTTTCAACCGGTCTTTTT   |
|                          | At_L10_R_332309    | AGAGGCATTTCACTGTGCTC   |
